# Supplementary material for: Anaerobiosis influences virulence properties of Pseudomonas aeruginosa cystic fibrosis isolates and the interaction with Staphylococcus aureus
Source: PubMed Central journal article supplement (PMC6494883; doi:10.1038/s41598-019-42952-x), 2019-05-01
Supplement: 41598_2019_42952_MOESM1_ESM.pdf [file 41598_2019_42952_MOESM1_ESM.pdf]

**Anaerobiosis influences virulence properties of  
*Pseudomonas aeruginosa* cystic fibrosis isolates and the  
interaction with *Staphylococcus aureus***

Ross Pallett<sup>1</sup>, Laura J. Leslie<sup>2</sup>, Peter. A. Lambert<sup>1</sup>, Ivana Milic<sup>1</sup>, Andrew Devitt<sup>1</sup> and Lindsay J. Marshall<sup>1</sup>

<sup>1</sup>School of Life and Health Sciences, Aston University, Birmingham, UK

<sup>2</sup>Aston Institute of Materials Research, School of Engineering and Applied Science, Aston University, Birmingham, UK

## Supplementary information

### **Inhibition of *S. aureus* growth by *P. aeruginosa* CF clinical isolates**

Reference strain PAO1 and the eight CF clinical isolates of *P. aeruginosa* were tested for growth inhibition of *S. aureus* under normoxia, on an agar plate based cross-streak assay. After standardising the bacterial densities of overnight cultures, *P. aeruginosa* isolates were streaked horizontally across the surface of the agar plate and allowed to dry, prior to cross-streaking *S. aureus* vertically. Plates were then incubated at 37 °C and 5% CO<sub>2</sub> for 24 h, prior to the intersection of the cross-streak being visually inspected.

As shown in **Supplementary Fig. S1** following 24 h incubation, PAO1 and CF isolates 1, 2, 4, 5 and 7 all inhibited *S. aureus* growth in co-culture (dashed white box). Conversely, CF isolates 3, 6 and 8 had no effect upon *S. aureus* growth.

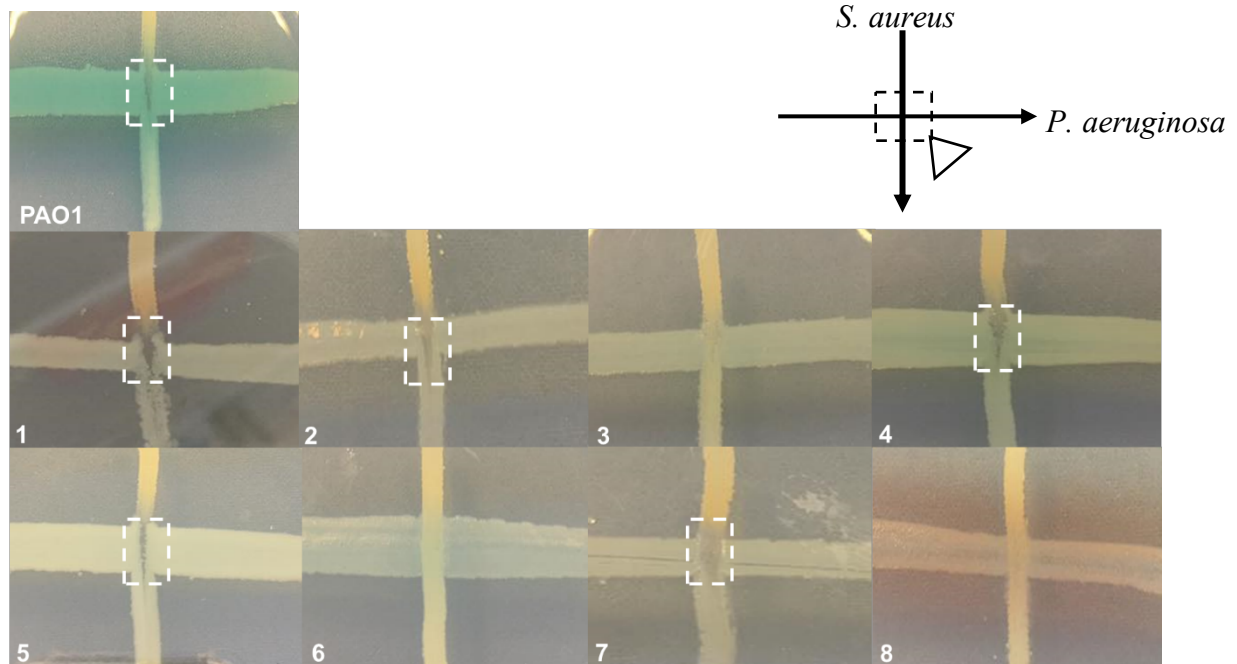

**Supplementary Figure S1. Cross-streak growth inhibition assay between CF clinical isolates of *P. aeruginosa* with *S. aureus* on solid LB agar plates.** Overnight bacterial cultures of *S. aureus* and *P. aeruginosa* were standardised to an OD<sub>470</sub> of 1.0. *P. aeruginosa* was inoculated horizontally across the centre of the agar plate and allowed to dry. *S. aureus* was subsequently streaked vertically. Plates were incubated overnight, prior to being read. Zones of growth inhibition are marked by white dashed boxes. Images are representative of three individual experiments ( $N=3$ ), each performed in duplicate.

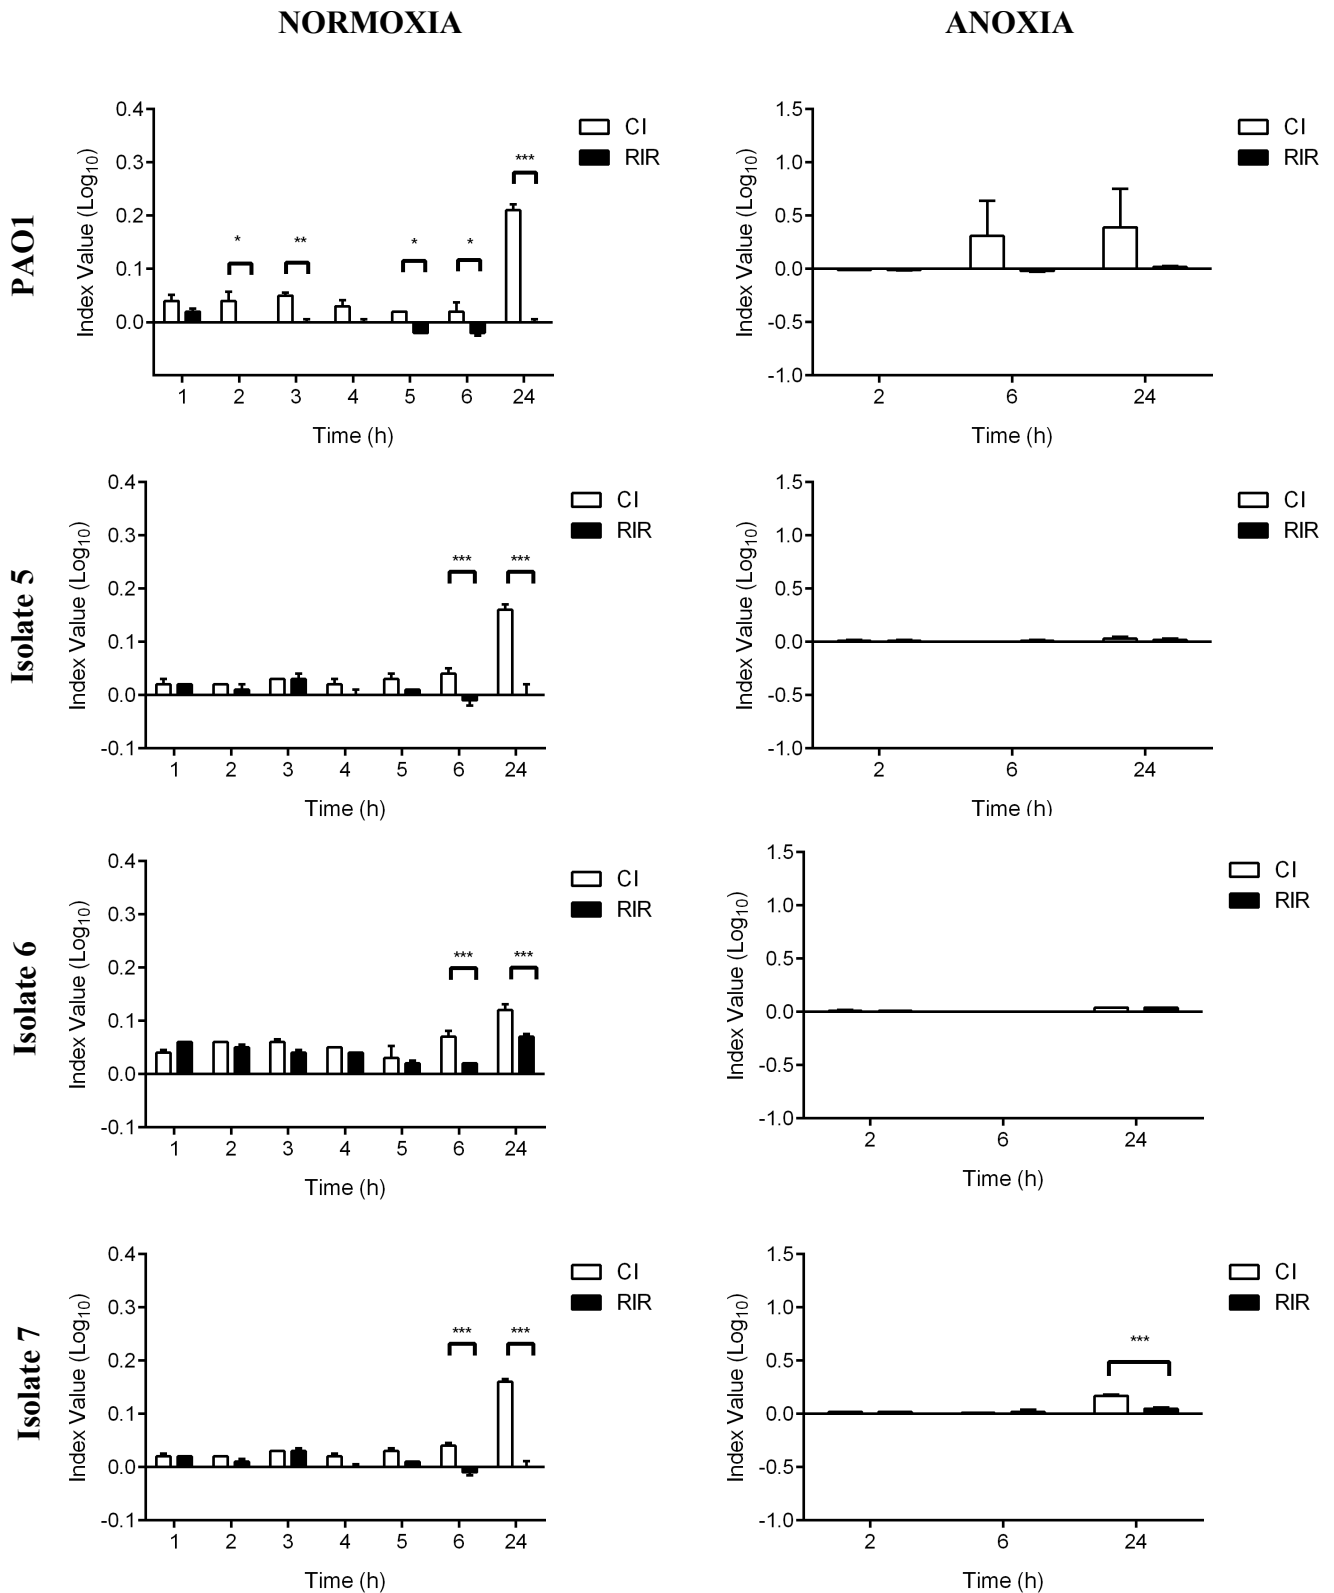

**Supplementary Figure S2. *S. aureus* and *P. aeruginosa* mono and co-culture growth curves under normoxia and anoxia.** Each value represents the mean of the CI and RIR  $\pm$  S.E.M calculated from single and dual cultures. Each value is the mean of three independent experiments ( $N=3$ ), each performed in triplicate. Statistical differences were determined using two-way ANOVA comparing the CI to the RIR, with Bonferroni's multiple comparisons *post-hoc* test. \* $P<0.05$ , \*\* $P<0.01$  and \*\*\* $P<0.001$ .

**Supplementary Table S1. Summary of planktonic co-culture and mixed species biofilm competition data for *P. aeruginosa* PAO1 and CF isolates 5, 6 and 7 following growth under normoxia and anoxia.** Data is obtained from Figure 1, Figure 2 and Supplementary Fig. S2.

| Isolate   | Outcompetes <i>S. aureus</i> in planktonic co-culture |        | Outcompetes <i>S. aureus</i> in mixed species biofilm |        |
|-----------|-------------------------------------------------------|--------|-------------------------------------------------------|--------|
|           | Normoxia                                              | Anoxia | Normoxia                                              | Anoxia |
| PAO1      | Yes                                                   | No     | Yes                                                   | No     |
| Isolate 5 | Yes                                                   | No     | Yes                                                   | No     |
| Isolate 6 | Yes                                                   | No     | No                                                    | No     |
| Isolate 7 | Yes                                                   | Yes    | Yes                                                   | Yes    |

**Supplementary Table S2. Cell-free secretome of *P. aeruginosa* PAO1 following growth under normoxia and anoxia.** Data represents the average normalised abundances and fold increase from  $N=1$ . A fold change of 1.0 is indicative of no change between normoxia and anoxia. O1A = *P. aeruginosa* PAO1 grown under anoxia. O1O = *P. aeruginosa* PAO1 grown under normoxia.

| Accession   | Peptides (unique) | Score   | Description                                 | Average Normalised Abundances |          | Fold increase |       |
|-------------|-------------------|---------|---------------------------------------------|-------------------------------|----------|---------------|-------|
|             |                   |         |                                             | O1A                           | O1O      | O1A           | O1O   |
| CH60_PSEA7  | 63 (6)            | 4162.84 | 60 kDa chaperonin                           | 3264.99                       | 2802.59  | 1.16          |       |
| NIRS_PSEAE  | 49 (43)           | 3286.73 | Nitrite reductase                           | 5.70E+04                      | 1.61E+05 |               | 2.82  |
| EFG1_PSEAE  | 57 (14)           | 3226.98 | Elongation factor G 1                       | 4.38E+04                      | 4.35E+04 | 1.01          |       |
| CATA_PSEAE  | 42 (24)           | 2795.92 | Catalase                                    | 1.05E+05                      | 2.78E+05 |               | 2.65  |
| DNAK_PSEAB  | 41 (17)           | 2657.45 | Chaperone protein DnaK                      | 5.39E+04                      | 1.30E+04 | 4.15          |       |
| AMPC_PSEAE  | 36 (31)           | 2369.11 | Beta-lactamase                              | 1.24E+05                      | 1.76E+05 |               | 1.42  |
| DLDH1_PSEAE | 35 (22)           | 2195.21 | Dihydropolyl dehydrogenase                  | 3351.71                       | 6.00E+04 |               | 17.90 |
| RPOB_PSEAB  | 46 (10)           | 2072.97 | DNA-directed RNA polymerase subunit beta    | 1.62E+04                      | 5416.61  | 2.99          |       |
| EFTU_PSEAB  | 28 (9)            | 1999.82 | Elongation factor Tu                        | 4.47E+04                      | 1914.24  | 23.35         |       |
| PNP_PSEAB   | 37 (12)           | 1995.68 | Polyribonucleotide nucleotidyltransferase   | 1.26E+04                      | 2.42E+04 |               | 1.92  |
| CLPB_PSEAE  | 38 (19)           | 1974.4  | Chaperone protein ClpB                      | 3654.37                       | 1.63E+04 |               | 4.46  |
| MASZ_PSEAB  | 34 (11)           | 1917.01 | Malate synthase G                           | 2.20E+04                      | 3.21E+04 |               | 1.46  |
| FLID2_PSEAE | 29 (24)           | 1882.05 | B-type flagellar hook-associated protein 2  | 6164.14                       | 3.39E+04 |               | 5.50  |
| RPOC_PSEA7  | 34 (6)            | 1843.37 | DNA-directed RNA polymerase subunit beta'   | 2.21E+04                      | 485.62   | 45.51         |       |
| NOSZ_PSEAE  | 35 (19)           | 1841.49 | Nitrous-oxide reductase                     | 4.78E+04                      | 4.24E+04 | 1.13          |       |
| ATPB_PSEAB  | 30 (6)            | 1817.99 | ATP synthase subunit beta                   | 2724.83                       | 1.03E+04 |               | 3.78  |
| ODP1_PSEAE  | 38 (32)           | 1800.49 | Pyruvate dehydrogenase E1 component         | 4.85E+04                      | 1610.8   | 30.11         |       |
| Y807_PSEAB  | 26 (19)           | 1772.35 | Putative prophage major tail sheath protein | 1.22E+05                      | 5.25E+04 | 2.32          |       |
| FLICB_PSEAE | 23 (15)           | 1715.76 | B-type flagellin                            | 7976.19                       | 6.00E+04 |               | 7.52  |
| DHE2_PSEAE  | 38 (29)           | 1674.5  | NAD-specific glutamate dehydrogenase        | 1.64E+04                      | 4843.73  | 3.39          |       |
| SAHH_PSEAB  | 32 (14)           | 1543.97 | Adenosylhomocysteinase                      | 1.30E+04                      | 4.08E+04 |               | 3.14  |
| TIG_PSEAB   | 26 (2)            | 1463.62 | Trigger factor                              | 6632.97                       | 304.39   | 21.79         |       |

|             |         |         |                                                                                           |          |          |       |       |
|-------------|---------|---------|-------------------------------------------------------------------------------------------|----------|----------|-------|-------|
| ACNB_PSEAE  | 27 (24) | 1463.21 | Aconitate hydratase B                                                                     | 3.22E+04 | 3138.99  | 10.26 |       |
| SYI_PSEAE   | 29 (5)  | 1455.14 | Isoleucine--tRNA ligase                                                                   | 2541.73  | 6700.29  |       | 2.64  |
| FABY_PSEAE  | 21 (18) | 1447.88 | Beta-ketoacyl-[acyl-carrier-protein] synthase FabY                                        | 2307.24  | 2.14E+04 |       | 9.28  |
| ODP2_PSEAE  | 23 (15) | 1444.42 | Dihydrolipoyllysine-residue acetyltransferase component of pyruvate dehydrogenase complex | 4.02E+04 | 1.10E+04 | 3.65  |       |
| BRAC_PSEAE  | 22 (15) | 1427.49 | Leucine-, isoleucine-, valine-, threonine-, and alanine-binding protein                   | 1.02E+04 | 8.87E+04 |       | 8.70  |
| DAVT_PSEAE  | 24 (14) | 1418.89 | 5-aminovalerate aminotransferase DavT                                                     | 4.70E+04 | 5.18E+04 |       | 1.10  |
| ATPA_PSEAB  | 24 (4)  | 1415.29 | ATP synthase subunit alpha                                                                | 5576.59  | 1.38E+04 |       | 2.47  |
| OTCC_PSEAE  | 24 (13) | 1399.22 | Ornithine carbamoyltransferase, catabolic                                                 | 5.79E+04 | 4.30E+04 | 1.35  |       |
| IDH_PSEAB   | 30 (22) | 1376.12 | Isocitrate dehydrogenase [NADP]                                                           | 3.28E+04 | 4364.97  | 7.51  |       |
| Y421_PSEA8  | 21 (18) | 1351.24 | UPF0312 protein PLES_04211+D263:D323                                                      | 2.03E+04 | 5.70E+04 |       | 2.81  |
| AMPA_PSEAE  | 18 (5)  | 1328.21 | Cytosol aminopeptidase                                                                    | 3646.13  | 1.86E+04 |       | 5.10  |
| DAVD_PSEAE  | 27 (17) | 1301.4  | Glutarate-semialdehyde dehydrogenase DavD                                                 | 3.93E+04 | 2.47E+04 | 1.59  |       |
| ATOB_PSEAE  | 25 (22) | 1297.87 | Acetyl-CoA acetyltransferase                                                              | 4060.25  | 5.38E+04 |       | 13.25 |
| HUTU_PSEAB  | 23 (9)  | 1293.98 | Urocanate hydratase                                                                       | 5284.34  | 4.26E+04 |       | 8.06  |
| HTPG_PSEAE  | 23 (2)  | 1290.88 | Chaperone protein HtpG                                                                    | 1.06E+04 | 9989.09  | 1.06  |       |
| ARUC_PSEAE  | 21 (18) | 1278.7  | Succinylornithine transaminase/acetylornithine aminotransferase                           | 6341.14  | 3.00E+04 |       | 4.73  |
| ARCA_PSEAE  | 21 (13) | 1239.64 | Arginine deiminase                                                                        | 3.89E+04 | 1573.49  | 24.72 |       |
| AMPA_PSEAB  | 16 (1)  | 1227.93 | Probable cytosol aminopeptidase                                                           | 642.25   | 2534.71  |       | 3.95  |
| ASPQ_PSEAE  | 22 (14) | 1203.8  | Glutaminase-asparaginase                                                                  | 1298.62  | 8.62E+04 |       | 66.38 |
| RECA_PSEAB  | 17 (3)  | 1198.9  | Protein RecA                                                                              | 7568.96  | 105.58   | 71.69 |       |
| SYL_PSEAB   | 22 (11) | 1192.86 | Leucine--tRNA ligase                                                                      | 2078.07  | 1.38E+04 |       | 6.64  |
| CISY_PSEAE  | 20 (14) | 1141.85 | Citrate synthase                                                                          | 5384.88  | 1.99E+04 |       | 3.70  |
| SYV_PSEAE   | 27 (12) | 1113.4  | Valine--tRNA ligase                                                                       | 1908.66  | 2.90E+04 |       | 15.19 |
| Y3922_PSEAE | 21 (17) | 1109.43 | Uncharacterized protein PA3922                                                            | 2393.8   | 3.89E+04 |       | 16.25 |
| EFG2_PSEAE  | 19 (3)  | 1102.25 | Elongation factor G 2                                                                     | 1179.76  | 1562.63  |       | 1.32  |
| SYI_PSEAB   | 25 (3)  | 1083.23 | Isoleucine--tRNA ligase                                                                   | 482.49   | 486.09   |       | 1.01  |
| GYRA_PSEAE  | 20 (12) | 1042.48 | DNA gyrase subunit A                                                                      | 6841     | 8170.72  |       | 1.19  |
| DSBA_PSEAB  | 16 (12) | 1003.81 | Thiol:disulfide interchange protein DsbA                                                  | 2.70E+04 | 5.85E+04 |       | 2.17  |
| PGK_PSEAB   | 19 (10) | 975.67  | Phosphoglycerate kinase                                                                   | 4638.13  | 1.76E+04 |       | 3.79  |
| ETFB_PSEAE  | 13 (12) | 963.33  | Electron transfer flavoprotein subunit beta                                               | 7.26E+04 | 2.15E+04 | 3.38  |       |

|             |         |        |                                                                                             |          |          |       |       |
|-------------|---------|--------|---------------------------------------------------------------------------------------------|----------|----------|-------|-------|
| AZUR_PSEAE  | 13 (13) | 943.35 | Azurin                                                                                      | 1.10E+05 | 4.98E+05 |       | 4.53  |
| PCKA_PSEAE  | 19 (6)  | 936.19 | Phosphoenolpyruvate carboxykinase (ATP)                                                     | 2.17E+04 | 1.24E+04 | 1.75  |       |
| RS1_PSEAE   | 20 (17) | 923.42 | 30S ribosomal protein S1                                                                    | 3.49E+04 | 3750.78  | 9.30  |       |
| ODB2_PSEAE  | 18 (13) | 917.1  | Lipoamide acyltransferase component of branched-chain alpha-keto acid dehydrogenase complex | 1686.32  | 3.11E+04 |       | 18.44 |
| EFTS_PSEAB  | 17 (5)  | 886.77 | Elongation factor Ts                                                                        | 3.65E+04 | 1.01E+04 | 3.61  |       |
| GCSP1_PSEAE | 19 (6)  | 868.57 | Glycine dehydrogenase (decarboxylating) 1                                                   | 6384.8   | 2218.39  | 2.88  |       |
| GATA_PSEAE  | 14 (3)  | 867.68 | Glutamyl-tRNA(Gln) amidotransferase subunit A                                               | 845.11   | 3118.8   |       | 3.69  |
| GPMI_PSEAE  | 15 (6)  | 852.95 | 2,3-bisphosphoglycerate-independent phosphoglycerate mutase                                 | 4117.86  | 8031.69  |       | 1.95  |
| P5217_PSEAE | 15 (9)  | 840.95 | Probable binding protein component of ABC iron transporter PA5217                           | 5646.18  | 4.77E+04 |       | 8.45  |
| METE_PSEAE  | 20 (10) | 835.19 | 5-methyltetrahydropteroyltriglutamate--homocysteine methyltransferase                       | 5653.51  | 1.30E+04 |       | 2.30  |
| PHHC_PSEAE  | 15 (12) | 832.54 | Aromatic-amino-acid aminotransferase                                                        | 3985.79  | 1.60E+04 |       | 4.01  |
| DPO3B_PSEAE | 12 (7)  | 816.52 | Beta sliding clamp                                                                          | 8036.12  | 1.20E+04 |       | 1.49  |
| ELAS_PSEAE  | 17 (10) | 793.21 | Elastase                                                                                    | 6184.42  | 1.25E+05 |       | 20.21 |
| SUCC_PSEAE  | 17 (4)  | 770.47 | Succinate--CoA ligase [ADP-forming] subunit beta                                            | 2.36E+04 | 8540.9   | 2.76  |       |
| FUMC2_PSEAE | 14 (12) | 770.14 | Fumarate hydratase class II 2                                                               | 1581.58  | 1.45E+04 |       | 9.17  |
| DPO1_PSEAE  | 16 (15) | 769.54 | DNA polymerase I                                                                            | 5727.45  | 2258.88  | 2.54  |       |
| FUMC1_PSEAE | 10 (8)  | 757.77 | Fumarate hydratase class II 1                                                               | 1306.67  | 9571.43  |       | 7.33  |
| RPOA_PSEAB  | 17 (3)  | 755.89 | DNA-directed RNA polymerase subunit alpha                                                   | 5807.02  | 3456.45  | 1.68  |       |
| AMPA_PSEA7  | 14 (1)  | 740.85 | Probable cytosol aminopeptidase                                                             | 362.07   | 2347.13  |       | 6.48  |
| IF2_PSEA7   | 20 (4)  | 714.05 | Translation initiation factor IF-2                                                          | 1891.11  | 716.75   | 2.64  |       |
| SYR_PSEA7   | 14 (5)  | 706.2  | Arginine--tRNA ligase                                                                       | 3650.91  | 323.37   | 11.29 |       |
| DCTP_PSEAE  | 17 (11) | 700.98 | C4-dicarboxylate-binding periplasmic protein DctP                                           | 2.32E+04 | 2.90E+04 |       | 1.25  |
| ARCC_PSEAE  | 14 (12) | 678.24 | Carbamate kinase                                                                            | 8.91E+04 | 5654.23  | 15.76 |       |
| RL1_PSEA7   | 11 (5)  | 675.4  | 50S ribosomal protein L1                                                                    | 2.48E+04 | 256.9    | 96.54 |       |
| SUCD_PSEAE  | 13 (10) | 675.23 | Succinate--CoA ligase [ADP-forming] subunit alpha                                           | 9.12E+04 | 3.58E+04 | 2.55  |       |
| NADE_PSEAB  | 13 (2)  | 669.36 | NH(3)-dependent NAD(+) synthetase                                                           | 1.40E+04 | 1.21E+04 | 1.16  |       |
| PORF_PSEAE  | 12 (10) | 668.37 | Outer membrane porin F                                                                      | 2.28E+04 | 2.32E+04 |       | 1.02  |
| SURA_PSEAE  | 11 (10) | 664.87 | Chaperone SurA                                                                              | 4289.48  | 6630.36  |       | 1.55  |
| STHA_PSEAB  | 13 (9)  | 657.46 | Soluble pyridine nucleotide transhydrogenase                                                | 5524.25  | 6580.99  |       | 1.19  |

|             |         |        |                                                                                                    |          |          |       |       |
|-------------|---------|--------|----------------------------------------------------------------------------------------------------|----------|----------|-------|-------|
| RL5_PSEA8   | 11 (3)  | 655.31 | 50S ribosomal protein L5                                                                           | 6.44E+04 | 1.79E+04 | 3.60  |       |
| ACNA_PSEAE  | 12 (6)  | 654.55 | Aconitate hydratase A                                                                              | 7970.97  | 1464.29  | 5.44  |       |
| RL6_PSEA7   | 12 (4)  | 640.47 | 50S ribosomal protein L6                                                                           | 4.33E+04 | 684.66   | 63.24 |       |
| BFR_PSEAE   | 14 (10) | 634.92 | Bacterioferritin                                                                                   | 1.57E+04 | 1.88E+04 |       | 1.20  |
| ILVC_PSEAB  | 16 (8)  | 630.16 | Ketol-acid reductoisomerase (NADP(+))                                                              | 2977.29  | 2952.71  | 1.01  |       |
| ODO2_PSEAE  | 11 (7)  | 630.11 | Dihydropolypyllysine-residue succinyltransferase component of 2-oxoglutarate dehydrogenase complex | 1.43E+04 | 6441.83  | 2.22  |       |
| ARGC_PSEAE  | 13 (4)  | 627.95 | N-acetyl-gamma-glutamyl-phosphate reductase                                                        | 1987.28  | 5454.47  |       | 2.74  |
| TAL_PSEAB   | 12 (10) | 617.93 | Transaldolase                                                                                      | 8172.41  | 1.77E+04 |       | 2.17  |
| RRF_PSEAB   | 12 (11) | 616.96 | Ribosome-recycling factor                                                                          | 1.53E+04 | 3244.5   | 4.72  |       |
| SYP_PSEAE   | 11 (4)  | 615.53 | Proline--tRNA ligase                                                                               | 5671.83  | 959.23   | 5.91  |       |
| AHPC_PSEAB  | 13 (12) | 611.95 | Alkyl hydroperoxide reductase C                                                                    | 8.73E+04 | 2.40E+05 |       | 2.75  |
| GLN1B_PSEAE | 10 (9)  | 611.68 | Glutamine synthetase                                                                               | 1.97E+04 | 2948.92  | 6.68  |       |
| METK_PSEAB  | 15 (4)  | 607.62 | S-adenosylmethionine synthase                                                                      | 7311.51  | 2.05E+04 |       | 2.80  |
| MMSA_PSEAE  | 11 (10) | 604.8  | Methylmalonate-semialdehyde dehydrogenase [acylating]                                              | 8494.93  | 1.85E+04 |       | 2.18  |
| TPX_PSEAE   | 8 (6)   | 603.69 | Thiol peroxidase                                                                                   | 1.36E+04 | 4429.23  | 3.07  |       |
| RECA_PSEST  | 10 (1)  | 597.49 | Protein RecA                                                                                       | 3700.22  | 108.16   | 34.21 |       |
| GGT_PSEAE   | 12 (7)  | 584.06 | Gamma-glutamyltranspeptidase                                                                       | 1205.15  | 1.31E+04 |       | 10.87 |
| THIO_PSEAE  | 11 (9)  | 580.98 | Thioredoxin                                                                                        | 3.26E+04 | 9.35E+04 |       | 2.87  |
| GSHR_PSEAE  | 13 (10) | 569.23 | Glutathione reductase                                                                              | 1704.51  | 9414.46  |       | 5.52  |
| DAPA_PSEAE  | 10 (6)  | 568.87 | 4-hydroxy-tetrahydrodipicolinate synthase                                                          | 1.51E+04 | 3.11E+04 |       | 2.06  |
| ACSA1_PSEAE | 15 (11) | 568.43 | Acetyl-coenzyme A synthetase 1                                                                     | 4129.3   | 2046.61  | 2.02  |       |
| DHAS_PSEAE  | 11 (6)  | 565.84 | Aspartate-semialdehyde dehydrogenase                                                               | 2629.25  | 9556.47  |       | 3.63  |
| SPUD_PSEAB  | 14 (13) | 555.06 | Putrescine-binding periplasmic protein SpuD                                                        | 1.22E+04 | 5.13E+04 |       | 4.20  |
| ETFA_PSEAE  | 9 (9)   | 554.49 | Electron transfer flavoprotein subunit alpha                                                       | 5.30E+04 | 2.45E+04 | 2.16  |       |
| DAPB_PSEAB  | 10 (4)  | 552.17 | 4-hydroxy-tetrahydrodipicolinate reductase                                                         | 1.09E+04 | 9560.14  | 1.14  |       |
| NADE_PSEA7  | 11 (1)  | 549.57 | NH(3)-dependent NAD(+) synthetase                                                                  | 1.22E+04 | 1.39E+04 |       | 1.14  |
| ENO_PSEAB   | 12 (8)  | 549.46 | Enolase                                                                                            | 9371.84  | 146.45   | 63.99 |       |
| HEM6_PSEA7  | 10 (7)  | 546.18 | Oxygen-dependent coproporphyrinogen-III oxidase<br>OS=Pseudomonas aeruginosa (strain PA7)          | 7.94E+04 | 4.65E+04 | 1.71  |       |
| LAP_PSEAB   | 10 (7)  | 536.63 | Aminopeptidase                                                                                     | 361.66   | 1.39E+04 |       | 38.43 |
| SYY2_PSEAE  | 14 (3)  | 534.97 | Tyrosine--tRNA ligase 2                                                                            | 3352.67  | 2189.08  | 1.53  |       |



|             |         |        |                                                                |          |          |       |       |
|-------------|---------|--------|----------------------------------------------------------------|----------|----------|-------|-------|
| CARB_PSEAE  | 17 (5)  | 534.96 | Carbamoyl-phosphate synthase large chain                       | 4274.34  | 56.71    | 75.37 |       |
| BAUC_PSEAE  | 13 (8)  | 534.7  | Putative 3-oxopropanoate dehydrogenase                         | 1.16E+04 | 5702.66  | 2.03  |       |
| RPOD_PSEAE  | 12 (5)  | 529.54 | RNA polymerase sigma factor RpoD                               | 3536.64  | 449.03   | 7.88  |       |
| AROE_PSEAE  | 9 (6)   | 526.56 | Shikimate dehydrogenase (NADP(+))                              | 2.30E+04 | 4361.54  | 5.27  |       |
| HEM2_PSEAE  | 11 (7)  | 526.39 | Delta-aminolevulinic acid dehydratase                          | 7392.52  | 2.04E+04 |       | 2.76  |
| MURD_PSEAE  | 10 (8)  | 521.15 | UDP-N-acetylmuramoylalanine--D-glutamate ligase                | 2282.36  | 7232.95  |       | 3.17  |
| ILVD_PSEAB  | 9 (2)   | 515.39 | Dihydroxy-acid dehydratase                                     | 3035.39  | 1601.61  | 1.90  |       |
| LOLA_PSEAB  | 12 (10) | 512.57 | Outer-membrane lipoprotein carrier protein                     | 4338.49  | 8008.01  |       | 1.85  |
| PHZB1_PSEAE | 11 (3)  | 511.74 | Phenazine biosynthesis protein PhzB 1                          | 3693.52  | 3.85E+04 |       | 10.42 |
| CBPD_PSEAE  | 9 (8)   | 505.38 | Chitin-binding protein CbpD                                    | 2281.24  | 7.36E+04 |       | 32.26 |
| PYRG_PSEAB  | 8 (4)   | 498.33 | CTP synthase                                                   | 2109.01  | 238.92   | 8.83  |       |
| ISCS_PSEAB  | 11 (1)  | 494.04 | Cysteine desulfurase IscS                                      | 3242.41  | 1215.2   | 2.67  |       |
| RL9_PSEA7   | 9 (5)   | 491.4  | 50S ribosomal protein L9                                       | 2.60E+04 | 2342.63  | 11.10 |       |
| ACCC_PSEAE  | 11 (8)  | 490.03 | Biotin carboxylase                                             | 5405.52  | 684.58   | 7.90  |       |
| ACKA_PSEAB  | 12 (4)  | 489.17 | Acetate kinase                                                 | 1576.04  | 5418.9   |       | 3.44  |
| SYK_PSEAB   | 11 (4)  | 487.08 | Lysine--tRNA ligase                                            | 3734.84  | 702.91   | 5.31  |       |
| FPTA_PSEAE  | 9 (9)   | 482.99 | Fe(3+)-pyochelin receptor                                      | 136.64   | 3619.43  |       | 26.49 |
| GLMS_PSEAE  | 11 (7)  | 480.61 | Glutamine--fructose-6-phosphate aminotransferase [isomerizing] | 3509.06  | 2118.11  | 1.66  |       |
| RL25_PSEA8  | 8 (7)   | 479.28 | 50S ribosomal protein L25                                      | 3.44E+04 | 1172.63  | 29.34 |       |
| ASPA_PSEAE  | 11 (7)  | 472.83 | Aspartate ammonia-lyase                                        | 7114.87  | 478.9    | 14.86 |       |
| PAL_PSEAE   | 8 (6)   | 468.2  | Peptidoglycan-associated lipoprotein                           | 4700     | 1.98E+04 |       | 4.21  |
| AK_PSEAE    | 10 (4)  | 467.18 | Aspartokinase                                                  | 6926.54  | 1.29E+04 |       | 1.86  |
| HISX_PSEAE  | 8 (5)   | 466.08 | Histidinol dehydrogenase                                       | 2434.54  | 243.71   | 9.99  |       |
| IPYR_PSEAE  | 9 (7)   | 462.95 | Inorganic pyrophosphatase                                      | 7680.67  | 1.38E+04 |       | 1.80  |
| HIS1_PSEA8  | 8 (4)   | 449.5  | ATP phosphoribosyltransferase                                  | 1569.01  | 2027.14  |       | 1.29  |
| PROA_PSEAE  | 7 (4)   | 448.62 | Gamma-glutamyl phosphate reductase                             | 2913.78  | 8635.6   |       | 2.96  |
| PYS2_PSEAE  | 12 (8)  | 440.27 | Pyocin-S2                                                      | 6820.92  | 227.67   | 29.96 |       |
| TOLB_PSEAE  | 9 (6)   | 437.59 | Protein TolB                                                   | 917.54   | 3460.78  |       | 3.77  |
| Y1579_PSEAE | 10 (9)  | 433.91 | Uncharacterized protein PA1579                                 | 3092.79  | 1.61E+04 |       | 5.21  |
| PURE_PSEAE  | 6 (5)   | 431.48 | N5-carboxyaminoimidazole ribonucleotide mutase                 | 6625.53  | 8908.4   |       | 1.34  |

|             |        |        |                                                            |          |          |        |       |
|-------------|--------|--------|------------------------------------------------------------|----------|----------|--------|-------|
| GREA_PSEAE  | 8 (6)  | 429.23 | Transcription elongation factor GreA 1                     | 6852.59  | 282.36   | 24.27  |       |
| ZIPA_PSEAB  | 8 (7)  | 428.43 | Cell division protein ZipA                                 | 1391.64  | 7446.9   |        | 5.35  |
| PPSA_PSEAB  | 10 (8) | 422.12 | Phosphoenolpyruvate synthase                               | 4710.88  | 484.98   | 9.71   |       |
| RS2_PSEAB   | 9 (3)  | 417.1  | 30S ribosomal protein S2                                   | 5398.89  | 29.49    | 183.08 |       |
| HUTH_PSEAB  | 8 (6)  | 404.58 | Histidine ammonia-lyase                                    | 303.11   | 2950.2   |        | 9.73  |
| PHZB2_PSEAB | 9 (3)  | 400.05 | Phenazine biosynthesis protein PhzB 2                      | 819.05   | 1.01E+04 |        | 12.33 |
| GATB_PSEAB  | 10 (3) | 399.14 | Aspartyl/glutamyl-tRNA(Asn/Gln) amidotransferase subunit B | 1063.97  | 1.03E+04 |        | 9.68  |
| CYSNC_PSEAE | 8 (6)  | 399.14 | Bifunctional enzyme CysN/CysC                              | 256.56   | 4029     |        | 15.70 |
| SSB_PSEAE   | 8 (4)  | 398.46 | Single-stranded DNA-binding protein                        | 1.76E+04 | 1.25E+04 | 1.41   |       |
| RS10_PSEA7  | 7 (4)  | 385.93 | 30S ribosomal protein S10                                  | 1.59E+04 | 619.34   | 25.67  |       |
| SPUE_PSEAE  | 12 (9) | 385.69 | Spermidine-binding periplasmic protein SpuE                | 3858.28  | 1.04E+04 |        | 2.70  |
| MTIP_PSEAE  | 8 (7)  | 383.15 | S-methyl-5'-thioinosine phosphorylase                      | 1629.94  | 8302.92  |        | 5.09  |
| CYSD_PSEAB  | 11 (2) | 381.18 | Sulfate adenyltransferase subunit 2                        | 4382.24  | 948.13   | 4.62   |       |
| PURA_PSEAB  | 8 (4)  | 375.32 | Adenylosuccinate synthetase                                | 2205.54  | 1766.46  | 1.25   |       |
| PPIA_PSEAE  | 7 (7)  | 375.06 | Peptidyl-prolyl cis-trans isomerase A                      | 5579.05  | 4801.79  | 1.16   |       |
| PYRC_PSEAB  | 7 (7)  | 374.63 | Dihydroorotase                                             | 1907.53  | 1.11E+04 |        | 5.82  |
| GUAA_PSEAB  | 10 (4) | 374.54 | GMP synthase [glutamine-hydrolyzing]                       | 1.17E+04 | 3363.19  | 3.48   |       |
| ALGC_PSEAB  | 9 (7)  | 374.19 | Phosphomannomutase/phosphoglucomutase                      | 6450.39  | 5666.1   | 1.14   |       |
| RS8_PSEA7   | 6 (4)  | 371.88 | 30S ribosomal protein S8                                   | 1.52E+04 | 511.84   | 29.70  |       |
| MMSB_PSEAE  | 9 (7)  | 370.14 | 3-hydroxyisobutyrate dehydrogenase                         | 2.29E+04 | 1.52E+04 | 1.51   |       |
| AAT_PSEAE   | 7 (7)  | 369.8  | Aspartate aminotransferase                                 | 2845.42  | 1440.21  | 1.98   |       |
| HISZ_PSEAB  | 8 (2)  | 367.57 | ATP phosphoribosyltransferase regulatory subunit           | 637.16   | 2875.68  |        | 4.51  |
| RL3_PSEA7   | 10 (8) | 367.52 | 50S ribosomal protein L3                                   | 4.71E+04 | 1.01E+04 | 4.66   |       |
| SODF_PSEAE  | 7 (5)  | 365.03 | Superoxide dismutase [Fe]                                  | 4557.07  | 1.49E+04 |        | 3.27  |
| FABG_PSEAE  | 7 (4)  | 363.29 | 3-oxoacyl-[acyl-carrier-protein] reductase FabG            | 4280.9   | 750.09   | 5.71   |       |
| EDD_PSEAE   | 8 (6)  | 363.17 | Phosphogluconate dehydratase                               | 2545.09  | 4853.12  |        | 1.91  |
| GRPE_PSEAB  | 8 (3)  | 360.42 | Protein GrpE                                               | 1.06E+04 | 192.55   | 55.05  |       |
| RS5_PSEA7   | 5 (2)  | 359.03 | 30S ribosomal protein S5                                   | 2189.79  | 189.49   | 11.56  |       |
| BAUA_PSEAE  | 10 (7) | 356.41 | Beta-alanine--pyruvate aminotransferase                    | 7797.8   | 3972.97  | 1.96   |       |
| PUR8_PSEAE  | 9 (9)  | 356.25 | Adenylosuccinate lyase                                     | 719.1    | 2851     |        | 3.96  |

|             |        |        |                                                                       |          |          |       |       |
|-------------|--------|--------|-----------------------------------------------------------------------|----------|----------|-------|-------|
| ILVE_PSEAE  | 8 (7)  | 353.35 | Branched-chain-amino-acid aminotransferase                            | 1.11E+04 | 4.01E+04 |       | 3.61  |
| NUSG_PSEAE  | 6 (1)  | 352.87 | Transcription termination/antitermination protein NusG                | 3769.35  | 295.54   | 12.75 |       |
| ARGB_PSEAB  | 8 (2)  | 350.4  | Acetylglutamate kinase                                                | 1407.19  | 843.43   | 1.67  |       |
| MURE_PSEAE  | 7 (3)  | 347.91 | UDP-N-acetylmuramoyl-L-alanyl-D-glutamate--2,6-diaminopimelate ligase | 233.14   | 2707.22  |       | 11.61 |
| G6PI_PSEA8  | 8 (6)  | 347.69 | Glucose-6-phosphate isomerase                                         | 900.53   | 7978.78  |       | 8.86  |
| NOSZ_PSEAI  | 11 (1) | 345.38 | Nitrous-oxide reductase                                               | 102.48   | 816.92   |       | 7.97  |
| DAPD_PSEAE  | 7 (7)  | 345.26 | 2,3,4,5-tetrahydropyridine-2,6-dicarboxylate N-succinyltransferase    | 4574.06  | 1041.22  | 4.39  |       |
| TOP1_PSEAE  | 9 (7)  | 342.14 | DNA topoisomerase 1                                                   | 5434.46  | 1.02E+04 |       | 1.88  |
| PYRX_PSEAE  | 8 (5)  | 337.5  | Dihydroorotase-like protein                                           | 1353.08  | 1692.15  |       | 1.25  |
| SYGB_PSEAB  | 5 (4)  | 335.09 | Glycine--tRNA ligase beta subunit                                     | 3381.6   | 727.16   | 4.65  |       |
| KAD_PSEAB   | 6 (3)  | 332.88 | Adenylate kinase                                                      | 9846.38  | 957.53   | 10.28 |       |
| FABZ_PSEAB  | 9 (7)  | 326.25 | 3-hydroxyacyl-[acyl-carrier-protein] dehydratase FabZ                 | 2523.95  | 1.17E+04 |       | 4.64  |
| APRA_PSEAE  | 6 (6)  | 324.37 | Serralysin                                                            | 665.08   | 3858.4   |       | 5.80  |
| RL18_PSEA7  | 7 (3)  | 323.31 | 50S ribosomal protein L18                                             | 4313.93  | 2363.28  | 1.83  |       |
| SECB_PSEAB  | 5 (5)  | 321.76 | Protein-export protein SecB                                           | 2.09E+04 | 7637.23  | 2.74  |       |
| RS7_PSEA7   | 8 (2)  | 319.43 | 30S ribosomal protein S7                                              | 8164.5   | 495.27   | 16.48 |       |
| THIG_PSEAB  | 6 (6)  | 313.52 | Thiazole synthase                                                     | 1.95E+04 | 2593.74  | 7.52  |       |
| SECA_PSEAB  | 8 (3)  | 312.31 | Protein translocase subunit SecA                                      | 2165.09  | 147.59   | 14.67 |       |
| PANB2_PSEAE | 5 (4)  | 310.09 | 3-methyl-2-oxobutanoate hydroxymethyltransferase 2                    | 4646.27  | 7204.85  |       | 1.55  |
| GSA_PSEAB   | 6 (3)  | 308.59 | Esterase EstA                                                         | 2324.77  | 566.97   | 4.10  |       |
| CYNS_PSEAE  | 7 (4)  | 308.59 | Cyanate hydratase                                                     | 767.64   | 3108.42  |       | 4.05  |
| PUR9_PSEA8  | 9 (8)  | 308.29 | Bifunctional purine biosynthesis protein PurH                         | 2924.4   | 1755.24  | 1.67  |       |
| OPGG_PSEAB  | 7 (4)  | 307.03 | Glucans biosynthesis protein G                                        | 4710.2   | 946.68   | 4.98  |       |
| RL19_PSEA7  | 5 (4)  | 301.84 | 50S ribosomal protein L19                                             | 1.15E+04 | 1085.68  | 10.59 |       |
| ATPG_PSEAB  | 11 (5) | 301.6  | ATP synthase gamma chain                                              | 2588.3   | 3084.65  |       | 1.19  |
| NUOG_PSEAE  | 7 (4)  | 301.58 | NADH-quinone oxidoreductase subunit G                                 | 1101.84  | 216.48   | 5.09  |       |
| CYC4_PSEAE  | 6 (4)  | 301.26 | Cytochrome c4                                                         | 5569.33  | 2223.33  | 2.50  |       |
| PYRE_PSEAB  | 6 (4)  | 296.96 | Orotate phosphoribosyltransferase                                     | 3017.47  | 2618.6   | 1.15  |       |
| SYW_PSEAE   | 7 (6)  | 293.25 | Tryptophan--tRNA ligase                                               | 2414.07  | 1554.06  | 1.55  |       |
| SYGA_PSEAB  | 5 (5)  | 291.48 | Glycine--tRNA ligase alpha subunit                                    | 8805.31  | 979.9    | 8.99  |       |

|             |        |        |                                                       |          |          |       |       |
|-------------|--------|--------|-------------------------------------------------------|----------|----------|-------|-------|
| PUR4_PSEAE  | 10 (4) | 288.88 | Phosphoribosylformylglycinamide synthase              | 5666.64  | 130.87   | 43.30 |       |
| RL7_PSEA7   | 9 (6)  | 288.85 | 50S ribosomal protein L7/L12                          | 2.08E+04 | 7310.6   | 2.85  |       |
| GMHA_PSEAB  | 5 (5)  | 286.81 | Phosphoheptose isomerase                              | 4292.04  | 1.20E+04 |       | 2.80  |
| UVRA_PSEAE  | 7 (4)  | 285.55 | UvrABC system protein A                               | 1266.38  | 693.49   | 1.83  |       |
| FUR_PSEAE   | 3 (2)  | 283.46 | Ferric uptake regulation protein                      | 1.29E+04 | 5121.44  | 2.52  |       |
| PDXJ_PSEAB  | 5 (2)  | 280.06 | Pyridoxine 5'-phosphate synthase                      | 1008.04  | 2902.45  |       | 2.88  |
| SUHB_PSEAE  | 8 (6)  | 277.61 | Inositol-1-monophosphatase                            | 7710.16  | 4900.43  | 1.57  |       |
| CH10_PSEA7  | 5 (5)  | 273.93 | 10 kDa chaperonin                                     | 3.48E+04 | 2245.9   | 15.49 |       |
| FABB_PSEAB  | 6 (5)  | 273.58 | 3-oxoacyl-[acyl-carrier-protein] synthase 1           | 3605.89  | 1.24E+04 |       | 3.44  |
| RL2_PSEA7   | 7 (3)  | 272.99 | 50S ribosomal protein L2                              | 7562.94  | 1.39E+04 |       | 1.84  |
| HPPD_PSEAE  | 6 (4)  | 270.19 | 4-hydroxyphenylpyruvate dioxygenase                   | 2032.18  | 324.02   | 6.27  |       |
| NDK_PSEAB   | 9 (6)  | 269.16 | Nucleoside diphosphate kinase                         | 4.22E+04 | 5.43E+04 |       | 1.29  |
| RL21_PSEA8  | 5 (5)  | 267.51 | 50S ribosomal protein L21                             | 1.38E+04 | 189.32   | 72.89 |       |
| PH4H_PSEAE  | 4 (4)  | 265.85 | Phenylalanine-4-hydroxylase                           | 8581.27  | 8653.33  |       | 1.01  |
| EFP_PSEAB   | 5 (3)  | 265.36 | Elongation factor P                                   | 1.78E+04 | 1550.42  | 11.48 |       |
| GAP2_PSEAB  | 8 (6)  | 264.25 | Glyceraldehyde-3-phosphate dehydrogenase-like protein | 8538.69  | 6152.27  | 1.39  |       |
| MUCB_PSEAE  | 4 (3)  | 264.07 | Sigma factor AlgU regulatory protein MucB             | 86.16    | 3448.83  |       | 40.03 |
| PHS_PSEAB   | 5 (3)  | 262.73 | Putative pterin-4-alpha-carbinolamine dehydratase     | 1.43E+04 | 3.91E+04 |       | 2.73  |
| AHPF_PSEAE  | 5 (5)  | 261.53 | Alkyl hydroperoxide reductase subunit F               | 129.79   | 3833.34  |       | 29.53 |
| NUOCD_PSEAB | 7 (4)  | 260.42 | NADH-quinone oxidoreductase subunit C/D               | 1490.65  | 3686.29  |       | 2.47  |
| IF3_PSEAE   | 4 (3)  | 258.3  | Translation initiation factor IF-3                    | 5083.4   | 1056.79  | 4.81  |       |
| FLICA_PSEAI | 3 (1)  | 257.94 | A-type flagellin                                      | 1183.32  | 1826.27  |       | 1.54  |
| RISB_PSEAB  | 6 (6)  | 254.01 | 6,7-dimethyl-8-ribityllumazine synthase               | 8924.42  | 5092.8   | 1.75  |       |
| PSTS_PSEAB  | 5 (5)  | 249.8  | Phosphate-binding protein PstS                        | 3406.36  | 8035     |       | 2.36  |
| DEF_PSEAE   | 4 (4)  | 248.69 | Peptide deformylase                                   | 5040.04  | 5353.06  |       | 1.06  |
| AGUA_PSEAE  | 4 (2)  | 245.35 | Agmatine deiminase                                    | 719.85   | 2955.33  |       | 4.11  |
| GCH12_PSEAE | 4 (4)  | 244.05 | GTP cyclohydrolase 1 2                                | 650.87   | 4195.99  |       | 6.45  |
| ISPF_PSEAE  | 4 (1)  | 242.82 | 2-C-methyl-D-erythritol 2,4-cyclodiphosphate synthase | 1180.02  | 16.56    | 71.26 |       |
| TRPC_PSEAE  | 6 (2)  | 242.12 | Indole-3-glycerol phosphate synthase                  | 4666.46  | 1948.68  | 2.39  |       |
| SODM_PSEAE  | 6 (6)  | 240.83 | Superoxide dismutase [Mn]                             | 377.96   | 1.00E+04 |       | 26.46 |

|             |       |        |                                                    |          |          |        |      |
|-------------|-------|--------|----------------------------------------------------|----------|----------|--------|------|
| CY551_PSEAE | 4 (4) | 237.68 | Cytochrome c-551                                   | 4635     | 1.83E+04 |        | 3.95 |
| FABI_PSEAE  | 5 (4) | 236.8  | Enoyl-[acyl-carrier-protein] reductase [NADH] FabI | 471.25   | 2315.3   |        | 4.91 |
| GCSP1_PSEPK | 8 (1) | 236.71 | Glycine dehydrogenase (decarboxylating) 1          | 1826.72  | 1.07E+04 |        | 5.86 |
| T23O_PSEAB  | 4 (2) | 234.88 | Tryptophan 2,3-dioxygenase                         | 849.4    | 5067.08  |        | 5.97 |
| LEU1_PSEA7  | 5 (4) | 229.55 | 2-isopropylmalate synthase                         | 2290.18  | 1607.79  | 1.42   |      |
| DNAK_THISH  | 5 (1) | 228.67 | Chaperone protein DnaK                             | 2869.27  | 872.74   | 3.29   |      |
| NIRQ_PSEAE  | 5 (5) | 227.06 | Denitrification regulatory protein NirQ            | 9424.06  | 539.46   | 17.47  |      |
| RS6_PSEA7   | 6 (3) | 222.55 | 30S ribosomal protein S6                           | 9218.14  | 472.82   | 19.50  |      |
| RL23_PSEA7  | 6 (3) | 222.36 | 50S ribosomal protein L23                          | 8886.01  | 567.27   | 15.66  |      |
| LPXC_PSEAB  | 4 (3) | 221.99 | UDP-3-O-acyl-N-acetylglucosamine deacetylase       | 5291.29  | 1714.19  | 3.09   |      |
| GLMU_PSEAB  | 7 (5) | 221.43 | Bifunctional protein GlmU                          | 1.13E+04 | 2.70E+04 |        | 2.39 |
| F16PA_PSEA7 | 5 (3) | 220.18 | Fructose-1,6-bisphosphatase class 1                | 8668.13  | 1163.73  | 7.45   |      |
| ARLY_PSEAB  | 4 (4) | 216.67 | Argininosuccinate lyase                            | 1963.57  | 3394.87  |        | 1.73 |
| CCPR_PSEAE  | 5 (5) | 214.24 | Cytochrome c551 peroxidase                         | 8534.34  | 607.98   | 14.04  |      |
| DHOM_PSEAE  | 6 (5) | 214.23 | Homoserine dehydrogenase                           | 1579.1   | 2893.05  |        | 1.83 |
| SYM_PSEAB   | 3 (2) | 214.06 | Methionine--tRNA ligase                            | 2090.07  | 252.65   | 8.27   |      |
| KPRS_PSEAE  | 4 (3) | 213.02 | Ribose-phosphate pyrophosphokinase                 | 4318.36  | 42.56    | 101.47 |      |
| CHMU_PSEAE  | 4 (4) | 212.86 | Monofunctional chorismate mutase                   | 1215.21  | 3798.56  |        | 3.13 |
| RL4_PSEA7   | 4 (1) | 212.69 | 50S ribosomal protein L4                           | 6925.56  | 102.42   | 67.62  |      |
| RL15_PSEA7  | 4 (2) | 210.68 | 50S ribosomal protein L15                          | 4124.69  | 332.46   | 12.41  |      |
| SYE_PSEAB   | 5 (2) | 210.51 | Glutamate--tRNA ligase                             | 669.85   | 1862.97  |        | 2.78 |
| P5CR_PSEAE  | 5 (5) | 208.74 | Pyrroline-5-carboxylate reductase                  | 1917.75  | 209.7    | 9.15   |      |
| ALKD_PSEAE  | 5 (5) | 208.03 | 2-dehydro-3-deoxy-phosphogluconate aldolase        | 1.47E+04 | 1925.18  | 7.64   |      |
| GSHB_PSEAE  | 5 (3) | 207.1  | Glutathione synthetase                             | 3198.88  | 5093.39  |        | 1.59 |
| PYRB_PSEAB  | 5 (3) | 205.58 | Aspartate carbamoyltransferase                     | 5417.42  | 2886.34  | 1.88   |      |
| RL24_PSEA7  | 7 (3) | 205.32 | 50S ribosomal protein L24                          | 1.46E+04 | 103.14   | 141.56 |      |
| OADC_PSEAB  | 4 (3) | 203.56 | Oxaloacetate decarboxylase                         | 1196.42  | 2466.08  |        | 2.06 |
| ATPE_PSEAB  | 4 (3) | 202.98 | ATP synthase epsilon chain                         | 2613.41  | 6176.13  |        | 2.36 |
| DBHB_PSEAE  | 5 (3) | 201.83 | DNA-binding protein HU-beta                        | 1.90E+04 | 1628.08  | 11.67  |      |
| NUOB_PSEAB  | 3 (1) | 201.65 | NADH-quinone oxidoreductase subunit B              | 1580.26  | 15.56    | 101.56 |      |

|             |       |        |                                                  |          |          |       |       |
|-------------|-------|--------|--------------------------------------------------|----------|----------|-------|-------|
| HGD_PSEAE   | 6 (6) | 201.51 | Homogentisate 1,2-dioxygenase                    | 699.17   | 2087.85  |       | 2.99  |
| GLO2_PSEA8  | 4 (4) | 201.45 | Hydroxyacylglutathione hydrolase                 | 3325.61  | 9252.39  |       | 2.78  |
| CYSM_PSEAE  | 6 (3) | 199.57 | Cysteine synthase B                              | 4694.64  | 2035.45  | 2.31  |       |
| UBIC_PSEAE  | 4 (4) | 199.46 | Probable chorismate pyruvate-lyase               | 464.65   | 802.59   |       | 1.73  |
| HSCA_PSEAB  | 6 (3) | 199.31 | Chaperone protein HscA homolog                   | 2119.42  | 240.11   | 8.83  |       |
| Y4395_PSEAE | 3 (2) | 199.04 | UPF0234 protein PA4395                           | 5852.11  | 314.49   | 18.61 |       |
| PAGL_PSEAE  | 4 (3) | 196.43 | Lipid A deacylase PagL                           | 1112.22  | 2223.03  |       | 2.00  |
| UPP_PSEAB   | 5 (3) | 196.06 | Uracil phosphoribosyltransferase                 | 1364.21  | 21.56    | 63.28 |       |
| PYRR_PSEAB  | 4 (4) | 196.02 | Bifunctional protein PyrR                        | 6638.94  | 301.71   | 22.00 |       |
| UVRA_PSEPK  | 5 (1) | 190.1  | UvrABC system protein A                          | 2079.55  | 443.92   | 4.68  |       |
| DNAJ_PSEAB  | 9 (6) | 189.58 | Chaperone protein DnaJ                           | 1108.13  | 962.7    | 1.15  |       |
| DUT_PSEAB   | 2 (2) | 187.92 | Deoxyuridine 5'-triphosphate nucleotidohydrolase | 885.93   | 2594.76  |       | 2.93  |
| ALGP_PSEAE  | 4 (3) | 180.07 | Transcriptional regulatory protein AlgP          | 3460.67  | 4305.7   |       | 1.24  |
| PNCB2_PSEAE | 3 (2) | 179.69 | Nicotinate phosphoribosyltransferase 2           | 57.57    | 581.27   |       | 10.10 |
| HFQ_PSEAB   | 4 (2) | 179.57 | RNA-binding protein Hfq                          | 6272.4   | 4.38E+04 |       | 6.98  |
| NAPA_PSEAB  | 5 (2) | 179.4  | Periplasmic nitrate reductase                    | 38.79    | 1531.11  |       | 39.47 |
| APEB_PSEAB  | 3 (2) | 179.26 | Probable M18 family aminopeptidase 2             | 436.66   | 1239.79  |       | 2.84  |
| FMNRE_PSEAE | 4 (4) | 177.67 | NAD(P)H-dependent FMN reductase PA1204           | 1157.94  | 4471.91  |       | 3.86  |
| ACEA_PSEAE  | 5 (4) | 174.66 | Isocitrate lyase                                 | 3426.69  | 269.08   | 12.73 |       |
| G3P_PSEAE   | 3 (1) | 172.02 | Glyceraldehyde-3-phosphate dehydrogenase         | 7721.55  | 556.35   | 13.88 |       |
| PDXY_PSEAB  | 3 (3) | 170.72 | Pyridoxal kinase PdxY                            | 2925.26  | 2658.48  | 1.10  |       |
| Y3753_PSEAE | 3 (3) | 168.5  | Uncharacterized protein PA3753                   | 918.25   | 4390.79  |       | 4.78  |
| NFUA_PSEAB  | 4 (3) | 168.33 | Fe/S biogenesis protein NfuA                     | 2747.53  | 4075.29  |       | 1.48  |
| DCDA_PSEAE  | 3 (3) | 168.33 | Diaminopimelate decarboxylase                    | 430.26   | 3381.71  |       | 7.86  |
| FTSZ_PSEAE  | 6 (5) | 167.25 | Cell division protein FtsZ                       | 1400.12  | 46.79    | 29.92 |       |
| TYSY_PSEAB  | 4 (3) | 166.33 | Thymidylate synthase                             | 4311.56  | 4173.57  | 1.03  |       |
| METZ_PSEAE  | 4 (3) | 165.23 | O-succinylhomoserine sulfhydrylase               | 800.28   | 2005.68  |       | 2.51  |
| PNCB1_PSEAE | 3 (1) | 165.15 | Nicotinate phosphoribosyltransferase             | 407.89   | 1227.82  |       | 3.01  |
| PDXH_PSEA7  | 5 (1) | 164.61 | Pyridoxine/pyridoxamine 5'-phosphate oxidase     | 8556.53  | 587.49   | 14.56 |       |
| PUR5_PSEA8  | 4 (3) | 163.41 | Phosphoribosylformylglycinamide cyclo-ligase     | 2.67E+04 | 1.36E+04 | 1.96  |       |

|             |       |        |                                                                 |          |          |        |       |
|-------------|-------|--------|-----------------------------------------------------------------|----------|----------|--------|-------|
| FABA_PSEAB  | 4 (2) | 163.39 | 3-hydroxydecanoyl-[acyl-carrier-protein] dehydratase            | 2941.59  | 3949.1   |        | 1.34  |
| ALF_PSEAE   | 3 (3) | 162.17 | Fructose-bisphosphate aldolase                                  | 2480.29  | 221.86   | 11.18  |       |
| ACCD_PSEAB  | 6 (3) | 161.08 | Acetyl-coenzyme A carboxylase carboxyl transferase subunit beta | 6844.21  | 783.29   | 8.74   |       |
| FDHE_PSEAE  | 3 (3) | 159.76 | Protein FdhE homolog                                            | 7444.65  | 736.46   | 10.11  |       |
| TRPB_PSEAE  | 5 (4) | 157.19 | Tryptophan synthase beta chain                                  | 1226.67  | 6153.16  |        | 5.02  |
| GCH1L_PSEAE | 4 (4) | 153.56 | GTP cyclohydrolase 1 type 2 homolog                             | 2155.87  | 3086.75  |        | 1.43  |
| ARGJ_PSEAE  | 4 (4) | 146.87 | Arginine biosynthesis bifunctional protein ArgJ                 | 1.14E+04 | 2200.54  | 5.18   |       |
| FADB_PSEAB  | 5 (1) | 146.76 | Fatty acid oxidation complex subunit alpha                      | 4032.63  | 132.43   | 30.45  |       |
| BCCP_PSEAE  | 3 (3) | 146.67 | Biotin carboxyl carrier protein of acetyl-CoA carboxylase       | 2.33E+04 | 1.11E+04 | 2.10   |       |
| ATSE4_PSEAE | 4 (4) | 146.62 | Acetyltransferase PA5475                                        | 4369.71  | 5919.42  |        | 1.35  |
| FER_PSEAE   | 2 (2) | 144.86 | 2Fe-2S ferredoxin                                               | 4087.14  | 162.25   | 25.19  |       |
| COAD_PSEAB  | 4 (3) | 142.89 | Phosphopantetheine adenylyltransferase                          | 4113.36  | 3510.1   | 1.17   |       |
| Y3332_PSEAE | 3 (3) | 141.81 | Uncharacterized PhzA/B-like protein PA3332                      | 37.56    | 2535.05  |        | 67.49 |
| SYT_PSEA7   | 4 (3) | 140.92 | Threonine--tRNA ligase                                          | 937.19   | 185.62   | 5.05   |       |
| BETB_PSEAE  | 3 (2) | 139.05 | NAD/NADP-dependent betaine aldehyde dehydrogenase               | 775.85   | 278.03   | 2.79   |       |
| HSLO_PSEAB  | 3 (3) | 137.45 | 33 kDa chaperonin                                               | 3776.46  | 857.72   | 4.40   |       |
| ESTA_PSEAE  | 2 (2) | 136.7  | Esterase EstA                                                   | 618.59   | 1806.23  |        | 2.92  |
| GCSH1_PSEAE | 3 (3) | 135.41 | Glycine cleavage system H protein 1                             | 2483.83  | 7982.1   |        | 3.21  |
| PDXJ_PSEA7  | 3 (1) | 134.18 | Pyridoxine 5'-phosphate synthase                                | 284.59   | 584.66   |        | 2.05  |
| ASTB_PSEAB  | 5 (4) | 132.75 | N-succinylarginine dihydrolase                                  | 1737.72  | 5566.77  |        | 3.20  |
| RS14_PSEA7  | 3 (2) | 131.78 | 30S ribosomal protein S14                                       | 4416.98  | 32.78    | 134.75 |       |
| HSLU_PSEAB  | 7 (1) | 131.09 | ATP-dependent protease ATPase subunit HslU                      | 819.86   | 243.01   | 3.37   |       |
| THRC_PSEAE  | 5 (2) | 130.43 | Threonine synthase                                              | 572.32   | 5.61     | 102.02 |       |
| DLDH3_PSEAE | 5 (3) | 129.96 | Dihydropolpyl dehydrogenase 3                                   | 185.38   | 1944.35  |        | 10.49 |
| TPIS_PSEAB  | 2 (2) | 127.71 | Triosephosphate isomerase                                       | 2016.58  | 971.26   | 2.08   |       |
| PILH_PSEAE  | 2 (2) | 127.47 | Protein PilH                                                    | 3330.2   | 91.73    | 36.30  |       |
| PURK_PSEAE  | 3 (2) | 127.06 | N5-carboxyaminoimidazole ribonucleotide synthase                | 1988.81  | 1191.36  | 1.67   |       |
| RDGC_PSEAB  | 4 (3) | 126.78 | Recombination-associated protein RdgC                           | 5110.12  | 150.05   | 34.06  |       |
| CLPX_PSEAB  | 3 (1) | 126.46 | ATP-dependent Clp protease ATP-binding subunit ClpX             | 1755.7   | 35.23    | 49.84  |       |
| RNPA_PSEA7  | 3 (2) | 125.35 | Ribonuclease P protein component                                | 572.23   | 706.31   |        | 1.23  |

|             |       |        |                                              |          |          |        |        |
|-------------|-------|--------|----------------------------------------------|----------|----------|--------|--------|
| RL20_PSEA7  | 2 (2) | 124.51 | 50S ribosomal protein L20                    | 4549.15  | 149.21   | 30.49  |        |
| HEM3_PSEA8  | 3 (3) | 123.98 | Porphobilinogen deaminase                    | 703.1    | 85.94    | 8.18   |        |
| HIS7_PSEA7  | 3 (3) | 122.74 | Imidazoleglycerol-phosphate dehydratase      | 1699.09  | 1411.35  | 1.20   |        |
| PYRH_PSEAB  | 4 (2) | 121.52 | Uridylate kinase                             | 5858.33  | 2369.29  | 2.47   |        |
| ATPD_PSEAB  | 2 (1) | 121.01 | ATP synthase subunit delta                   | 5651.24  | 605.1    | 9.34   |        |
| RS3_PSEA7   | 3 (3) | 120.71 | 30S ribosomal protein S3                     | 5550.87  | 386.98   | 14.34  |        |
| SKPL_PSEAE  | 2 (1) | 119.62 | Skp-like protein                             | 7201.45  | 3958.74  | 1.82   |        |
| RNPH_PSEAB  | 3 (2) | 119.36 | Ribonuclease PH                              | 828.99   | 2737.87  |        | 3.30   |
| RL16_PSEA7  | 3 (3) | 118.83 | 50S ribosomal protein L16                    | 2088.51  | 282.23   | 7.40   |        |
| RS9_PSEA7   | 2 (2) | 118.71 | 30S ribosomal protein S9                     | 7772.2   | 51.57    | 150.71 |        |
| MQO2_PSEAE  | 4 (4) | 117.72 | Probable malate:quinone oxidoreductase 2     | 1652.22  | 35.11    | 47.06  |        |
| UGND_PSEAE  | 2 (2) | 116.89 | UDP-N-acetyl-D-glucosamine 6-dehydrogenase   | 1824.62  | 684.39   | 2.67   |        |
| FLIA_PSEAE  | 5 (2) | 116.55 | RNA polymerase sigma factor FliA             | 1391.88  | 83.9     | 16.59  |        |
| PLPHP_PSEAE | 4 (2) | 116.3  | Pyridoxal phosphate homeostasis protein      | 740.64   | 3368.32  |        | 4.55   |
| RBFA_PSEAB  | 1 (1) | 113.78 | Ribosome-binding factor A                    | 277.96   | 881.27   |        | 3.17   |
| ACP1_PSEAE  | 2 (1) | 113.52 | Acyl carrier protein 1                       | 3.51E+04 | 9.06E+04 |        | 2.58   |
| FER1_PSEAE  | 2 (2) | 112.77 | Ferredoxin 1                                 | 2999.61  | 3890.47  |        | 1.30   |
| PTA_PSEAE   | 6 (1) | 112.74 | Phosphate acetyltransferase                  | 20.38    | 5532.15  |        | 271.45 |
| TRMB_PSEAB  | 3 (2) | 112.41 | tRNA (guanine-N(7)-)-methyltransferase       | 2435.77  | 118.74   | 20.51  |        |
| ELAS_PSEAB  | 2 (2) | 112.2  | Elastase                                     | 657.19   | 917.64   |        | 1.40   |
| OTCA_PSEAE  | 7 (5) | 111.83 | Ornithine carbamoyltransferase, anabolic     | 1.31E+04 | 1.01E+05 |        | 7.71   |
| PDXA_PSEAE  | 2 (2) | 111.7  | 4-hydroxythreonine-4-phosphate dehydrogenase | 795.7    | 1318.83  |        | 1.66   |
| MSRA_PSEAB  | 3 (3) | 109.5  | Peptide methionine sulfoxide reductase MsrA  | 1659.92  | 3663.09  |        | 2.21   |
| ERPA_PSEAB  | 3 (3) | 107.76 | Iron-sulfur cluster insertion protein ErpA   | 1993.48  | 477.38   | 4.18   |        |
| RS13_PSEA7  | 2 (2) | 106.36 | 30S ribosomal protein S13                    | 8078.48  | 19.29    | 418.79 |        |
| THTR_PSEAE  | 2 (1) | 104.77 | Thiosulfate sulfurtransferase                | 1890.62  | 1308.38  | 1.45   |        |
| LGUL_PSEAE  | 2 (2) | 103.15 | Lactoylglutathione lyase                     | 1322.72  | 3549.79  |        | 2.68   |
| AROC_PSEAB  | 2 (2) | 102.53 | Chorismate synthase                          | 33.43    | 1295.61  |        | 38.76  |
| Y2770_PSEAE | 3 (2) | 101.27 | Uncharacterized isomerase PA2770             | 7847.34  | 2.86E+04 |        | 3.64   |
| ALR2_PSEAE  | 4 (2) | 97.72  | Alanine racemase, catabolic                  | 2555.9   | 3655.8   |        | 1.43   |



|             |       |       |                                                                                                    |          |          |       |      |
|-------------|-------|-------|----------------------------------------------------------------------------------------------------|----------|----------|-------|------|
| QOR_PSEAE   | 2 (1) | 96.3  | Quinone oxidoreductase                                                                             | 308.94   | 51.32    | 6.02  |      |
| SYFB_PSEAE  | 3 (2) | 95.85 | Phenylalanine--tRNA ligase beta subunit                                                            | 1069.12  | 23.95    | 44.64 |      |
| HCP1_PSEAE  | 2 (2) | 95.55 | Protein hcp1                                                                                       | 1.35E+04 | 491.94   | 27.44 |      |
| AROB_PSEAB  | 3 (1) | 93.69 | 3-dehydroquinate synthase                                                                          | 807.18   | 812.2    |       | 1.01 |
| Y329_PSEAE  | 2 (2) | 93.19 | UPF0339 protein PA0329                                                                             | 3762.47  | 1884.88  | 2.00  |      |
| ASTD_PSEAE  | 2 (2) | 91.56 | N-succinylglutamate 5-semialdehyde dehydrogenase                                                   | 627.2    | 12.16    | 51.58 |      |
| RS20_PSEA7  | 1 (1) | 91.16 | 30S ribosomal protein S20                                                                          | 1.85E+04 | 6527.01  | 2.83  |      |
| PUR7_PSEA7  | 4 (1) | 90.85 | Phosphoribosylaminoimidazole-succinocarboxamide synthase                                           | 1968.6   | 1.05E+04 |       | 5.33 |
| AROQ1_PSEAE | 2 (1) | 89.87 | 3-dehydroquinate dehydratase 1                                                                     | 1767.22  | 6600.29  |       | 3.73 |
| CAPP_PSEAE  | 5 (5) | 89.45 | Phosphoenolpyruvate carboxylase                                                                    | 1858.88  | 1442.91  | 1.29  |      |
| PYS1_PSEAI  | 3 (1) | 89.41 | Pyocin-S1                                                                                          | 1982.89  | 302.83   | 6.55  |      |
| PUR1_PSEAE  | 3 (3) | 89.14 | Amidophosphoribosyltransferase                                                                     | 514.49   | 35.44    | 14.52 |      |
| ASSY_PSEAB  | 4 (2) | 87.93 | Argininosuccinate synthase                                                                         | 1471.97  | 26.29    | 55.99 |      |
| CHEZ_PSEAB  | 4 (4) | 83.19 | Protein phosphatase CheZ                                                                           | 3622.56  | 244.4    | 14.82 |      |
| HIS4_PSEA7  | 3 (3) | 83.18 | 1-(5-phosphoribosyl)-5-[[5-phosphoribosylamino)methylideneamino] imidazole-4-carboxamide isomerase | 3595.37  | 295.57   | 12.16 |      |
| PMPR_PSEAE  | 3 (2) | 82.44 | Transcriptional regulatory protein PmpR                                                            | 9713.42  | 557.21   | 17.43 |      |
| RL17_PSEA7  | 4 (3) | 79.89 | 50S ribosomal protein L17                                                                          | 4962.1   | 239.24   | 20.74 |      |
| PTSN_PSEAE  | 2 (2) | 79.88 | Nitrogen regulatory protein                                                                        | 1279.24  | 254.81   | 5.02  |      |
| NIRC_PSEAE  | 1 (1) | 78.24 | Cytochrome c55X                                                                                    | 454.71   | 2994.13  |       | 6.58 |
| ECOT_PSEAB  | 4 (3) | 78.2  | Ecotin                                                                                             | 2883.57  | 337.12   | 8.55  |      |
| HEMN_PSEAE  | 2 (1) | 77.13 | Oxygen-independent coproporphyrinogen III oxidase                                                  | 546.39   | 25.59    | 21.35 |      |
| SYP_PSEAB   | 3 (3) | 77.02 | Proline--tRNA ligase                                                                               | 1167.02  | 1177.59  |       | 1.01 |
| ALGR_PSEAE  | 3 (2) | 76.95 | Positive alginate biosynthesis regulatory protein                                                  | 1922.49  | 36.2     | 53.11 |      |
| LDC_PSEAE   | 1 (1) | 76.81 | Murein tetrapeptide carboxypeptidase                                                               | 785.13   | 5582.07  |       | 7.11 |
| Y4465_PSEAE | 4 (4) | 76.55 | Nucleotide-binding protein PA4465                                                                  | 954.73   | 450.85   | 2.12  |      |
| MURC_PSEAB  | 2 (2) | 76.49 | UDP-N-acetylmuramate--L-alanine ligase                                                             | 198.42   | 37.37    | 5.31  |      |
| AROB_PSEA7  | 3 (1) | 76.39 | 3-dehydroquinate synthase                                                                          | 1383.22  | 1864.43  |       | 1.35 |
| NDPA_PSEAB  | 3 (3) | 74.33 | Nucleoid-associated protein PA14_59050                                                             | 1.12E+04 | 4171.22  | 2.69  |      |
| RSMH_PSEAB  | 2 (2) | 74.04 | Ribosomal RNA small subunit methyltransferase H                                                    | 2632.02  | 6090.72  |       | 2.31 |

|             |       |       |                                                                |         |         |        |       |
|-------------|-------|-------|----------------------------------------------------------------|---------|---------|--------|-------|
| ASTE_PSEAB  | 2 (2) | 73.64 | Succinylglutamate desuccinylase                                | 547.73  | 911.31  |        | 1.66  |
| OPRI_PSEAE  | 1 (1) | 73.23 | Major outer membrane lipoprotein                               | 593.53  | 1177.49 |        | 1.98  |
| HEMTB_PSEAB | 2 (1) | 73.2  | Bacteriohemerythrin                                            | 222.85  | 277.57  |        | 1.25  |
| AMIC_PSEAE  | 1 (1) | 71.97 | Aliphatic amidase expression-regulating protein                | 154.2   | 811.66  |        | 5.26  |
| ALR1_PSEAE  | 2 (2) | 71.6  | Alanine racemase, biosynthetic                                 | 391     | 818.68  |        | 2.09  |
| CATE_PSEAE  | 2 (1) | 71.02 | Catalase HP11                                                  | 0       | 744.58  |        | ∞     |
| LASA_PSEAE  | 2 (1) | 69.96 | Protease LasA                                                  | 696.03  | 718.52  |        | 1.03  |
| TRPA_PSEAB  | 3 (3) | 69.72 | Tryptophan synthase alpha chain                                | 2059.41 | 427.76  | 4.81   |       |
| IXTPA_PSEAE | 2 (2) | 68.67 | dITP/XTP pyrophosphatase                                       | 1111.43 | 29.87   | 37.21  |       |
| LTAE_PSEAE  | 2 (2) | 67.59 | Low specificity L-threonine aldolase                           | 4618.48 | 396.86  | 11.64  |       |
| APAG_PSEAB  | 1 (1) | 67.57 | Protein ApaG                                                   | 253.97  | 429.54  |        | 1.69  |
| KGUA_PSEAE  | 1 (1) | 66.64 | Guanylate kinase                                               | 2277.73 | 391.36  | 5.82   |       |
| Y4473_PSEAE | 2 (2) | 66.59 | UPF0307 protein PA4473                                         | 1061.95 | 269.02  | 3.95   |       |
| MRAZ_PSEA8  | 2 (1) | 66.13 | Transcriptional regulator MraZ                                 | 254.03  | 4263.43 |        | 16.78 |
| PUR2_PSEAE  | 2 (1) | 65.08 | Phosphoribosylamine--glycine ligase                            | 1943.18 | 471.82  | 4.12   |       |
| NQOR_PSEAE  | 1 (1) | 64.3  | NAD(P)H dehydrogenase (quinone)                                | 634.11  | 258.06  | 2.46   |       |
| TRPG_PSEAE  | 1 (1) | 64    | Anthranilate synthase component 2                              | 1026.84 | 116.99  | 8.78   |       |
| RPIA_PSEAB  | 2 (2) | 63.61 | Ribose-5-phosphate isomerase A                                 | 1813.36 | 8.45    | 214.60 |       |
| RSMG_PSEA7  | 2 (2) | 63.49 | Ribosomal RNA small subunit methyltransferase G                | 765.92  | 556.46  | 1.38   |       |
| Y2077_PSEAB | 1 (1) | 63.12 | STAS-domain containing protein PA14_20770                      | 76.5    | 1399.64 |        | 18.30 |
| SYFA_PSEAB  | 2 (2) | 61.17 | Phenylalanine--tRNA ligase alpha subunit                       | 214.5   | 24.69   | 8.69   |       |
| AMIE_PSEAB  | 3 (1) | 60.57 | Aliphatic amidase                                              | 408.8   | 63.93   | 6.39   |       |
| PURT_PSEAB  | 5 (2) | 59.72 | Formate-dependent phosphoribosylglycinamide formyltransferase  | 606.52  | 49.55   | 12.24  |       |
| HIS3_PSEA7  | 1 (1) | 59.71 | Phosphoribosyl-AMP cyclohydrolase                              | 1819.37 | 4736.25 |        | 2.60  |
| RS17_PSEA7  | 1 (1) | 59.19 | 30S ribosomal protein S17                                      | 5020.08 | 1528.56 | 3.28   |       |
| GCSH2_PSEAE | 2 (1) | 59.12 | Glycine cleavage system H protein 2                            | 1431.52 | 4090.73 |        | 2.86  |
| ARNB_PSEAB  | 3 (1) | 58.94 | UDP-4-amino-4-deoxy-L-arabinose--oxoglutarate aminotransferase | 70.78   | 1354.06 |        | 19.13 |
| IVY_PSEAE   | 1 (1) | 58.69 | Inhibitor of vertebrate lysozyme                               | 558.75  | 3890.5  |        | 6.96  |
| PHEA_PSEAE  | 1 (1) | 58.21 | P-protein                                                      | 1036.89 | 506.92  | 2.05   |       |
| COBW_PSEAE  | 2 (1) | 57.18 | Protein CobW                                                   | 958.69  | 57.57   | 16.65  |       |

|             |       |       |                                                                                     |         |         |        |        |
|-------------|-------|-------|-------------------------------------------------------------------------------------|---------|---------|--------|--------|
| RS18_PSEA7  | 1 (1) | 56.52 | 30S ribosomal protein S18                                                           | 898.85  | 0       | ∞      |        |
| NQRF_PSEAB  | 2 (2) | 56.13 | Na(+)-translocating NADH-quinone reductase subunit F                                | 14.13   | 1829.7  |        | 129.49 |
| YGFB_PSEAE  | 1 (1) | 55.74 | UPF0149 protein PA5225                                                              | 1686.3  | 386.62  | 4.36   |        |
| FOLD_PSEAB  | 1 (1) | 55.73 | Bifunctional protein FoID                                                           | 5147.58 | 3707.66 | 1.39   |        |
| RL31_PSEA7  | 1 (1) | 55.57 | 50S ribosomal protein L31                                                           | 7196.89 | 126.34  | 56.96  |        |
| QUEA_PSEAB  | 3 (2) | 54.59 | S-adenosylmethionine:tRNA ribosyltransferase-isomerase                              | 253.26  | 635.55  |        | 2.51   |
| LASA_PSEAB  | 1 (1) | 53.96 | Protease LasA                                                                       | 699.26  | 1475.58 |        | 2.11   |
| CHEB1_PSEAE | 3 (1) | 53.46 | Chemotaxis response regulator protein-glutamate methyltransferase of group 1 operon | 741.33  | 2.16    | 343.21 |        |
| GBUA_PSEAE  | 1 (1) | 52.37 | Guanidinobutyrase                                                                   | 804.37  | 1517.39 |        | 1.89   |
| CYC5_PSEME  | 1 (1) | 51.93 | Cytochrome c5                                                                       | 1519.49 | 2966.64 |        | 1.95   |
| RMLC_PSEAE  | 2 (2) | 50.79 | dTDP-4-dehydrorhamnose 3,5-epimerase                                                | 618.57  | 513.48  | 1.20   |        |
| KYNB_PSEAB  | 1 (1) | 49.67 | Kynurenine formamidase                                                              | 2420.57 | 4093.52 |        | 1.69   |
| SYT_PSEAB   | 3 (1) | 48.07 | Threonine--tRNA ligase                                                              | 0       | 225.17  |        | ∞      |
| MOAC_PSEAB  | 1 (1) | 47.72 | Cyclic pyranopterin monophosphate synthase                                          | 1626.22 | 497.26  | 3.27   |        |
| NADC_PSEAE  | 2 (2) | 46.2  | Nicotinate-nucleotide pyrophosphorylase [carboxylating]                             | 1035.79 | 30.04   | 34.48  |        |
| FABV_PSEAB  | 2 (1) | 46.19 | Enoyl-[acyl-carrier-protein] reductase [NADH]                                       | 855.32  | 59.28   | 14.43  |        |
| DCUP_PSEA7  | 2 (2) | 44.77 | Uroporphyrinogen decarboxylase                                                      | 306.4   | 92.32   | 3.32   |        |
| COAX_PSEAB  | 2 (1) | 43.78 | Type III pantothenate kinase                                                        | 1428.43 | 77.53   | 18.42  |        |
| GLMM_PSEA7  | 3 (1) | 42.24 | Phosphoglucosamine mutase                                                           | 516.08  | 132.5   | 3.89   |        |
| RF2_PSEAE   | 1 (1) | 42.22 | Peptide chain release factor 2                                                      | 351.15  | 9.24    | 38.00  |        |
| CATB_PSEAE  | 1 (1) | 41.77 | Catalase                                                                            | 0       | 1034.29 |        | ∞      |
| Y2116_PSEAE | 1 (1) | 41.66 | Putative hydro-lyase PA2116                                                         | 2164.19 | 1109.28 | 1.95   |        |
| MTNA_PSEAB  | 1 (1) | 41.2  | Methylthioribose-1-phosphate isomerase                                              | 578.77  | 383.65  | 1.51   |        |
| RL30_PSEA7  | 1 (1) | 40.6  | 50S ribosomal protein L30                                                           | 568.91  | 2       | 284.46 |        |
| MUPP_PSEAE  | 1 (1) | 39.33 | N-acetylmuramic acid 6-phosphate phosphatase                                        | 145.67  | 23.31   | 6.25   |        |
| GCH11_PSEAE | 1 (1) | 38.98 | GTP cyclohydrolase 1 1                                                              | 1266.16 | 3092.33 |        | 2.44   |
| CARA_PSEAE  | 1 (1) | 38.94 | Carbamoyl-phosphate synthase small chain                                            | 450.26  | 0       | ∞      |        |
| PORB_PSEAE  | 2 (1) | 38.92 | Porin B                                                                             | 104.61  | 585.09  |        | 5.59   |
| ASTA_PSEAE  | 1 (1) | 37.96 | Arginine N-succinyltransferase subunit alpha                                        | 236.83  | 0       | ∞      |        |
| RL32_PSEA7  | 1 (1) | 37.96 | 50S ribosomal protein L32                                                           | 6017.55 | 109.37  | 55.02  |        |

|             |       |       |                                              |         |         |       |      |
|-------------|-------|-------|----------------------------------------------|---------|---------|-------|------|
| CHEY_PSEAE  | 1 (1) | 37.8  | Chemotaxis protein CheY                      | 2439.48 | 3156.78 |       | 1.29 |
| RPSH_PSEAE  | 1 (1) | 36.76 | RNA polymerase sigma-H factor                | 0       | 331.06  |       | ∞    |
| MINE_PSEAB  | 1 (1) | 33.94 | Cell division topological specificity factor | 264.42  | 6.05    | 43.71 |      |
| 6PGL_PSEAE  | 1 (1) | 33.85 | 6-phosphogluconolactonase                    | 142.16  | 815.64  |       | 5.74 |
| Y2112_PSEAE | 1 (1) | 33.27 | UPF0271 protein PA2112                       | 698.63  | 67.07   | 10.42 |      |
| Y3435_PSEAE | 2 (1) | 32.79 | Uncharacterized protein PA3435               | 491.17  | 409.24  | 1.20  |      |

**Supplementary Table S3. Cell-free secretome of *P. aeruginosa* CF isolate 5 following growth under normoxia and anoxia.** Data represents the average normalised abundances and fold increase from  $N=1$ . A fold change of 1.0 is indicative of no change between normoxia and anoxia. I5A = *P. aeruginosa* CF isolate 5 grown under anoxia. I5O = *P. aeruginosa* CF isolate 5 grown under normoxia.

| Accession   | Peptides (unique) | Score   | Description                                                      | Average Normalised Abundances |          | Fold increase |       |
|-------------|-------------------|---------|------------------------------------------------------------------|-------------------------------|----------|---------------|-------|
|             |                   |         |                                                                  | I5A                           | I5O      | I5A           | I5O   |
| FLICA_PSEAI | 22 (19)           | 1347.86 | A-type flagellin                                                 | 5.51E+05                      | 2.81E+05 | 1.96          |       |
| ELAS_PSEAE  | 18 (16)           | 1157.47 | Elastase                                                         | 1.04E+06                      | 3.42E+05 | 3.04          |       |
| CH60_PSEA7  | 21 (5)            | 910.31  | 60 kDa chaperonin                                                | 1.44E+04                      | 2.94E+04 |               | 2.04  |
| ASPQ_PSEAE  | 15 (15)           | 907.55  | Glutaminase-asparaginase                                         | 8691.33                       | 2.72E+04 |               | 3.13  |
| LAP_PSEAB   | 13 (11)           | 900.05  | Aminopeptidase                                                   | 5.03E+05                      | 1.34E+05 | 3.75          |       |
| PORF_PSEAE  | 10 (10)           | 884.59  | Outer membrane porin F                                           | 1.39E+05                      | 4.98E+04 | 2.79          |       |
| P5217_PSEAE | 13 (11)           | 821.83  | Probable binding protein component of ABC iron transporter PA521 | 1592.75                       | 2.12E+04 |               | 13.31 |
| DSBA_PSEAB  | 14 (10)           | 753.24  | Thiol:disulfide interchange protein DsbA                         | 2.33E+04                      | 9.48E+04 |               | 4.07  |
| ATPA_PSEAB  | 13 (2)            | 740.06  | ATP synthase subunit alpha                                       | 4351.48                       | 1.90E+04 |               | 4.37  |
| DAPA_PSEAE  | 11 (11)           | 696.03  | 4-hydroxy-tetrahydrodipicolinate synthase                        | 2854.76                       | 1.36E+04 |               | 4.76  |
| THIO_PSEAE  | 12 (11)           | 644.87  | Thioredoxin                                                      | 2.14E+04                      | 6.85E+04 |               | 3.20  |
| CBPD_PSEAB  | 13 (12)           | 604.43  | Chitin-binding protein CbpD                                      | 1.70E+06                      | 6.08E+05 | 2.80          |       |
| NIRS_PSEAE  | 10 (9)            | 601.5   | Nitrite reductase                                                | 1.53E+04                      | 1.47E+04 | 1.04          |       |

|             |         |        |                                                                                           |          |          |      |       |
|-------------|---------|--------|-------------------------------------------------------------------------------------------|----------|----------|------|-------|
| ATPA_PSEMY  | 12 (1)  | 585.79 | ATP synthase subunit alpha                                                                | 1216.18  | 1241.84  |      | 1.02  |
| LYSC_PSEAB  | 11 (11) | 579.89 | Lysyl endopeptidase                                                                       | 3.74E+05 | 1.75E+05 | 2.14 |       |
| Y1579_PSEAE | 9 (8)   | 577.11 | Uncharacterized protein PA1579                                                            | 4037.59  | 4.55E+04 |      | 11.27 |
| Y421_PSEA8  | 9 (9)   | 573.69 | UPF0312 protein PLES_04211                                                                | 8709.97  | 3.33E+04 |      | 3.82  |
| SAHH_PSEAB  | 12 (6)  | 542.94 | Adenosylhomocysteinase                                                                    | 467.69   | 5341.65  |      | 11.42 |
| BRAC_PSEAE  | 8 (7)   | 533.55 | Leucine-, isoleucine-, valine-, threonine-, and alanine-binding protein                   | 3.59E+04 | 1.08E+05 |      | 3.01  |
| EFG1_PSEAE  | 9 (7)   | 485.44 | Elongation factor G 1                                                                     | 1.35E+04 | 2.48E+04 |      | 1.84  |
| FLID1_PSEAI | 9 (8)   | 464.38 | A-type flagellar hook-associated protein 2                                                | 3.01E+04 | 3.23E+04 |      | 1.07  |
| AHPC_PSEAB  | 7 (7)   | 464.05 | Alkyl hydroperoxide reductase C                                                           | 2.68E+04 | 1.61E+05 |      | 6.01  |
| ATOB_PSEAE  | 11 (11) | 425.58 | Acetyl-CoA acetyltransferase                                                              | 4925.97  | 3.25E+04 |      | 6.60  |
| APRA_PSEAE  | 8 (8)   | 421.89 | Serralysin                                                                                | 2.45E+05 | 3.21E+04 | 7.63 |       |
| ARUC_PSEAE  | 7 (7)   | 418.12 | Succinylornithine transaminase/acetylornithine aminotransferase                           | 5284.31  | 2.41E+04 |      | 4.56  |
| METK_PSEAB  | 10 (4)  | 413.48 | S-adenosylmethionine synthase                                                             | 1114.67  | 5048.93  |      | 4.53  |
| ODP2_PSEAE  | 9 (7)   | 389.77 | Dihydrolipoyllysine-residue acetyltransferase component of pyruvate dehydrogenase complex | 2119.73  | 7432.06  |      | 3.51  |
| GGT_PSEAE   | 7 (6)   | 389.69 | Glutathione hydrolase proenzyme                                                           | 1.23E+04 | 9250.34  | 1.33 |       |
| LOLA_PSEAB  | 7 (7)   | 375.56 | Outer-membrane lipoprotein carrier protein                                                | 2161.36  | 6725.16  |      | 3.11  |
| Y3922_PSEAE | 7 (6)   | 369.63 | Uncharacterized protein PA3922                                                            | 5920.01  | 3.33E+04 |      | 5.62  |
| DLDH1_PSEAE | 9 (8)   | 366.92 | Dihydrolipoyl dehydrogenase                                                               | 3763.46  | 1.47E+04 |      | 3.91  |
| IPYR_PSEAE  | 5 (5)   | 366.06 | Inorganic pyrophosphatase                                                                 | 4847.01  | 2.83E+04 |      | 5.84  |
| Y329_PSEAE  | 4 (4)   | 362.05 | UPF0339 protein PA0329                                                                    | 4155.45  | 1.51E+04 |      | 3.63  |
| LASA_PSEAB  | 6 (6)   | 357.97 | Protease LasA                                                                             | 3.09E+05 | 1.04E+05 | 2.97 |       |
| SPUD_PSEAB  | 9 (7)   | 354.08 | Putrescine-binding periplasmic protein SpuD                                               | 9906.37  | 4.24E+04 |      | 4.28  |
| ATPB_PSEAB  | 7 (3)   | 351.44 | ATP synthase subunit beta                                                                 | 772.97   | 1.18E+04 |      | 15.27 |
| OTCC_PSEAE  | 8 (1)   | 349.8  | Ornithine carbamoyltransferase, catabolic                                                 | 1229.86  | 2997.71  |      | 2.44  |
| SSB_PSEAE   | 5 (4)   | 334.23 | Single-stranded DNA-binding protein                                                       | 5027.51  | 1.74E+04 |      | 3.46  |
| HUTU_PSEA7  | 6 (1)   | 329.11 | Urocanate hydratase                                                                       | 1554.81  | 1518.81  | 1.02 |       |
| CATA_PSEAE  | 7 (4)   | 315.14 | Catalase                                                                                  | 6818.79  | 3867.39  | 1.76 |       |
| FUMC1_PSEAE | 6 (6)   | 297.18 | Fumarate hydratase class II 1                                                             | 1736.54  | 6845.89  |      | 3.94  |
| CLPB_PSEAE  | 7 (7)   | 278.97 | Chaperone protein ClpB                                                                    | 2344.11  | 6898.33  |      | 2.94  |

|             |       |        |                                                       |          |          |      |       |
|-------------|-------|--------|-------------------------------------------------------|----------|----------|------|-------|
| OPRM_PSEAE  | 6 (4) | 277.92 | Outer membrane protein OprM                           | 3254.26  | 341.25   | 9.54 |       |
| PHZB1_PSEAE | 5 (5) | 267.98 | Phenazine biosynthesis protein PhzB 1                 | 723.94   | 1.52E+04 |      | 21.00 |
| PAL_PSEAE   | 5 (5) | 260.61 | Peptidoglycan-associated lipoprotein                  | 3542.04  | 2.09E+04 |      | 5.90  |
| AZUR_PSEAE  | 4 (3) | 257.59 | Azurin OS=Pseudomonas aeruginosa                      | 2.47E+04 | 2.61E+04 |      | 1.06  |
| PYRC_PSEAB  | 5 (4) | 251.23 | Dihydroorotase                                        | 3.32E+04 | 8389.97  | 3.96 |       |
| ETFB_PSEAE  | 3 (3) | 249.15 | Electron transfer flavoprotein subunit beta           | 6210.64  | 1903.72  | 3.26 |       |
| Y3753_PSEAE | 3 (3) | 248.08 | Uncharacterized protein PA3753                        | 5096.51  | 1.89E+04 |      | 3.71  |
| HEM2_PSEAE  | 5 (4) | 230.2  | Delta-aminolevulinic acid dehydratase                 | 4042.07  | 9080.51  |      | 2.25  |
| PGK_PSEA8   | 8 (4) | 229.71 | Phosphoglycerate kinase                               | 4417.29  | 9406.84  |      | 2.13  |
| ILVC_PSEA7  | 5 (5) | 217.23 | Ketol-acid reductoisomerase (NADP(+))                 | 3571.21  | 1.04E+04 |      | 2.91  |
| T23O_PSEAB  | 3 (3) | 217.07 | Tryptophan 2,3-dioxygenase                            | 293.74   | 3114.94  |      | 10.60 |
| PROA_PSEAB  | 4 (3) | 217.02 | Gamma-glutamyl phosphate reductase                    | 1955.91  | 7011.27  |      | 3.58  |
| ILVE_PSEAE  | 5 (5) | 213.7  | Branched-chain-amino-acid aminotransferase            | 1837.86  | 6827.27  |      | 3.71  |
| ISPF_PSEAE  | 3 (1) | 211.77 | 2-C-methyl-D-erythritol 2,4-cyclodiphosphate synthase | 409.27   | 5431.25  |      | 13.27 |
| SODF_PSEAE  | 4 (4) | 201.12 | Superoxide dismutase [Fe]                             | 1.28E+05 | 3.38E+05 |      | 2.64  |
| HFQ_PSEAB   | 5 (5) | 200.96 | RNA-binding protein Hfq                               | 1847.79  | 7761.8   |      | 4.20  |
| CISY_PSEAE  | 9 (4) | 200.13 | Citrate synthase                                      | 605.12   | 1.21E+04 |      | 20.00 |
| SPUE_PSEAE  | 5 (5) | 198.78 | Spermidine-binding periplasmic protein SpuE           | 1645.1   | 8256.11  |      | 5.02  |
| IDH_PSEAB   | 4 (2) | 198.41 | Isocitrate dehydrogenase [NADP]                       | 4648.36  | 1624.41  | 2.86 |       |
| MASZ_PSEAB  | 4 (1) | 193.94 | Malate synthase G                                     | 180.4    | 860.79   |      | 4.77  |
| PURE_PSEAE  | 3 (3) | 191.09 | N5-carboxyaminoimidazole ribonucleotide mutase        | 2587.38  | 1.38E+04 |      | 5.33  |
| DAVD_PSEAE  | 5 (3) | 182.43 | Glutarate-semialdehyde dehydrogenase DavD             | 1.70E+05 | 8.36E+04 | 2.03 |       |
| PCKA_PSEAE  | 5 (3) | 181.45 | Phosphoenolpyruvate carboxykinase (ATP)               | 2036.14  | 4633.38  |      | 2.28  |
| PHS_PSEAB   | 4 (4) | 179.58 | Putative pterin-4-alpha-carbinolamine dehydratase     | 2462.79  | 4.26E+04 |      | 17.30 |
| CYSNC_PSEAE | 4 (3) | 179.04 | Bifunctional enzyme CysN/CysC                         | 130.42   | 1690.25  |      | 12.96 |
| FABZ_PSEAB  | 4 (4) | 170.44 | 3-hydroxyacyl-[acyl-carrier-protein] dehydratase FabZ | 856.02   | 4223.85  |      | 4.93  |
| FABI_PSEAE  | 4 (2) | 169.27 | Enoyl-[acyl-carrier-protein] reductase [NADH] FabI    | 82.9     | 1734.03  |      | 20.92 |
| NOSZ_PSEAE  | 4 (3) | 165.98 | Nitrous-oxide reductase                               | 4180.25  | 2374.03  | 1.76 |       |
| TOP1_PSEAE  | 6 (5) | 164.26 | DNA topoisomerase 1                                   | 5599.09  | 1885.04  | 2.97 |       |
| ATPG_PSEAB  | 4 (1) | 161.55 | ATP synthase gamma chain                              | 397      | 3387.07  |      | 8.53  |

|             |       |        |                                                                                             |          |          |      |        |
|-------------|-------|--------|---------------------------------------------------------------------------------------------|----------|----------|------|--------|
| CHMU_PSEAE  | 3 (3) | 160.58 | Monofunctional chorismate mutase                                                            | 1621.12  | 4942.35  |      | 3.05   |
| DAVD_PSEPK  | 4 (1) | 155.83 | Glutarate-semialdehyde dehydrogenase DavD                                                   | 5.73E+04 | 4.62E+04 | 1.24 |        |
| EFTU_PSEAB  | 3 (2) | 154.92 | Elongation factor Tu                                                                        | 4963.33  | 3391.32  | 1.46 |        |
| ALKD_PSEAE  | 3 (3) | 154.76 | 2-dehydro-3-deoxy-phosphogluconate aldolase                                                 | 803.17   | 2947.19  |      | 3.70   |
| OPRI_PSEAE  | 4 (4) | 154.63 | Major outer membrane lipoprotein                                                            | 6728.66  | 4601.61  | 1.46 |        |
| FMK1_PSEAI  | 3 (3) | 154.06 | Fimbrial protein                                                                            | 1267.1   | 4194.9   |      | 3.31   |
| LGUL_PSEAE  | 3 (2) | 153.71 | Lactoylglutathione lyase                                                                    | 148.09   | 4026.71  |      | 27.19  |
| ZIPA_PSEAB  | 4 (4) | 152.21 | Cell division protein ZipA                                                                  | 1941.07  | 1.37E+04 |      | 7.06   |
| FUR_PSEAE   | 2 (2) | 150.63 | Ferric uptake regulation protein                                                            | 1252.99  | 2832.98  |      | 2.26   |
| NDK_PSEAB   | 4 (4) | 148.22 | Nucleoside diphosphate kinase                                                               | 5712.11  | 3.15E+04 |      | 5.51   |
| ODB2_PSEAE  | 3 (3) | 142.98 | Lipoamide acyltransferase component of branched-chain alpha-keto acid dehydrogenase complex | 1619.44  | 2229.45  |      | 1.38   |
| SODM_PSEAE  | 2 (2) | 140.02 | Superoxide dismutase [Mn]                                                                   | 391.45   | 4.41E+04 |      | 112.66 |
| CY551_PSEAE | 2 (2) | 134.69 | Cytochrome c-551                                                                            | 1.25E+04 | 9647.96  | 1.30 |        |
| DAVT_PSEAE  | 6 (6) | 133.76 | 5-aminovalerate aminotransferase DavT                                                       | 1.51E+04 | 1.47E+04 | 1.03 |        |
| PORD_PSEAE  | 5 (5) | 132.18 | Porin D                                                                                     | 4.80E+04 | 1.58E+04 | 3.04 |        |
| FLICB_PSEAE | 5 (2) | 130.89 | B-type flagellin                                                                            | 1.30E+04 | 1.05E+05 |      | 8.08   |
| BFR_PSEAE   | 3 (3) | 130.5  | Bacterioferritin                                                                            | 8965.38  | 3995.26  | 2.24 |        |
| MUCB_PSEAE  | 2 (2) | 127.64 | Sigma factor AlgU regulatory protein MucB                                                   | 1855.62  | 8953.2   |      | 4.82   |
| AROQ1_PSEAE | 1 (1) | 127.17 | 3-dehydroquinate dehydratase 1                                                              | 804.74   | 4969.31  |      | 6.18   |
| DNAK_PSEAB  | 6 (2) | 126.73 | Chaperone protein DnaK                                                                      | 2.19E+04 | 7141.13  | 3.07 |        |
| HPPD_PSEAE  | 2 (2) | 125.88 | 4-hydroxyphenylpyruvate dioxygenase                                                         | 398.77   | 1338.11  |      | 3.36   |
| FER1_PSEAE  | 2 (2) | 123.24 | Ferredoxin 1                                                                                | 2888.54  | 1.20E+04 |      | 4.15   |
| ACKA_PSEAE  | 4 (2) | 122.83 | Acetate kinase                                                                              | 1338.28  | 2495.67  |      | 1.86   |
| EDD_PSEAE   | 3 (2) | 122.63 | Phosphogluconate dehydratase                                                                | 592.6    | 2153.26  |      | 3.63   |
| BCCP_PSEAE  | 2 (2) | 119.46 | Biotin carboxyl carrier protein of acetyl-CoA carboxylase                                   | 3044.5   | 1.31E+04 |      | 4.30   |
| AMPA_PSEAB  | 3 (2) | 117.54 | Probable cytosol aminopeptidase                                                             | 1067.14  | 5033.73  |      | 4.71   |
| GCH12_PSEAE | 3 (2) | 113.24 | GTP cyclohydrolase 1 2                                                                      | 464.43   | 1245.87  |      | 2.68   |
| AGUA_PSEAE  | 2 (2) | 110.49 | Agmatine deiminase                                                                          | 622.91   | 2261.71  |      | 3.63   |
| ETFA_PSEAE  | 2 (2) | 106.09 | Electron transfer flavoprotein subunit alpha                                                | 3467.17  | 401.17   | 8.64 |        |

|             |       |        |                                                          |          |          |       |       |
|-------------|-------|--------|----------------------------------------------------------|----------|----------|-------|-------|
| CLPP2_PSEAE | 2 (2) | 105.1  | ATP-dependent Clp protease proteolytic subunit 2         | 2262.35  | 1539.82  | 1.47  |       |
| HEM6_PSEA7  | 3 (3) | 103.42 | Oxygen-dependent coproporphyrinogen-III oxidase          | 2282.85  | 2433.51  |       | 1.066 |
| MMSA_PSEAE  | 2 (2) | 102.9  | Methylmalonate-semialdehyde dehydrogenase [acylating]    | 1.72E+05 | 2.16E+04 | 7.96  |       |
| HSLV_PSEAB  | 1 (1) | 100.21 | ATP-dependent protease subunit HsIV                      | 2514.41  | 9459.8   |       | 3.76  |
| ACP1_PSEAE  | 2 (2) | 99.43  | Acyl carrier protein 1                                   | 4308.68  | 9679.52  |       | 2.25  |
| PSTS_PSEAB  | 4 (3) | 99     | Phosphate-binding protein PstS                           | 876.99   | 9024.94  |       | 10.29 |
| FABB_PSEAB  | 2 (2) | 94.36  | 3-oxoacyl-[acyl-carrier-protein] synthase 1              | 1862.16  | 8069.35  |       | 4.33  |
| ETFD_PSEAE  | 4 (4) | 91.86  | Electron transfer flavoprotein-ubiquinone oxidoreductase | 3478.9   | 2440.57  | 1.43  |       |
| FUMC2_PSEAE | 5 (4) | 86.67  | Fumarate hydratase class II 2                            | 1.08E+04 | 3822.43  | 2.83  |       |
| PAGL_PSEAE  | 1 (1) | 78.49  | Lipid A deacylase PagL                                   | 2232.44  | 36.21    | 61.65 |       |
| DNAK_PSEA7  | 5 (1) | 77.96  | Chaperone protein DnaK                                   | 5.45E+05 | 1.62E+05 | 3.36  |       |
| RMLC_PSEAE  | 1 (1) | 76.07  | dTDP-4-dehydrorhamnose 3,5-epimerase                     | 0        | 2736.76  |       | ∞     |
| CYSM_PSEAE  | 2 (1) | 75.21  | Cysteine synthase B                                      | 373.1    | 5489.46  |       | 14.71 |
| LDC_PSEAE   | 1 (1) | 74.59  | Murein tetrapeptide carboxypeptidase                     | 0        | 4672.8   |       | ∞     |
| SUCD_PSEAE  | 4 (3) | 73.23  | Succinate--CoA ligase [ADP-forming] subunit alpha        | 683.54   | 1742.38  |       | 2.55  |
| PANB2_PSEAB | 1 (1) | 72.63  | 3-methyl-2-oxobutanoate hydroxymethyltransferase 2       | 1752.18  | 9107.42  |       | 5.20  |
| UVRA_PSEAE  | 4 (4) | 71.27  | UvrABC system protein A                                  | 1428.4   | 1431.88  |       | 1.00  |
| DCTP_PSEAE  | 1 (1) | 68.96  | C4-dicarboxylate-binding periplasmic protein DctP        | 1157.27  | 2254.23  |       | 1.95  |
| CYCH_PSEAE  | 1 (1) | 61.52  | Cytochrome c-type biogenesis protein CycH                | 16.73    | 1320.44  |       | 78.93 |
| FMNRE_PSEAE | 1 (1) | 57.93  | NAD(P)H-dependent FMN reductase PA1204                   | 340.12   | 2925.31  |       | 8.60  |
| HIS1_PSEA8  | 1 (1) | 57.74  | ATP phosphoribosyltransferase                            | 1390.83  | 4427.97  |       | 3.18  |
| GCSH1_PSEAE | 1 (1) | 57.14  | Glycine cleavage system H protein 1                      | 1502.36  | 3778.67  |       | 2.51  |
| NUOCD_PSEAB | 1 (1) | 52.41  | NADH-quinone oxidoreductase subunit C/D                  | 835.07   | 3711.1   |       | 4.44  |
| GMHA_PSEAB  | 1 (1) | 47.44  | Phosphoheptose isomerase                                 | 3577.56  | 1.22E+04 |       | 3.41  |
| PILY1_PSEAE | 1 (1) | 46.66  | Type IV pilus biogenesis factor PilY1                    | 2841.63  | 1321.2   | 2.15  |       |
| PLPHP_PSEAE | 2 (1) | 46     | Pyridoxal phosphate homeostasis protein                  | 65.41    | 1033.07  |       | 15.79 |
| RISB_PSEAB  | 2 (2) | 39.47  | 6,7-dimethyl-8-ribityllumazine synthase                  | 775.56   | 4642.1   |       | 5.98  |
| NADE_PSEAB  | 1 (1) | 37.97  | NH(3)-dependent NAD(+) synthetase                        | 2064.82  | 6243.17  |       | 3.02  |
| TPX_PSEAE   | 1 (1) | 37.87  | Thiol peroxidase                                         | 3501.18  | 768.79   | 4.55  |       |
| AHPF_PSEAE  | 2 (1) | 37.39  | Alkyl hydroperoxide reductase subunit F                  | 87.03    | 2110.56  |       | 24.25 |



|             |       |       |                                       |         |         |      |      |
|-------------|-------|-------|---------------------------------------|---------|---------|------|------|
| HGD_PSEAE   | 1 (1) | 36.11 | Homogentisate 1,2-dioxygenase         | 371.9   | 2289.1  |      | 6.15 |
| GCH1L_PSEAE | 1 (1) | 33.98 | GTP cyclohydrolase 1 type 2 homolog   | 752.81  | 4290.5  |      | 5.70 |
| GCSH2_PSEAE | 1 (1) | 33.6  | Glycine cleavage system H protein 2   | 1286.84 | 1214.81 | 1.06 |      |
| PPIA_PSEAE  | 1 (1) | 30.93 | Peptidyl-prolyl cis-trans isomerase A | 5343.06 | 7055.94 |      | 1.32 |

**Supplementary Table S4. Cell-free secretome of *P. aeruginosa* CF isolate 6 following growth under normoxia and anoxia.** Data represents the average normalised abundances and fold increase from  $N=1$ . A fold change of 1.0 is indicative of no change between normoxia and anoxia. I6A = *P. aeruginosa* CF isolate 6 grown under anoxia. I6O = *P. aeruginosa* CF isolate 6 grown under normoxia.

| Accession  | Peptides (unique) | Score   | Description                               | Average Normalised Abundances |          | Fold increase |      |
|------------|-------------------|---------|-------------------------------------------|-------------------------------|----------|---------------|------|
|            |                   |         |                                           | I6A                           | I6O      | I6A           | I6O  |
| NIRS_PSEAE | 46 (41)           | 3926.07 | Nitrite reductase                         | 3.51E+05                      | 3.95E+05 |               | 1.13 |
| DNAK_PSEAB | 41 (7)            | 3051.93 | Chaperone protein DnaK                    | 9.38E+04                      | 8.92E+04 | 1.05          |      |
| CLPB_PSEAE | 44 (21)           | 2778.56 | Chaperone protein ClpB                    | 2.42E+04                      | 2.30E+04 | 1.05          |      |
| EFG1_PSEAE | 48 (12)           | 2717.96 | Elongation factor G 1                     | 9.14E+04                      | 1.16E+05 |               | 1.27 |
| DHE2_PSEAE | 42 (30)           | 2091.59 | NAD-specific glutamate dehydrogenase      | 4.15E+04                      | 1.63E+04 | 2.55          |      |
| NOSZ_PSEAE | 32 (15)           | 1982.41 | Nitrous-oxide reductase                   | 1.13E+05                      | 1.34E+05 |               | 1.19 |
| Y421_PSEAB | 22 (6)            | 1977.61 | UPF0312 protein PLES_04211                | 8.32E+04                      | 5.48E+04 | 1.52          |      |
| ACNB_PSEAE | 31 (23)           | 1839.54 | Aconitate hydratase B                     | 8.79E+04                      | 2.45E+04 | 3.59          |      |
| RPOB_PSEAB | 40 (8)            | 1820.31 | DNA-directed RNA polymerase subunit beta  | 1.63E+04                      | 8852.14  | 1.84          |      |
| IDH_PSEAB  | 27 (19)           | 1646.45 | Isocitrate dehydrogenase [NADP]           | 8.57E+04                      | 7.81E+04 | 1.10          |      |
| HTPG_PSEAE | 27 (6)            | 1634.94 | Chaperone protein HtpG                    | 2.83E+04                      | 4.37E+04 |               | 1.54 |
| RPOC_PSEAB | 33 (7)            | 1554.88 | DNA-directed RNA polymerase subunit beta' | 1.26E+04                      | 9488.99  | 1.33          |      |
| PNP_PSEAB  | 26 (8)            | 1465.56 | Polyribonucleotide nucleotidyltransferase | 1.79E+04                      | 1.30E+04 | 1.38          |      |
| HPPD_PSEAE | 21 (17)           | 1463.22 | 4-hydroxyphenylpyruvate dioxygenase       | 1.75E+04                      | 1.06E+05 |               | 6.06 |
| DAVT_PSEAE | 21 (12)           | 1455.1  | 5-aminovalerate aminotransferase DavT     | 9.07E+04                      | 1.17E+05 |               | 1.29 |
| DAVD_PSEAE | 24 (16)           | 1448.46 | Glutarate-semialdehyde dehydrogenase DavD | 5.34E+04                      | 5.17E+04 | 1.03          |      |

|             |         |         |                                                                         |          |          |      |      |
|-------------|---------|---------|-------------------------------------------------------------------------|----------|----------|------|------|
| FLICA_PSEAI | 18 (16) | 1445.7  | A-type flagellin                                                        | 4.50E+04 | 3.21E+04 | 1.40 |      |
| DLDH1_PSEAE | 24 (18) | 1346.67 | Dihydrolipoyl dehydrogenase                                             | 2.52E+04 | 6.22E+04 |      | 2.47 |
| EFTS_PSEAB  | 20 (8)  | 1318.89 | Elongation factor Ts                                                    | 3.90E+04 | 4.58E+04 |      | 1.17 |
| CATA_PSEAE  | 22 (17) | 1293.81 | Catalase                                                                | 5.87E+04 | 8.90E+04 |      | 1.52 |
| EFTU_PSEAB  | 20 (5)  | 1274.31 | Elongation factor Tu                                                    | 9.26E+04 | 7.84E+04 | 1.18 |      |
| ACNA_PSEAE  | 23 (16) | 1244.52 | Aconitate hydratase A                                                   | 5.14E+04 | 3.15E+04 | 1.63 |      |
| CH60_PSEA7  | 25 (2)  | 1228.89 | 60 kDa chaperonin                                                       | 7185.77  | 2535.63  | 2.83 |      |
| Y3922_PSEAE | 21 (17) | 1223.59 | Uncharacterized protein PA3922                                          | 4.95E+04 | 5.87E+04 |      | 1.19 |
| DSBA_PSEAB  | 16 (15) | 1191.11 | Thiol:disulfide interchange protein DsbA                                | 1.15E+05 | 7.89E+04 | 1.46 |      |
| RRF_PSEAB   | 16 (14) | 1130.73 | Ribosome-recycling factor                                               | 4.83E+04 | 8.35E+04 |      | 1.73 |
| ATPB_PSEAB  | 20 (6)  | 1116.71 | ATP synthase subunit beta                                               | 2744.58  | 3756.19  |      | 1.37 |
| SYL_PSEAB   | 19 (10) | 1100.15 | Leucine--tRNA ligase                                                    | 8177.06  | 9805.77  |      | 1.20 |
| FADB_PSEAB  | 23 (9)  | 1092.52 | Fatty acid oxidation complex subunit alpha                              | 1.71E+04 | 1.29E+04 | 1.33 |      |
| ATPA_PSEAB  | 18 (2)  | 1091.07 | ATP synthase subunit alpha                                              | 1.71E+04 | 2.33E+04 |      | 1.36 |
| EFG2_PSEAE  | 19 (2)  | 1084.94 | Elongation factor G 2                                                   | 1197.54  | 2236.07  |      | 1.87 |
| MASZ_PSEAB  | 18 (8)  | 1065.06 | Malate synthase G                                                       | 2.95E+04 | 4.66E+04 |      | 1.58 |
| FABY_PSEAE  | 16 (14) | 1064.02 | Beta-ketoacyl-[acyl-carrier-protein] synthase FabY                      | 1.05E+04 | 2.25E+04 |      | 2.14 |
| ETFA_PSEAE  | 12 (11) | 1050.27 | Electron transfer flavoprotein subunit alpha                            | 1.60E+05 | 1.59E+05 | 1.01 |      |
| BRAC_PSEAE  | 14 (7)  | 1029.12 | Leucine-, isoleucine-, valine-, threonine-, and alanine-binding protein | 1.36E+05 | 1.03E+05 | 1.32 |      |
| RS1_PSEAE   | 22 (20) | 1017.46 | 30S ribosomal protein S1                                                | 5.66E+04 | 8.43E+04 |      | 1.49 |
| DCTP_PSEAE  | 19 (15) | 1016.64 | C4-dicarboxylate-binding periplasmic protein DctP                       | 8.38E+04 | 5.87E+04 | 1.43 |      |
| SYI_PSEAB   | 20 (2)  | 989.18  | Isoleucine--tRNA ligase                                                 | 2802     | 4436.1   |      | 1.58 |
| ARCA_PSEAE  | 15 (8)  | 988     | Arginine deiminase                                                      | 2.44E+04 | 2.49E+04 |      | 1.02 |
| ETFB_PSEAE  | 13 (8)  | 986.43  | Electron transfer flavoprotein subunit beta                             | 1.32E+05 | 1.80E+05 |      | 1.36 |
| PPSA_PSEAB  | 19 (14) | 969.97  | Phosphoenolpyruvate synthase                                            | 3.27E+04 | 2.14E+04 | 1.53 |      |
| PHHC_PSEAE  | 17 (13) | 921.36  | Aromatic-amino-acid aminotransferase                                    | 2.83E+04 | 3.11E+04 |      | 1.10 |
| SYP_PSEAE   | 15 (4)  | 857.67  | Proline--tRNA ligase                                                    | 1.38E+04 | 2.26E+04 |      | 1.64 |
| RL1_PSEA7   | 14 (8)  | 849.1   | 50S ribosomal protein L1                                                | 1.02E+04 | 2.00E+04 |      | 1.96 |
| GCSP1_PSEAE | 17 (5)  | 845.26  | Glycine dehydrogenase (decarboxylating) 1                               | 2.27E+04 | 5827.6   | 3.90 |      |

|             |         |        |                                                                                                    |          |          |      |      |
|-------------|---------|--------|----------------------------------------------------------------------------------------------------|----------|----------|------|------|
| ACSA1_PSEAE | 19 (10) | 841.09 | Acetyl-coenzyme A synthetase 1                                                                     | 1.16E+04 | 1.08E+04 | 1.07 |      |
| METK_PSEAB  | 15 (7)  | 840.53 | S-adenosylmethionine synthase                                                                      | 2.48E+04 | 1.83E+04 | 1.36 |      |
| SAHH_PSEAB  | 17 (8)  | 836.44 | Adenosylhomocysteinase                                                                             | 3.64E+04 | 4.30E+04 |      | 1.18 |
| SPUD_PSEAB  | 16 (13) | 834.85 | Putrescine-binding periplasmic protein SpuD                                                        | 7.03E+04 | 8.35E+04 |      | 1.19 |
| METE_PSEAB  | 17 (9)  | 832.01 | 5-methyltetrahydropteroyltriglutamate--homocysteine methyltransferase                              | 1.38E+04 | 2.87E+04 |      | 2.08 |
| ATOB_PSEAE  | 18 (16) | 824.87 | Acetyl-CoA acetyltransferase                                                                       | 2.73E+04 | 6.03E+04 |      | 2.21 |
| ASPQ_PSEAE  | 15 (6)  | 803.62 | Glutaminase-asparaginase                                                                           | 2.94E+04 | 4.86E+04 |      | 1.65 |
| SYV_PSEAE   | 18 (7)  | 797.74 | Valine--tRNA ligase                                                                                | 2.57E+04 | 2.16E+04 | 1.19 |      |
| ODP1_PSEAE  | 18 (16) | 791.89 | Pyruvate dehydrogenase E1 component                                                                | 1.95E+04 | 1.65E+04 | 1.18 |      |
| NUOG_PSEAE  | 18 (10) | 766.43 | NADH-quinone oxidoreductase subunit G                                                              | 8138.43  | 8287.99  |      | 1.02 |
| FLID1_PSEAI | 15 (10) | 762.33 | A-type flagellar hook-associated protein 2                                                         | 2.19E+04 | 2.94E+04 |      | 1.34 |
| ODO2_PSEAE  | 12 (10) | 757.77 | Dihydropolypyllysine-residue succinyltransferase component of 2-oxoglutarate dehydrogenase complex | 1.74E+04 | 5837.01  | 2.98 |      |
| ISCS_PSEAB  | 12 (2)  | 753.02 | Cysteine desulfurase IscS                                                                          | 6077.91  | 1.33E+04 |      | 2.19 |
| TIG_PSEAB   | 16 (2)  | 750.85 | Trigger factor                                                                                     | 2855.81  | 8453.05  |      | 2.96 |
| GYRA_PSEAE  | 14 (7)  | 736.16 | DNA gyrase subunit A                                                                               | 8775.53  | 8120.61  | 1.08 |      |
| SYL_PSEAE   | 13 (1)  | 734.3  | Leucine--tRNA ligase                                                                               | 5234.86  | 5110.83  | 1.02 |      |
| LOLA_PSEAB  | 13 (11) | 731.34 | Outer-membrane lipoprotein carrier protein                                                         | 2.79E+04 | 1.99E+04 | 1.40 |      |
| TAL_PSEA8   | 13 (2)  | 720.4  | Transaldolase                                                                                      | 1.40E+04 | 1.54E+04 |      | 1.10 |
| ACCA_PSEAB  | 12 (11) | 717.91 | Acetyl-coenzyme A carboxylase carboxyl transferase subunit alpha                                   | 1.49E+04 | 1.27E+04 | 1.17 |      |
| PORF_PSEAE  | 11 (11) | 712.74 | Outer membrane porin F                                                                             | 4.26E+04 | 5.25E+04 |      | 1.23 |
| RPOA_PSEAB  | 14 (8)  | 712.69 | DNA-directed RNA polymerase subunit alpha                                                          | 1.07E+04 | 2.02E+04 |      | 1.89 |
| SUCC_PSEAB  | 16 (2)  | 699.96 | Succinate--CoA ligase [ADP-forming] subunit beta                                                   | 3453.08  | 2460.04  | 1.40 |      |
| FABG_PSEAE  | 13 (11) | 699.68 | 3-oxoacyl-[acyl-carrier-protein] reductase FabG                                                    | 2.55E+04 | 6.41E+04 |      | 2.51 |
| ARNB_PSEAB  | 10 (8)  | 688.59 | UDP-4-amino-4-deoxy-L-arabinose--oxoglutarate aminotransferase                                     | 2.46E+04 | 2.48E+04 |      | 1.01 |
| PCKA_PSEAE  | 14 (11) | 685.84 | Phosphoenolpyruvate carboxykinase (ATP)                                                            | 1.80E+04 | 2.79E+04 |      | 1.55 |
| P5217_PSEAE | 11 (9)  | 676.19 | Probable binding protein component of ABC iron transporter PA5217                                  | 1.57E+04 | 1.80E+04 |      | 1.15 |
| CISY_PSEAE  | 16 (9)  | 666    | Citrate synthase                                                                                   | 1.48E+04 | 1.76E+04 |      | 1.19 |
| SUCD_PSEAE  | 12 (9)  | 614.81 | Succinate--CoA ligase [ADP-forming] subunit alpha                                                  | 1.17E+05 | 1.19E+05 |      | 1.02 |
| DPO3B_PSEAE | 7 (6)   | 614.31 | Beta sliding clamp                                                                                 | 1.36E+04 | 2.48E+04 |      | 1.82 |

|             |         |        |                                                                                             |          |          |      |         |
|-------------|---------|--------|---------------------------------------------------------------------------------------------|----------|----------|------|---------|
| RL6_PSEAE7  | 10 (8)  | 609.49 | 50S ribosomal protein L6                                                                    | 1.60E+04 | 5.88E+04 |      | 3.68    |
| GREAE_PSEAE | 7 (5)   | 594.26 | Transcription elongation factor GreA                                                        | 2.44E+04 | 2.39E+04 | 1.02 |         |
| ODB2_PSEAE  | 10 (7)  | 591.02 | Lipoamide acyltransferase component of branched-chain alpha-keto acid dehydrogenase complex | 1.24E+04 | 2953.23  | 4.20 |         |
| THIO_PSEAE  | 12 (7)  | 580.45 | Thioredoxin                                                                                 | 6.02E+04 | 4.65E+04 | 1.29 |         |
| IF2_PSEAE7  | 13 (2)  | 573.08 | Translation initiation factor IF-2                                                          | 4970.51  | 4140.37  | 1.20 |         |
| SPEE2_PSEAE | 7 (3)   | 563.64 | Polyamine aminopropyltransferase 2                                                          | 3.71E+04 | 1.77E+04 | 2.10 |         |
| GLN1B_PSEAE | 10 (6)  | 561.1  | Glutamine synthetase                                                                        | 2.40E+04 | 3.17E+04 |      | 1.32    |
| DAPA_PSEAE  | 8 (3)   | 557.93 | 4-hydroxy-tetrahydrodipicolinate synthase                                                   | 1.07E+04 | 8716.06  | 1.23 |         |
| FUR_PSEAE   | 6 (6)   | 553.28 | Ferric uptake regulation protein                                                            | 3.32E+04 | 5.76E+04 |      | 1.73    |
| PYRG_PSEAB  | 9 (4)   | 552.34 | CTP synthase                                                                                | 6358.18  | 3235.86  | 1.96 |         |
| IF3_PSEAE   | 8 (4)   | 550.92 | Translation initiation factor IF-3                                                          | 1.84E+04 | 2.73E+04 |      | 1.48    |
| AHPC_PSEAB  | 12 (10) | 548.27 | Alkyl hydroperoxide reductase C                                                             | 1.28E+05 | 2.97E+05 |      | 2.32    |
| TAL_PSEAB   | 11 (1)  | 541.47 | Transaldolase                                                                               | 4563.31  | 5645.1   |      | 1.24    |
| SYR_PSEAE7  | 11 (4)  | 528.15 | Arginine-tRNA ligase                                                                        | 3778.01  | 2597.07  | 1.45 |         |
| ETFD_PSEAE  | 11 (10) | 524.29 | Electron transfer flavoprotein-ubiquinone oxidoreductase                                    | 4939.44  | 1.19E+04 |      | 2.41    |
| GRPE_PSEAB  | 7 (7)   | 523.42 | Protein GrpE                                                                                | 1.48E+04 | 1.56E+04 |      | 1.05    |
| PYS2_PSEAE  | 13 (9)  | 522.34 | Pyocin-S2                                                                                   | 1.55E+04 | 5645.46  | 2.75 |         |
| ILVD_PSEAB  | 9 (1)   | 512.24 | Dihydroxy-acid dehydratase                                                                  | 3514.03  | 5302.22  |      | 1.51    |
| KPRS_PSEAE  | 7 (7)   | 507.9  | Ribose-phosphate pyrophosphokinase                                                          | 8631.07  | 1.01E+04 |      | 1.17    |
| ATPB_ALCBS  | 8 (1)   | 500.39 | ATP synthase subunit beta                                                                   | 0.79     | 2219.1   |      | 2808.99 |
| OTCC_PSEAE  | 11 (4)  | 498.67 | Ornithine carbamoyltransferase, catabolic                                                   | 3.80E+04 | 1.10E+04 | 3.45 |         |
| MMSA_PSEAE  | 7 (6)   | 493.68 | Methylmalonate-semialdehyde dehydrogenase [acylating]                                       | 1.89E+04 | 1.68E+04 | 1.13 |         |
| ODP2_PSEAE  | 10 (6)  | 492.21 | Dihydrolipoyllysine-residue acetyltransferase component of pyruvate dehydrogenase complex   | 1.45E+04 | 4023.28  | 3.60 |         |
| DAPB_PSEAB  | 10 (6)  | 491.77 | 4-hydroxy-tetrahydrodipicolinate reductase                                                  | 1.26E+04 | 1.30E+04 |      | 1.03    |
| NADE_PSEAB  | 9 (7)   | 491.04 | NH(3)-dependent NAD(+) synthetase                                                           | 1.68E+04 | 1.84E+04 |      | 1.10    |
| OPGG_PSEAB  | 7 (5)   | 484.91 | Glucans biosynthesis protein G                                                              | 1.26E+04 | 1.40E+04 |      | 1.11    |
| SECB_PSEAB  | 7 (7)   | 472.61 | Protein-export protein SecB                                                                 | 2.00E+04 | 2.46E+04 |      | 1.23    |
| HIS1_PSEAB  | 9 (2)   | 467.42 | ATP phosphoribosyltransferase                                                               | 2745.18  | 4464.05  |      | 1.63    |
| AMPA_PSEAB  | 8 (2)   | 466.2  | Probable cytosol aminopeptidase                                                             | 5179.35  | 5350.63  |      | 1.03    |
| RECA_PSEAB  | 9 (3)   | 462.09 | Protein RecA                                                                                | 1.72E+04 | 7089.29  | 2.43 |         |

|             |         |        |                                                                 |          |          |      |      |
|-------------|---------|--------|-----------------------------------------------------------------|----------|----------|------|------|
| DPO1_PSEAE  | 11 (7)  | 452.27 | DNA polymerase I                                                | 5463.46  | 5618.92  |      | 1.03 |
| ACCC_PSEAE  | 11 (10) | 450.88 | Biotin carboxylase                                              | 2.15E+04 | 1.75E+04 | 1.23 |      |
| ECOT_PSEAB  | 8 (4)   | 449.08 | Ecotin                                                          | 4.46E+04 | 2.03E+04 | 2.20 |      |
| GGT_PSEAE   | 8 (5)   | 435.04 | Gamma-glutamyltranspeptidase                                    | 1.13E+04 | 1.17E+04 |      | 1.04 |
| HUTU_PSEAB  | 10 (1)  | 434.15 | Urocanate hydratase                                             | 2071.58  | 1383.37  | 1.50 |      |
| AZUR_PSEAE  | 5 (3)   | 434.1  | Azurin                                                          | 3.99E+05 | 2.97E+05 | 1.34 |      |
| CH10_PSEA7  | 8 (5)   | 431.92 | 10 kDa chaperonin                                               | 9.20E+04 | 8.63E+04 | 1.07 |      |
| KAD_PSEAB   | 8 (1)   | 431.41 | Adenylate kinase                                                | 2863.62  | 1876.68  | 1.53 |      |
| GSHB_PSEAE  | 11 (8)  | 428.33 | Glutathione synthetase                                          | 7320.31  | 6010.22  | 1.22 |      |
| TPX_PSEAE   | 8 (6)   | 424.99 | Thiol peroxidase                                                | 5.82E+04 | 8.25E+04 |      | 1.42 |
| ARUC_PSEAE  | 12 (11) | 421.57 | Succinylornithine transaminase/acetylornithine aminotransferase | 1.23E+04 | 1.86E+04 |      | 1.51 |
| Y1579_PSEAE | 9 (8)   | 417.56 | Uncharacterized protein PA1579                                  | 4.41E+04 | 2.16E+04 | 2.04 |      |
| MMSB_PSEAE  | 10 (8)  | 417.47 | 3-hydroxyisobutyrate dehydrogenase                              | 5.47E+04 | 3.66E+04 | 1.49 |      |
| DBHB_PSEAE  | 6 (3)   | 413.62 | DNA-binding protein HU-beta                                     | 9.10E+04 | 4.70E+04 | 1.94 |      |
| RL9_PSEA7   | 7 (5)   | 413.31 | 50S ribosomal protein L9                                        | 2.54E+04 | 4.99E+04 |      | 1.96 |
| NUSG_PSEAE  | 8 (5)   | 413.07 | Transcription termination/antitermination protein NusG          | 4583     | 1.01E+04 |      | 2.20 |
| RL5_PSEA8   | 7 (1)   | 411.52 | 50S ribosomal protein L5                                        | 1.33E+04 | 2.31E+04 |      | 1.74 |
| RL25_PSEA8  | 8 (2)   | 406.94 | 50S ribosomal protein L25                                       | 1.23E+04 | 6979.58  | 1.76 |      |
| PGK_PSEAB   | 7 (3)   | 400.45 | Phosphoglycerate kinase                                         | 4847.58  | 6179.27  |      | 1.27 |
| TAL_PSEA7   | 9 (1)   | 399.28 | Transaldolase                                                   | 1797.22  | 2130.44  |      | 1.19 |
| RS8_PSEA7   | 5 (5)   | 398.36 | 30S ribosomal protein S8                                        | 2.10E+04 | 2.06E+04 | 1.02 |      |
| AAT_PSEAE   | 7 (5)   | 393.37 | Aspartate aminotransferase                                      | 5623.48  | 5546.68  | 1.01 |      |
| SURA_PSEAE  | 8 (6)   | 388.75 | Chaperone SurA                                                  | 8547.91  | 1.34E+04 |      | 1.57 |
| RL7_PSEA7   | 9 (9)   | 388.04 | 50S ribosomal protein L7/L12                                    | 1.97E+04 | 2069.11  | 9.52 |      |
| HEM6_PSEA8  | 9 (7)   | 387.92 | Oxygen-dependent coproporphyrinogen-III oxidase                 | 5.49E+04 | 2.94E+04 | 1.87 |      |
| PH4H_PSEAE  | 8 (7)   | 383.57 | Phenylalanine-4-hydroxylase                                     | 1.62E+04 | 2.89E+04 |      | 1.78 |
| NDK_PSEAB   | 7 (6)   | 377.96 | Nucleoside diphosphate kinase                                   | 8.48E+04 | 1.51E+05 |      | 1.78 |
| IPYR_PSEAE  | 6 (5)   | 372.96 | Inorganic pyrophosphatase                                       | 1.98E+04 | 3.63E+04 |      | 1.83 |
| ACCD_PSEAB  | 6 (2)   | 372.67 | Acetyl-coenzyme A carboxylase carboxyl transferase subunit beta | 9875.83  | 9872.35  | 1.00 |      |
| RPOC_WIGBR  | 11 (1)  | 371.29 | DNA-directed RNA polymerase subunit beta'                       | 0        | 451.79   |      | ∞    |

|             |        |        |                                                             |          |          |      |      |
|-------------|--------|--------|-------------------------------------------------------------|----------|----------|------|------|
| SYK_PSEAE   | 7 (2)  | 369.73 | Lysine--tRNA ligase                                         | 2952.4   | 4870.33  |      | 1.65 |
| SKPL_PSEAE  | 4 (3)  | 362.98 | Skp-like protein                                            | 1.94E+04 | 1.72E+04 | 1.13 |      |
| RS6_PSEA7   | 5 (4)  | 361.9  | 30S ribosomal protein S6                                    | 1.01E+04 | 1.41E+04 |      | 1.40 |
| PURA_PSEAB  | 5 (2)  | 359.93 | Adenylosuccinate synthetase                                 | 8507.77  | 1.36E+04 |      | 1.60 |
| SODF_PSEAE  | 7 (6)  | 359.09 | Superoxide dismutase [Fe]                                   | 8.44E+04 | 1.32E+05 |      | 1.56 |
| SUCC_PSEAE  | 10 (2) | 351.04 | Succinate--CoA ligase [ADP-forming] subunit beta            | 5882.18  | 2523.52  | 2.33 |      |
| PHS_PSEAB   | 6 (6)  | 349.57 | Putative pterin-4-alpha-carbinolamine dehydratase           | 9.66E+04 | 9.33E+04 | 1.04 |      |
| ARCC_PSEAE  | 5 (3)  | 349.52 | Carbamate kinase                                            | 1.22E+04 | 6624.67  | 1.84 |      |
| SSB_PSEAE   | 7 (7)  | 346.74 | Single-stranded DNA-binding protein                         | 3.43E+04 | 5.30E+04 |      | 1.55 |
| HEM2_PSEAE  | 6 (4)  | 343.44 | Delta-aminolevulinic acid dehydratase                       | 5092.04  | 6972.84  |      | 1.37 |
| NIRQ_PSEAE  | 7 (7)  | 340.65 | Denitrification regulatory protein NirQ                     | 1.53E+04 | 3616.07  | 4.23 |      |
| FADA_PSEAB  | 5 (4)  | 339.96 | 3-ketoacyl-CoA thiolase                                     | 6239.5   | 5428.93  | 1.15 |      |
| STHA_PSEAB  | 7 (6)  | 335.15 | Soluble pyridine nucleotide transhydrogenase                | 4272.6   | 6423.06  |      | 1.50 |
| CLPP1_PSEAE | 6 (5)  | 334.95 | ATP-dependent Clp protease proteolytic subunit 1            | 1.83E+04 | 1.13E+04 | 1.62 |      |
| SYGA_PSEAB  | 5 (5)  | 333.22 | Glycine--tRNA ligase alpha subunit                          | 4696.47  | 5627.9   | 0.83 | 1.20 |
| PPIA_PSEAE  | 6 (5)  | 331.2  | Peptidyl-prolyl cis-trans isomerase A                       | 2.19E+04 | 1.35E+04 | 1.62 |      |
| CYNS_PSEAE  | 7 (2)  | 330.23 | Cyanate hydratase                                           | 7693.32  | 1.60E+04 |      | 2.08 |
| RL25_PSEA7  | 7 (2)  | 329.59 | 50S ribosomal protein L25                                   | 5.74E+04 | 8080.55  | 7.10 |      |
| NFUA_PSEAB  | 6 (5)  | 328.6  | Fe/S biogenesis protein NfuA                                | 1.12E+04 | 1.04E+04 | 1.08 |      |
| SYW_PSEAE   | 5 (4)  | 326.71 | Tryptophan--tRNA ligase                                     | 4303.23  | 7981.1   |      | 1.85 |
| EDD_PSEAE   | 7 (5)  | 325.84 | Phosphogluconate dehydratase                                | 1.03E+04 | 1.42E+04 |      | 1.38 |
| DHOM_PSEAE  | 5 (4)  | 320.51 | Homoserine dehydrogenase                                    | 3282.37  | 5097.24  |      | 1.55 |
| AK_PSEAE    | 10 (4) | 319.6  | Aspartokinase                                               | 1.77E+04 | 1.92E+04 |      | 1.08 |
| PYRE_PSEAB  | 5 (1)  | 313.66 | Orotate phosphoribosyltransferase                           | 1.68E+04 | 2.49E+04 |      | 1.48 |
| CARB_PSEAE  | 7 (3)  | 310.67 | Carbamoyl-phosphate synthase large chain                    | 4451.2   | 1415.82  | 3.14 |      |
| GPMI_PSEAE  | 5 (1)  | 309.41 | 2,3-bisphosphoglycerate-independent phosphoglycerate mutase | 3846.13  | 5155.66  |      | 1.34 |
| HSCA_PSEA8  | 8 (5)  | 309.34 | Chaperone protein HscA homolog                              | 3357.62  | 6098.37  |      | 1.82 |
| SYT_PSEAB   | 8 (2)  | 301.28 | Threonine--tRNA ligase                                      | 1986.78  | 2137.08  |      | 1.08 |

|             |        |        |                                                                     |          |          |      |      |
|-------------|--------|--------|---------------------------------------------------------------------|----------|----------|------|------|
| LIUE_PSEAE  | 6 (4)  | 298.31 | 3-hydroxy-3-isohexenylglutaryl-CoA/hydroxy-methylglutaryl-CoA lyase | 5797.97  | 5138.89  | 1.13 |      |
| GLMS_PSEAE  | 6 (5)  | 295.78 | Glutamine--fructose-6-phosphate aminotransferase [isomerizing]      | 2732.86  | 3696.9   |      | 1.35 |
| GAP2_PSEAB  | 12 (7) | 295.31 | Glyceraldehyde-3-phosphate dehydrogenase-like protein               | 3.17E+04 | 3.70E+04 |      | 1.17 |
| ARGJ_PSEAE  | 5 (5)  | 294.91 | Arginine biosynthesis bifunctional protein ArgJ                     | 8066.95  | 7029.44  | 1.15 |      |
| AMPC_PSEAE  | 6 (5)  | 290.82 | Beta-lactamase                                                      | 1.07E+04 | 3359.88  | 3.18 |      |
| GPMI_PSEAB  | 5 (1)  | 288.27 | 2,3-bisphosphoglycerate-independent phosphoglycerate mutase         | 2096.44  | 3298.42  |      | 1.57 |
| PAL_PSEAE   | 6 (5)  | 288.11 | Peptidoglycan-associated lipoprotein                                | 1.49E+04 | 2007.79  | 7.42 |      |
| RL3_PSEA7   | 7 (4)  | 287.29 | 50S ribosomal protein L3                                            | 1.19E+04 | 1.54E+04 |      | 1.29 |
| PDXH_PSEA8  | 9 (7)  | 282.32 | Pyridoxine/pyridoxamine 5'-phosphate oxidase                        | 1.03E+04 | 9836.74  | 1.05 |      |
| ILVC_PSEAB  | 7 (5)  | 281.28 | Ketol-acid reductoisomerase (NADP(+))                               | 6495.11  | 2831.48  | 2.29 |      |
| EFP_PSEAB   | 5 (4)  | 278.31 | Elongation factor P                                                 | 2.09E+04 | 1.52E+04 | 1.38 |      |
| GSHR_PSEAE  | 5 (4)  | 277.37 | Glutathione reductase                                               | 7148.56  | 5108.21  | 1.40 |      |
| SPUE_PSEAE  | 8 (5)  | 271.33 | Spermidine-binding periplasmic protein SpuE                         | 1.78E+04 | 1.70E+04 | 1.05 |      |
| SY2_PSEAE   | 6 (1)  | 271.25 | Tyrosine--tRNA ligase 2                                             | 1467.32  | 3952.98  |      | 2.69 |
| ARNA_PSEA7  | 6 (1)  | 269.02 | Bifunctional polymyxin resistance protein ArnA                      | 2659.5   | 374.08   | 7.11 |      |
| THIG_PSEAB  | 6 (6)  | 267.8  | Thiazole synthase                                                   | 9070.97  | 8488.37  | 1.07 |      |
| HEMTB_PSEAB | 5 (3)  | 266.79 | Bacteriohemerythrin                                                 | 5734.71  | 2.11E+04 |      | 3.68 |
| EST_PSEAE   | 4 (4)  | 266.04 | Esterase TesA                                                       | 6449.51  | 3168.14  | 2.04 |      |
| ACKA_PSEA7  | 6 (5)  | 263.69 | Acetate kinase                                                      | 4934.95  | 7203.99  |      | 1.46 |
| ENO_PSEAB   | 5 (2)  | 259.9  | Enolase                                                             | 3856.19  | 3095.77  | 1.25 |      |
| PANB2_PSEAB | 6 (6)  | 259.18 | 3-methyl-2-oxobutanoate hydroxymethyltransferase 2                  | 1.26E+04 | 8243.72  | 1.53 |      |
| Y4395_PSEAE | 6 (3)  | 254.32 | UPF0234 protein PA4395                                              | 9633.76  | 6039.82  | 1.60 |      |
| FABA_PSEAB  | 5 (4)  | 251.54 | 3-hydroxydecanoyl-[acyl-carrier-protein] dehydratase                | 1.41E+04 | 3.07E+04 |      | 2.18 |
| FABB_PSEAB  | 4 (4)  | 251.23 | 3-oxoacyl-[acyl-carrier-protein] synthase 1                         | 1.40E+04 | 3.00E+04 |      | 2.14 |
| RS7_PSEA7   | 6 (1)  | 246.72 | 30S ribosomal protein S7                                            | 7041.66  | 4160.74  | 1.69 |      |
| ISPF_PSEAE  | 3 (1)  | 245.98 | 2-C-methyl-D-erythritol 2,4-cyclodiphosphate synthase               | 8084.96  | 9846.36  |      | 1.22 |
| DAPD_PSEAE  | 6 (2)  | 245.64 | 2,3,4,5-tetrahydropyridine-2,6-dicarboxylate N-succinyltransferase  | 4575.19  | 3907.22  | 1.17 |      |
| RL11_PSEA7  | 3 (1)  | 244.82 | 50S ribosomal protein L11                                           | 1.43E+04 | 2.16E+04 |      | 1.51 |
| P5CR_PSEAE  | 5 (5)  | 241.96 | Proline-5-carboxylate reductase                                     | 6272.59  | 7823.96  |      | 1.25 |
| Y329_PSEAE  | 4 (4)  | 237.64 | UPF0339 protein PA0329                                              | 1.39E+04 | 1.14E+04 | 1.22 |      |

|             |       |        |                                                            |          |          |       |      |
|-------------|-------|--------|------------------------------------------------------------|----------|----------|-------|------|
| PURE_PSEAE  | 4 (3) | 237.38 | N5-carboxyaminoimidazole ribonucleotide mutase             | 4163.8   | 4709.89  |       | 1.13 |
| RL18_PSEAE  | 3 (1) | 237.2  | 50S ribosomal protein L18                                  | 7362.17  | 4736.09  | 1.55  |      |
| TRPC_PSEAE  | 4 (2) | 237.15 | Indole-3-glycerol phosphate synthase                       | 2528.71  | 5527.89  |       | 2.19 |
| GUAA_PSEAB  | 4 (3) | 237.07 | GMP synthase [glutamine-hydrolyzing]                       | 1.69E+04 | 1.90E+04 |       | 1.12 |
| PUR7_PSEA8  | 5 (3) | 236.9  | Phosphoribosylaminoimidazole-succinocarboxamide synthase   | 7905.56  | 5686.18  | 1.39  |      |
| RRAAH_PSEAB | 5 (3) | 236.5  | Putative 4-hydroxy-4-methyl-2-oxoglutarate aldolase        | 1.82E+04 | 3.17E+04 |       | 1.74 |
| ACEA_PSEAE  | 6 (5) | 236.48 | Isocitrate lyase                                           | 6225.4   | 2142.21  | 2.91  |      |
| BAUC_PSEAE  | 6 (5) | 236.29 | Putative 3-oxopropanoate dehydrogenase                     | 1.20E+04 | 4565.74  | 2.63  |      |
| PYRE_PSEA7  | 5 (1) | 235.39 | Orotate phosphoribosyltransferase                          | 1489.23  | 1342.12  | 1.11  |      |
| G3P_PSEAE   | 4 (3) | 233.25 | Glyceraldehyde-3-phosphate dehydrogenase                   | 9565.61  | 4021.94  | 2.38  |      |
| ASPA_PSEAE  | 9 (6) | 229.08 | Aspartate ammonia-lyase                                    | 6780.96  | 1.01E+04 |       | 1.49 |
| DEF_PSEAE   | 4 (4) | 229.04 | Peptide deformylase                                        | 4196.66  | 5942.49  |       | 1.42 |
| FMNRE_PSEAE | 5 (5) | 227.89 | NAD(P)H-dependent FMN reductase PA1204                     | 2.54E+05 | 1.19E+04 | 21.34 |      |
| QOR_PSEAE   | 4 (3) | 227.66 | Quinone oxidoreductase                                     | 2502.61  | 761.04   | 3.29  |      |
| LEU1_PSEAE  | 6 (5) | 225.99 | 2-isopropylmalate synthase                                 | 4360.91  | 1613.55  | 2.70  |      |
| CYC4_PSEAE  | 5 (2) | 225.63 | Cytochrome c4                                              | 5180.75  | 2444.33  | 2.12  |      |
| FADB_PSESM  | 6 (1) | 224.77 | Fatty acid oxidation complex subunit alpha                 | 2.11E+04 | 1.50E+04 | 1.41  |      |
| GATB_PSEA7  | 4 (3) | 222.43 | Aspartyl/glutamyl-tRNA(Asn/Gln) amidotransferase subunit B | 3395.07  | 5646.2   |       | 1.66 |
| RS7_PSE14   | 6 (1) | 221.91 | 30S ribosomal protein S7                                   | 1.48E+04 | 1.20E+04 | 1.23  |      |
| MUCB_PSEAE  | 4 (4) | 220.75 | Sigma factor AlgU regulatory protein MucB                  | 7846.6   | 3739.36  | 2.10  |      |
| PSTS_PSEAB  | 4 (4) | 220.27 | Phosphate-binding protein PstS                             | 1.27E+04 | 9833.48  | 1.29  |      |
| UPP_PSEAB   | 6 (1) | 218.9  | Uracil phosphoribosyltransferase                           | 3.28E+04 | 5.93E+04 |       | 1.81 |
| ELAS_PSEAB  | 4 (3) | 217.95 | Elastase                                                   | 3.67E+04 | 2.04E+04 | 1.80  |      |
| NUOB_PSEAB  | 5 (3) | 216.74 | NADH-quinone oxidoreductase subunit B                      | 1849.28  | 2993.59  |       | 1.62 |
| ODBB_PSEAE  | 6 (4) | 216.63 | 2-oxoisovalerate dehydrogenase subunit beta                | 7444.49  | 5097.76  | 1.46  |      |
| HCHA_PSEAB  | 5 (4) | 213.8  | Protein deglycase HchA                                     | 6000.01  | 1894.32  | 3.17  |      |
| FABZ_PSEAB  | 5 (4) | 213.8  | 3-hydroxyacyl-[acyl-carrier-protein] dehydratase FabZ      | 5298.18  | 7111.24  |       | 1.34 |
| RISB_PSEAB  | 5 (5) | 212.32 | 6,7-dimethyl-8-ribityllumazine synthase                    | 1.14E+04 | 6465.79  | 1.76  |      |
| SYFA_PSEA8  | 6 (2) | 209.71 | Phenylalanine--tRNA ligase alpha subunit                   | 741.59   | 2288.72  |       | 3.09 |
| HCP1_PSEAE  | 6 (3) | 209.57 | Protein hcp1                                               | 4483.28  | 1.80E+04 |       | 4.01 |



|             |        |        |                                                               |          |          |        |      |
|-------------|--------|--------|---------------------------------------------------------------|----------|----------|--------|------|
| UBIE_PSEAB  | 3 (3)  | 208.05 | Ubiquinone/menaquinone biosynthesis C-methyltransferase UbiE  | 4990.16  | 6069.48  |        | 1.22 |
| AMIE_PSEAE  | 4 (3)  | 204.49 | Aliphatic amidase                                             | 3276.9   | 1.10E+04 |        | 3.36 |
| MTIP_PSEAE  | 4 (4)  | 202.16 | S-methyl-5'-thioinosine phosphorylase                         | 2934.62  | 2914.36  | 1.01   |      |
| GMHA_PSEAB  | 3 (3)  | 198.53 | Phosphoheptose isomerase                                      | 9468.14  | 1.34E+04 |        | 1.42 |
| PYRR_PSEAB  | 5 (5)  | 198.07 | Bifunctional protein PyrR                                     | 1.23E+04 | 1.16E+04 | 1.06   |      |
| CYSM_PSEAE  | 6 (5)  | 196.84 | Cysteine synthase B                                           | 1.58E+04 | 9042.08  | 1.75   |      |
| GATA_PSEA7  | 4 (2)  | 195.39 | Glutamyl-tRNA(Gln) amidotransferase subunit A                 | 668.87   | 1368.24  |        | 2.05 |
| ACP1_PSEAE  | 2 (1)  | 195.3  | Acyl carrier protein 1                                        | 1.20E+05 | 1.57E+05 |        | 1.31 |
| SYQ_PSEAB   | 5 (2)  | 195.27 | Glutamine--tRNA ligase                                        | 2.20E+04 | 1.86E+04 | 1.18   |      |
| SYFB_PSEAE  | 7 (4)  | 195.22 | Phenylalanine--tRNA ligase beta subunit                       | 2682.02  | 2891.91  |        | 1.08 |
| PROA_PSEAB  | 4 (3)  | 194.45 | Gamma-glutamyl phosphate reductase                            | 2142.72  | 3763.24  |        | 1.76 |
| DHAS_PSEAE  | 4 (2)  | 193.89 | Aspartate-semialdehyde dehydrogenase                          | 3.29E+04 | 3.23E+04 | 1.02   |      |
| PILH_PSEAE  | 3 (2)  | 191.49 | Protein PilH                                                  | 5006.9   | 1495.94  | 3.35   |      |
| RL24_PSEA7  | 6 (6)  | 190.81 | 50S ribosomal protein L24                                     | 9267.1   | 1.07E+04 |        | 1.15 |
| LAP_PSEAB   | 4 (2)  | 190.72 | Aminopeptidase                                                | 5339.96  | 2941.41  | 1.82   |      |
| MSRA_PSEAE  | 4 (2)  | 187.52 | Peptide methionine sulfoxide reductase MsrA                   | 8414.31  | 9049.94  |        | 1.08 |
| ILVE_PSEAE  | 4 (4)  | 184.41 | Branched-chain-amino-acid aminotransferase                    | 2.31E+04 | 2.41E+04 |        | 1.04 |
| METZ_PSEAE  | 5 (3)  | 184.21 | O-succinylhomoserine sulfhydrylase                            | 1785.12  | 1633.36  | 1.09   |      |
| CYSNC_PSEAE | 4 (2)  | 183.61 | Bifunctional enzyme CysN/CysC                                 | 2004.09  | 2296.45  |        | 1.15 |
| NUOCD_PSEAB | 4 (4)  | 180.99 | NADH-quinone oxidoreductase subunit C/D                       | 1672.19  | 2335.19  |        | 1.40 |
| RL19_PSEA7  | 4 (2)  | 179.15 | 50S ribosomal protein L19                                     | 6710.12  | 5009.57  | 1.34   |      |
| PURT_PSEAB  | 3 (1)  | 177.56 | Formate-dependent phosphoribosylglycinamide formyltransferase | 2420.16  | 4065.35  |        | 1.68 |
| ALGP_PSEAE  | 3 (3)  | 176.77 | Transcriptional regulatory protein AlgP                       | 2561.65  | 3771.97  |        | 1.47 |
| RPOB_ACIF2  | 14 (3) | 175.57 | DNA-directed RNA polymerase subunit beta                      | 336.96   | 465.49   |        | 1.38 |
| LPXC_PSEAB  | 4 (3)  | 171.36 | UDP-3-O-acyl-N-acetylglucosamine deacetylase                  | 2956.82  | 3405.28  |        | 1.15 |
| DBHA_PSEAE  | 2 (1)  | 170.93 | DNA-binding protein HU-alpha                                  | 2163.61  | 21.12    | 102.44 |      |
| GCSH1_PSEAE | 3 (3)  | 170.92 | Glycine cleavage system H protein 1                           | 1.56E+04 | 4848.33  | 3.22   |      |
| Y3435_PSEAE | 3 (3)  | 170.67 | Uncharacterized protein PA3435                                | 5499.06  | 3277.42  | 1.68   |      |
| COAD_PSEAB  | 3 (3)  | 169.13 | Phosphopantetheine adenylyltransferase                        | 3910.38  | 6638.45  |        | 1.70 |
| Y4465_PSEAE | 3 (2)  | 169.09 | Nucleotide-binding protein PA4465                             | 4179.44  | 1581.58  | 2.64   |      |

|             |       |        |                                                   |          |          |       |      |
|-------------|-------|--------|---------------------------------------------------|----------|----------|-------|------|
| ARGC_PSEA7  | 4 (1) | 164.45 | N-acetyl-gamma-glutamyl-phosphate reductase       | 1617.33  | 2608.91  |       | 1.61 |
| THRC_PSEAE  | 4 (2) | 162.56 | Threonine synthase                                | 1060.54  | 1815.48  |       | 1.71 |
| PHEA_PSEAE  | 3 (2) | 161.97 | P-protein                                         | 1290.74  | 1856.03  |       | 1.44 |
| CCPR_PSEAE  | 3 (3) | 160.03 | Cytochrome c551 peroxidase                        | 9513.92  | 119.03   | 79.93 |      |
| MOAC_PSEAB  | 3 (2) | 158.94 | Cyclic pyranopterin monophosphate synthase        | 4504.06  | 9865.4   |       | 2.19 |
| ATPG_PSEAB  | 6 (3) | 158.77 | ATP synthase gamma chain                          | 843.34   | 874.22   |       | 1.04 |
| HFQ_PSEAB   | 4 (4) | 158.44 | RNA-binding protein Hfq                           | 7851.92  | 2684.42  | 2.92  |      |
| OTCA_PSEAE  | 4 (3) | 156.56 | Ornithine carbamoyltransferase, anabolic          | 1982.71  | 1820.23  | 1.09  |      |
| CHMU_PSEAE  | 3 (2) | 155.43 | Monofunctional chorismate mutase                  | 3840.37  | 3053.91  | 1.26  |      |
| LEU3_PSEAE  | 4 (3) | 154.78 | 3-isopropylmalate dehydrogenase                   | 2541.32  | 3327.12  |       | 1.31 |
| THTR_PSEAE  | 2 (2) | 154.59 | Thiosulfate sulfurtransferase                     | 2669.62  | 991.96   | 2.69  |      |
| GLPK2_PSEAE | 4 (4) | 153.63 | Glycerol kinase 2                                 | 4077     | 7616.46  |       | 1.87 |
| FUMC1_PSEAE | 6 (3) | 153.23 | Fumarate hydratase class II 1                     | 4550.69  | 4839.75  |       | 1.06 |
| KDSB_PSEAB  | 2 (2) | 150.73 | 3-deoxy-manno-octulosonate cytidyltransferase     | 1601.76  | 2047.4   |       | 1.28 |
| ATPE_PSEAB  | 3 (3) | 149.51 | ATP synthase epsilon chain                        | 9457.96  | 4492.74  | 2.11  |      |
| GSA_PSEAB   | 5 (2) | 146.66 | Glutamate-1-semialdehyde 2,1-aminomutase          | 927.94   | 3276.91  |       | 3.53 |
| PORD_PSEAE  | 4 (4) | 145.95 | Porin D                                           | 2415.09  | 543.61   | 4.44  |      |
| ATPD_PSEAB  | 3 (2) | 145.65 | ATP synthase subunit delta                        | 4974.3   | 1.35E+04 |       | 2.71 |
| ODBA_PSEAE  | 4 (3) | 144.44 | 2-oxoisovalerate dehydrogenase subunit alpha      | 3143.38  | 3458.41  |       | 1.10 |
| RHO_PSEAE   | 6 (3) | 141.08 | Transcription termination factor Rho              | 1617.37  | 4537.28  |       | 2.81 |
| PYRC_PSEAB  | 2 (2) | 139.87 | Dihydroorotase                                    | 2996.93  | 7169.31  |       | 2.39 |
| Y2116_PSEAE | 3 (2) | 139.34 | Putative hydro-lyase PA2116                       | 7664.13  | 1.23E+04 |       | 1.60 |
| PDXY_PSEAB  | 3 (2) | 138.19 | Pyridoxal kinase PdxY                             | 3146.08  | 1591.48  | 1.98  |      |
| MAO1_PSEA7  | 4 (1) | 137.79 | NAD-dependent malic enzyme                        | 3824.81  | 4443.71  |       | 1.16 |
| SYA_PSEAB   | 6 (5) | 136.16 | Alanine--tRNA ligase                              | 2.66E+04 | 1.59E+04 | 1.67  |      |
| BETB_PSEAB  | 2 (1) | 133.52 | NAD/NADP-dependent betaine aldehyde dehydrogenase | 4023.32  | 3156.7   | 1.27  |      |
| Y1607_PSEA8 | 3 (3) | 132.03 | UPF0502 protein PLES_16071                        | 1366.85  | 4447.1   |       | 3.25 |
| SECA_PSEAB  | 6 (2) | 131.11 | Protein translocase subunit SecA                  | 1733.4   | 80.47    | 21.54 |      |
| CY551_PSEAE | 2 (2) | 130.87 | Cytochrome c-551                                  | 1.23E+04 | 9199.89  | 1.34  |      |
| GLO2_PSEA8  | 2 (2) | 130.16 | Hydroxyacylglutathione hydrolase                  | 8582.73  | 6250     | 1.37  |      |

|             |       |        |                                                           |          |          |       |      |
|-------------|-------|--------|-----------------------------------------------------------|----------|----------|-------|------|
| SYM_PSEAB   | 4 (3) | 129.46 | Methionine--tRNA ligase                                   | 1522.1   | 445.05   | 3.42  |      |
| BFR_PSEAE   | 4 (4) | 126.55 | Bacterioferritin                                          | 2184.01  | 5793.98  |       | 2.65 |
| KDSA_PSEAB  | 3 (1) | 126.17 | 2-dehydro-3-deoxyphosphooctonate aldolase                 | 1089.39  | 1241.66  |       | 1.14 |
| HISX_PSEAE  | 3 (2) | 124.92 | Histidinol dehydrogenase                                  | 2.33E+04 | 1.50E+04 | 1.55  |      |
| FLIA_PSEAE  | 3 (2) | 124.8  | RNA polymerase sigma factor FliA                          | 4558.44  | 3870.55  | 1.18  |      |
| PLPHP_PSEAE | 2 (2) | 123.99 | Pyridoxal phosphate homeostasis protein                   | 1939.13  | 3242.86  |       | 1.67 |
| TOLB_PSEAE  | 3 (2) | 122.19 | Protein TolB                                              | 2172.9   | 6111.5   |       | 2.81 |
| BCCP_PSEAE  | 2 (2) | 121.86 | Biotin carboxyl carrier protein of acetyl-CoA carboxylase | 2.11E+04 | 4.52E+04 |       | 2.14 |
| Y4473_PSEAE | 2 (1) | 121.22 | UPF0307 protein PA4473                                    | 856.95   | 1330.09  |       | 1.55 |
| Y3753_PSEAE | 2 (2) | 120    | Uncharacterized protein PA3753                            | 1.37E+04 | 1.34E+04 | 1.02  |      |
| MINE_PSEAB  | 3 (2) | 118.49 | Cell division topological specificity factor              | 2279.78  | 356.39   | 6.40  |      |
| RS2_PSEA7   | 2 (2) | 116.29 | 30S ribosomal protein S2                                  | 5951.92  | 1241.66  | 4.79  |      |
| MURA_PSEAB  | 4 (1) | 114.72 | UDP-N-acetylglucosamine 1-carboxyvinyltransferase         | 292.76   | 820.74   |       | 2.80 |
| SUHB_PSEAE  | 3 (1) | 114.24 | Inositol-1-monophosphatase                                | 7154.75  | 1.08E+04 |       | 1.51 |
| GCH12_PSEAE | 3 (3) | 113.28 | GTP cyclohydrolase 1 2                                    | 2126.22  | 3912.12  |       | 1.84 |
| RPIA_PSEAB  | 3 (2) | 113.17 | Ribose-5-phosphate isomerase A                            | 2252.37  | 1008.16  | 2.23  |      |
| PUR8_PSEAE  | 4 (2) | 113.15 | Adenylosuccinate lyase                                    | 2760.35  | 1949.21  | 1.42  |      |
| ACSA2_PSEAE | 3 (2) | 112.99 | Acetyl-coenzyme A synthetase 2                            | 3769     | 3483.85  | 1.08  |      |
| PTSN_PSEAE  | 4 (3) | 112.24 | Nitrogen regulatory protein                               | 1.07E+04 | 1.61E+04 |       | 1.50 |
| SYA_PSEA7   | 5 (3) | 108.06 | Alanine--tRNA ligase                                      | 1.01E+04 | 4.34E+04 |       | 4.30 |
| PUR4_PSEAE  | 7 (3) | 107.81 | Phosphoribosylformylglycinamide synthase                  | 5129.72  | 628.29   | 8.16  |      |
| SYE_PSEAB   | 3 (2) | 106.79 | Glutamate--tRNA ligase                                    | 2238.59  | 2441.28  |       | 1.09 |
| RL16_PSEA7  | 3 (3) | 104.57 | 50S ribosomal protein L16                                 | 1141.09  | 316.73   | 3.60  |      |
| TPIS_PSEAB  | 2 (1) | 104.52 | Triosephosphate isomerase                                 | 2177.28  | 2146.85  | 1.01  |      |
| PYRB_PSEAB  | 3 (1) | 104.49 | Aspartate carbamoyltransferase                            | 1983.82  | 598      | 3.32  |      |
| RL22_PSEA7  | 3 (3) | 104.02 | 50S ribosomal protein L22                                 | 5443.61  | 7067.85  |       | 1.30 |
| PUR2_PSEAE  | 2 (2) | 100.91 | Phosphoribosylamine--glycine ligase                       | 445.13   | 1491.72  |       | 3.35 |
| RL21_PSEA7  | 3 (3) | 100.06 | 50S ribosomal protein L21                                 | 3922.25  | 4801.24  |       | 1.22 |
| RL20_PSEA7  | 2 (1) | 99.59  | 50S ribosomal protein L20                                 | 6143.02  | 1631.31  | 3.77  |      |
| LIP_PSEAE   | 1 (1) | 98.65  | Triacylglycerol lipase                                    | 4142.15  | 61.6     | 67.24 |      |

|             |       |       |                                                                                                   |          |         |      |        |
|-------------|-------|-------|---------------------------------------------------------------------------------------------------|----------|---------|------|--------|
| DDL_B_PSEAE | 1 (1) | 97.69 | D-alanine--D-alanine ligase B                                                                     | 799.87   | 152.98  | 5.23 |        |
| ANR_PSEAE   | 2 (2) | 96.85 | Transcriptional activator protein anr                                                             | 1268.28  | 2774.62 |      | 2.19   |
| PQSD_PSEAE  | 2 (2) | 96.67 | Anthraniloyl-CoA anthraniloyltransferase                                                          | 1695.56  | 3175.86 |      | 1.87   |
| SODM_PSEAE  | 2 (2) | 95.28 | Superoxide dismutase [Mn]                                                                         | 951.74   | 3602.31 |      | 3.78   |
| 6PGL_PSEPU  | 3 (1) | 94.83 | 6-phosphogluconolactonase                                                                         | 2688.29  | 4048.74 |      | 1.51   |
| SYGB_PSEAB  | 2 (2) | 94.59 | Glycine--tRNA ligase beta subunit                                                                 | 3692.65  | 3246.07 | 1.14 |        |
| NUOE_PSEAE  | 1 (1) | 94.25 | NADH-quinone oxidoreductase subunit E                                                             | 3057.7   | 6175.55 |      | 2.02   |
| MURD_PSEAE  | 4 (4) | 94.07 | UDP-N-acetylmuramoylalanine--D-glutamate ligase                                                   | 1376.49  | 1368.5  | 1.01 |        |
| HIS4_PSEA7  | 2 (2) | 92.91 | 1-(5-phosphoribosyl)-5-[(5-phosphoribosylamino)methylideneamino]imidazole-4-carboxamide isomerase | 4454.88  | 3962.15 | 1.12 |        |
| Y1618_PSEAE | 2 (2) | 92.64 | Putative esterase PA1618                                                                          | 706.97   | 1600.3  |      | 2.26   |
| HGD_PSEAE   | 2 (1) | 91.6  | Homogentisate 1,2-dioxygenase                                                                     | 14.89    | 1750.94 |      | 117.59 |
| CLPP2_PSEAE | 1 (1) | 91.09 | ATP-dependent Clp protease proteolytic subunit 2                                                  | 1288     | 461.16  | 2.79 |        |
| HISZ_PSEAB  | 2 (2) | 90.98 | ATP phosphoribosyltransferase regulatory subunit                                                  | 6461.65  | 8702.23 |      | 1.35   |
| TRPG_PSEAE  | 1 (1) | 90.81 | Anthranilate synthase component 2                                                                 | 5036.24  | 4987.34 | 1.01 |        |
| COAE_PSEAE  | 2 (2) | 90.69 | Dephospho-CoA kinase                                                                              | 932.39   | 841.31  | 1.11 |        |
| RSMH_PSEA8  | 3 (2) | 90.06 | Ribosomal RNA small subunit methyltransferase H                                                   | 4412.18  | 5657.03 |      | 1.28   |
| DCDA_PSEAE  | 1 (1) | 89.02 | Diaminopimelate decarboxylase                                                                     | 872.86   | 1047    |      | 1.20   |
| FMCD_PSEAI  | 1 (1) | 87.87 | Fimbrial protein                                                                                  | 1.12E+04 | 6779.89 | 1.65 |        |
| AROB_PSEAB  | 3 (1) | 87.54 | 3-dehydroquinate synthase                                                                         | 2764.32  | 3210.57 |      | 1.16   |
| PANC_PSEAB  | 2 (2) | 87.32 | Pantothenate synthetase                                                                           | 5200.57  | 6638.23 |      | 1.28   |
| MURE_PSEAE  | 2 (2) | 87.18 | UDP-N-acetylmuramoyl-L-alanyl-D-glutamate--2,6-diaminopimelate ligase                             | 217.63   | 342.22  |      | 1.57   |
| HGD_PSEAB   | 3 (2) | 85.02 | Homogentisate 1,2-dioxygenase                                                                     | 451.95   | 7365.51 |      | 16.30  |
| PYRX_PSEAE  | 4 (2) | 83.95 | Dihydroorotase-like protein                                                                       | 4099.27  | 958.31  | 4.28 |        |
| ASTB_PSEAB  | 2 (2) | 83.54 | N-succinylarginine dihydrolase                                                                    | 3250.66  | 3438.95 |      | 1.06   |
| ACND_SHEON  | 1 (1) | 82.65 | 2-methylcitrate dehydratase (2-methyl-trans-aconitate forming)                                    | 3432.91  | 1313.62 | 2.61 |        |
| APT_PSEAB   | 3 (2) | 81.68 | Adenine phosphoribosyltransferase                                                                 | 1798.76  | 2291.71 |      | 1.27   |
| HEMN_PSEAE  | 2 (1) | 81.66 | Oxygen-independent coproporphyrinogen III oxidase                                                 | 1003.36  | 149.27  | 6.72 |        |
| LDC_PSEAE   | 1 (1) | 81.62 | Murein tetrapeptide carboxypeptidase                                                              | 1529.81  | 739.13  | 2.07 |        |
| RS9_PSEA7   | 2 (2) | 81.53 | 30S ribosomal protein S9                                                                          | 2186.93  | 855.72  | 2.56 |        |

|             |       |       |                                                   |          |          |        |      |
|-------------|-------|-------|---------------------------------------------------|----------|----------|--------|------|
| EUTC_PSEAB  | 1 (1) | 80.25 | Ethanolamine ammonia-lyase light chain            | 88.47    | 572.84   |        | 6.47 |
| DADA1_PSEAE | 3 (2) | 79.06 | D-amino acid dehydrogenase 1                      | 7919.32  | 2585.74  | 3.06   |      |
| PPK_PSEAE   | 3 (3) | 78.82 | Polyphosphate kinase                              | 556.29   | 501.25   | 1.11   |      |
| CAPP_PSEAE  | 2 (1) | 78.55 | Phosphoenolpyruvate carboxylase                   | 1.23E+04 | 1.44E+04 |        | 1.17 |
| AROQ1_PSEAE | 1 (1) | 78.33 | 3-dehydroquininate dehydratase 1                  | 1.71E+04 | 1.10E+04 | 1.55   |      |
| RS14_PSEA7  | 1 (1) | 78.3  | 30S ribosomal protein S14                         | 548.56   | 0        | ∞      |      |
| SYS_PSEAB   | 2 (2) | 77.57 | Serine--tRNA ligase                               | 2794.55  | 4354.81  |        | 1.56 |
| DCD_PSEAB   | 2 (2) | 77.37 | dCTP deaminase                                    | 6970.86  | 1.13E+04 |        | 1.62 |
| PUR1_PSEAE  | 1 (1) | 76.93 | Amidophosphoribosyltransferase                    | 2573.08  | 3.05     | 843.63 |      |
| TRPA_PSEAB  | 1 (1) | 76.56 | Tryptophan synthase alpha chain                   | 8095.02  | 1.21E+04 |        | 1.49 |
| ESTA_PSEAE  | 1 (1) | 74.32 | Esterase EstA                                     | 881.8    | 304.85   | 2.89   |      |
| KDSA1_PSEPK | 4 (2) | 74.23 | 2-dehydro-3-deoxyphosphooctonate aldolase 1       | 1.77E+04 | 1.93E+04 |        | 1.09 |
| HSLV_PSEAB  | 1 (1) | 74.14 | ATP-dependent protease subunit HsIV               | 1.35E+04 | 1.19E+04 | 1.13   |      |
| LGUL_PSEAE  | 2 (2) | 74.13 | Lactoylglutathione lyase                          | 1757.47  | 609.92   | 2.88   |      |
| GPDA_PSEAB  | 2 (2) | 73.58 | Glycerol-3-phosphate dehydrogenase [NAD(P)+]      | 731.81   | 1386.62  |        | 1.89 |
| RS20_PSEA7  | 1 (1) | 71.66 | 30S ribosomal protein S20                         | 1.25E+04 | 9441.53  | 1.32   |      |
| FER_PSEAE   | 1 (1) | 71.52 | 2Fe-2S ferredoxin                                 | 881.16   | 3066.23  |        | 3.48 |
| TRPB_PSEAE  | 2 (2) | 70.41 | Tryptophan synthase beta chain                    | 1.72E+04 | 5240.46  | 3.28   |      |
| OADC_PSEAB  | 3 (2) | 70.24 | Oxaloacetate decarboxylase                        | 1032.02  | 972.05   | 1.06   |      |
| HLDD_PSEAB  | 1 (1) | 70.08 | ADP-L-glycero-D-manno-heptose-6-epimerase         | 1734.4   | 203.33   | 8.53   |      |
| ERPA_PSEAB  | 1 (1) | 70.02 | Iron-sulfur cluster insertion protein ErpA        | 9462.38  | 8165.97  | 1.16   |      |
| BEKAS_PSEAE | 3 (1) | 69.15 | Beta-ketodecanoyl-[acyl-carrier-protein] synthase | 2712.18  | 4620.2   |        | 1.70 |
| OPRI_PSEAE  | 1 (1) | 68.66 | Major outer membrane lipoprotein                  | 368.13   | 324.99   | 1.13   |      |
| UVRB_PSEAE  | 2 (1) | 68.08 | UvrABC system protein B                           | 0        | 386.56   |        | ∞    |
| FOLD_PSEAB  | 1 (1) | 67.79 | Bifunctional protein FoID                         | 4932.86  | 4630.81  | 1.07   |      |
| DSBG_PSEAE  | 1 (1) | 67.3  | Thiol:disulfide interchange protein DsbG          | 2232     | 3266.29  | 0.68   | 1.46 |
| SURE_PSEAB  | 1 (1) | 66.3  | 5'-nucleotidase SurE                              | 2824.26  | 2613.95  | 1.08   |      |
| NUOF_PSEAE  | 1 (1) | 65.2  | NADH-quinone oxidoreductase subunit F             | 2039.46  | 287.3    | 7.10   |      |
| NORC_PSEAE  | 2 (2) | 65.14 | Nitric oxide reductase subunit C                  | 4825.12  | 133.58   | 36.12  |      |
| F16PA_PSEA7 | 1 (1) | 64.82 | Fructose-1,6-bisphosphatase class 1               | 2045.23  | 4179.58  |        | 2.04 |

|             |       |       |                                                  |          |          |      |      |
|-------------|-------|-------|--------------------------------------------------|----------|----------|------|------|
| DNAJ_PSEAB  | 2 (1) | 63.85 | Chaperone protein DnaJ                           | 4216.5   | 3326.05  | 1.27 |      |
| HUTI_PSEAB  | 2 (2) | 63.21 | Imidazolonepropionase                            | 1773.85  | 629.57   | 2.82 |      |
| T23O_PSEAB  | 1 (1) | 62.33 | Tryptophan 2,3-dioxygenase                       | 1744.13  | 1319.65  | 1.32 |      |
| COBN_PSEAE  | 3 (2) | 61.19 | Aerobic cobaltochelate subunit CobN              | 743.38   | 669.21   | 1.11 |      |
| AGUA_PSEAB  | 1 (1) | 61.08 | Agmatine deiminase                               | 3462.83  | 3340.99  | 1.04 |      |
| PRTN_PSEAE  | 2 (2) | 60.87 | Transcription regulatory protein PrtN            | 4.04E+04 | 4.49E+04 |      | 1.11 |
| BAUA_PSEAE  | 2 (1) | 60.7  | Beta-alanine--pyruvate aminotransferase          | 6036.88  | 4824.03  | 1.25 |      |
| HIS7_PSEA7  | 2 (1) | 60.31 | Imidazoleglycerol-phosphate dehydratase          | 1449.94  | 175.09   | 8.28 |      |
| MTND_PSEAB  | 1 (1) | 59.33 | Acireductone dioxygenase                         | 4197.37  | 1304.43  | 3.22 |      |
| ASTD_PSEAE  | 1 (1) | 58.06 | N-succinylglutamate 5-semialdehyde dehydrogenase | 2189.27  | 724.68   | 3.02 |      |
| RS17_PSEA7  | 1 (1) | 56.64 | 30S ribosomal protein S17                        | 2694.45  | 1313.2   | 2.05 |      |
| Y2077_PSEAB | 1 (1) | 56.51 | STAS-domain containing protein PA14_20770        | 1481     | 303.15   | 4.89 |      |
| GLMU_PSEAB  | 2 (2) | 55.44 | Bifunctional protein GlmU                        | 2778.68  | 1273.58  | 2.18 |      |
| GALU_PSEAE  | 2 (1) | 54.72 | UTP--glucose-1-phosphate uridylyltransferase     | 479.76   | 520.09   |      | 1.08 |
| G6PI_PSEA7  | 3 (1) | 54.61 | Glucose-6-phosphate isomerase                    | 1812.76  | 1469.3   | 1.23 |      |
| PHEC_PSEAE  | 1 (1) | 53.92 | Cyclohexadienyl dehydratase                      | 2652.87  | 676.01   | 3.92 |      |
| YGFB_PSEAE  | 1 (1) | 53.24 | UPF0149 protein PA5225                           | 2497.78  | 362.97   | 6.88 |      |
| HIS3_PSEA7  | 1 (1) | 52.3  | Phosphoribosyl-AMP cyclohydrolase                | 6338.31  | 785.18   | 8.07 |      |
| Y3332_PSEAE | 1 (1) | 50.99 | Uncharacterized PhzA/B-like protein PA3332       | 1542.84  | 1574.66  |      | 1.02 |
| CSY3_PSEAB  | 1 (1) | 49.73 | CRISPR-associated protein Csy3                   | 2949.66  | 2751.96  | 1.07 |      |
| Y2972_PSEAE | 1 (1) | 48.35 | Maf-like protein PA2972                          | 377.27   | 303.83   | 1.24 |      |
| ARNA_PSEAB  | 2 (1) | 47.18 | Bifunctional polymyxin resistance protein ArnA   | 7389.39  | 5375.54  | 1.37 |      |
| Y978_PSEA8  | 1 (1) | 46.79 | UPF0250 protein PLES_09781                       | 1799.46  | 541.38   | 3.32 |      |
| FLIN_PSEAE  | 1 (1) | 46.57 | Flagellar motor switch protein FlIN              | 2785.12  | 1607.54  | 1.73 |      |
| RS3_PSEA7   | 2 (2) | 44.87 | 30S ribosomal protein S3                         | 2222.98  | 2327.11  |      | 1.05 |
| ALKD_PSEAE  | 1 (1) | 44.72 | 2-dehydro-3-deoxy-phosphogluconate aldolase      | 619.82   | 518.61   | 1.20 |      |
| GCH11_PSEAE | 1 (1) | 44.4  | GTP cyclohydrolase 1 1                           | 2509.17  | 3171.8   |      | 1.26 |
| CYC5_PSEME  | 1 (1) | 44.17 | Cytochrome c5                                    | 6877.14  | 5184.34  | 1.33 |      |
| CAS6_PSEAB  | 1 (1) | 44.1  | CRISPR-associated endonuclease Cas6/Csy4         | 587.99   | 827.33   |      | 1.41 |
| RL32_PSEA7  | 1 (1) | 42.75 | 50S ribosomal protein L32                        | 6330.02  | 1420.99  | 4.45 |      |

|             |       |       |                                                                |         |         |       |        |
|-------------|-------|-------|----------------------------------------------------------------|---------|---------|-------|--------|
| TIG_PSEA6   | 3 (2) | 41.73 | Trigger factor                                                 | 2472.36 | 2232.45 | 1.11  |        |
| NADC_PSEAE  | 1 (1) | 41.27 | Nicotinate-nucleotide pyrophosphorylase [carboxylating]        | 793.29  | 20.13   | 39.41 |        |
| ARNB_PSEAE  | 3 (3) | 40.8  | UDP-4-amino-4-deoxy-L-arabinose--oxoglutarate aminotransferase | 6876.78 | 2084.46 | 3.30  |        |
| RS19_PSE14  | 1 (1) | 39.03 | 30S ribosomal protein S19                                      | 1911.82 | 456.18  | 4.19  |        |
| HIS81_PSEAE | 2 (1) | 38.56 | Histidinol-phosphate aminotransferase 1                        | 1210.71 | 14.87   | 81.42 |        |
| ASTE_PSEAB  | 2 (1) | 38.41 | Succinylglutamate desuccinylase                                | 0       | 1063.02 |       | ∞      |
| RLUC_PSEAE  | 1 (1) | 37.41 | Ribosomal large subunit pseudouridine synthase C               | 1860.74 | 1200.18 | 1.55  |        |
| OBG_PSEAB   | 2 (1) | 37.07 | GTPase Obg                                                     | 11.43   | 2899.72 |       | 253.69 |
| PGK_PSEA8   | 2 (1) | 36.95 | Phosphoglycerate kinase                                        | 40.9    | 705.77  |       | 17.26  |
| FETP_PSEAB  | 1 (1) | 35.88 | Probable Fe(2+)-trafficking protein                            | 2763.53 | 344.38  | 8.02  |        |
| YID1_PSEAE  | 3 (3) | 35.86 | Uncharacterized protein PA5481                                 | 4845.02 | 2014.49 | 2.41  |        |
| ACKA_PSEAB  | 2 (2) | 31.32 | Acetate kinase                                                 | 49.76   | 338.7   |       | 6.81   |

**Supplementary Table S5. Cell-free secretome of *P. aeruginosa* CF isolate 7 following growth under normoxia and anoxia.** Data represents the average normalised abundances and fold increase from  $N=1$ . A fold change of 1.0 is indicative of no change between normoxia and anoxia.. I7A = *P. aeruginosa* CF isolate 7 grown under anoxia. I7O = *P. aeruginosa* CF isolate 7 grown under normoxia.

| Accession   | Peptides (unique) | Score   | Description                                                             | Average Normalised Abundances |          | Fold change |      |
|-------------|-------------------|---------|-------------------------------------------------------------------------|-------------------------------|----------|-------------|------|
|             |                   |         |                                                                         | I7O                           | I7A      | I7O         | I7A  |
| FLICA_PSEAI | 37 (33)           | 3589.39 | A-type flagellin                                                        | 4.63E+06                      | 6.96E+06 |             | 1.50 |
| IMPA_PSEAE  | 49 (48)           | 3562.38 | Immunomodulating metalloprotease                                        | 6.07E+05                      | 2.73E+06 |             | 4.50 |
| ELAS_PSEAE  | 29 (28)           | 3120.58 | Elastase                                                                | 4.59E+06                      | 3.21E+06 | 1.43        |      |
| BRAC_PSEAE  | 25 (23)           | 2328.65 | Leucine-, isoleucine-, valine-, threonine-, and alanine-binding protein | 1.66E+06                      | 8.05E+05 | 2.06        |      |
| Y807_PSEAB  | 26 (25)           | 2170.15 | Putative prophage major tail sheath protein                             | 8.64E+05                      | 3.44E+06 |             | 3.98 |
| LAP_PSEAB   | 25 (25)           | 1954.53 | Aminopeptidase                                                          | 2.89E+06                      | 4.30E+06 |             | 1.49 |
| ATPB_PSEAB  | 22 (22)           | 1807.3  | ATP synthase subunit beta                                               | 2.91E+05                      | 3.82E+05 |             | 1.31 |
| NIRS_PSEAE  | 26 (26)           | 1725.26 | Nitrite reductase                                                       | 2.54E+05                      | 4.25E+05 |             | 1.67 |

|             |         |         |                                                                   |          |          |      |      |
|-------------|---------|---------|-------------------------------------------------------------------|----------|----------|------|------|
| APRA_PSEAE  | 21 (21) | 1721.13 | Serralysin                                                        | 7.21E+05 | 2.52E+06 |      | 3.50 |
| EFG1_PSEAE  | 30 (22) | 1584.83 | Elongation factor G 1                                             | 3.07E+05 | 8.89E+04 | 3.45 |      |
| GGT_PSEAE   | 30 (29) | 1578.55 | Glutathione hydrolase proenzyme                                   | 1.68E+05 | 2.55E+05 |      | 1.52 |
| CATA_PSEAE  | 27 (26) | 1545.15 | Catalase                                                          | 1.77E+05 | 3.40E+05 |      | 1.92 |
| CH60_PSEA7  | 26 (25) | 1433.25 | 60 kDa chaperonin                                                 | 2.69E+05 | 4.43E+05 |      | 1.65 |
| Y421_PSEA8  | 16 (15) | 1358.82 | UPF0312 protein PLES_04211                                        | 3.01E+05 | 6.05E+04 | 4.98 |      |
| ASPQ_PSEAE  | 23 (22) | 1314.67 | Glutaminase-asparaginase                                          | 2.75E+05 | 1.71E+05 | 1.61 |      |
| FUMC2_PSEAE | 20 (17) | 1281.58 | Fumarate hydratase class II 2                                     | 3.00E+05 | 1.10E+05 | 2.73 |      |
| DAVT_PSEAE  | 16 (16) | 1266.37 | 5-aminovalerate aminotransferase DavT                             | 2.29E+05 | 2.07E+05 | 1.11 |      |
| ATOB_PSEAE  | 17 (16) | 1261.18 | Acetyl-CoA acetyltransferase                                      | 2.44E+05 | 1.46E+05 | 1.67 |      |
| Y3922_PSEAE | 19 (19) | 1244.88 | Uncharacterized protein PA3922                                    | 2.23E+05 | 1.73E+05 | 1.29 |      |
| LYSC_PSEAB  | 11 (11) | 1228.7  | Lysyl endopeptidase                                               | 7.29E+05 | 4.97E+05 | 1.47 |      |
| DHE2_PSEAE  | 24 (22) | 1220.4  | NAD-specific glutamate dehydrogenase                              | 4.82E+04 | 8.09E+04 |      | 1.68 |
| P5217_PSEAE | 17 (14) | 1192.1  | Probable binding protein component of ABC iron transporter PA5217 | 2.65E+05 | 3.16E+04 | 8.39 |      |
| DLDH1_PSEAE | 17 (17) | 1180.89 | Dihydrolipoyl dehydrogenase                                       | 1.12E+05 | 8.04E+04 | 1.39 |      |
| MASZ_PSEA7  | 22 (16) | 1150.9  | Malate synthase G                                                 | 5.47E+04 | 2.90E+04 | 1.89 |      |
| PILY1_PSEAW | 15 (14) | 1109.35 | Type IV pilus biogenesis factor PilY1                             | 4.14E+04 | 6.77E+04 |      | 1.64 |
| ATPA_PSEAB  | 19 (18) | 1106.82 | ATP synthase subunit alpha                                        | 2.42E+05 | 1.89E+05 | 1.28 |      |
| CBPD_PSEAE  | 14 (3)  | 1100.26 | Chitin-binding protein CbpD                                       | 1222.8   | 6318.03  |      | 5.17 |
| FABY_PSEAE  | 16 (16) | 1099.54 | Beta-ketoacyl-[acyl-carrier-protein] synthase FabY                | 9.96E+04 | 4.92E+04 | 2.02 |      |
| PORF_PSEAE  | 15 (15) | 1089.51 | Outer membrane porin F                                            | 2.10E+05 | 8.96E+04 | 2.34 |      |
| AMPA_PSEAB  | 15 (8)  | 1061.24 | Probable cytosol aminopeptidase                                   | 3.38E+04 | 5.04E+04 |      | 1.49 |
| PNP_PSEAB   | 16 (16) | 1022.98 | Polyribonucleotide nucleotidyltransferase                         | 1.39E+05 | 9.93E+04 | 1.40 |      |
| MASZ_PSEAB  | 18 (13) | 994.58  | Malate synthase G                                                 | 5.21E+04 | 2.06E+04 | 2.53 |      |
| NOSZ_PSEAE  | 21 (17) | 976.55  | Nitrous-oxide reductase                                           | 5.89E+04 | 1.28E+05 |      | 2.17 |
| SAHH_PSEAB  | 16 (14) | 904.5   | Adenosylhomocysteinase                                            | 9.99E+04 | 1.62E+05 |      | 1.62 |
| CBPD_PSEAB  | 12 (9)  | 898.73  | Chitin-binding protein CbpD                                       | 7.71E+04 | 1.41E+05 |      | 1.83 |
| OTCC_PSEAE  | 19 (19) | 892.45  | Ornithine carbamoyltransferase, catabolic                         | 2.35E+05 | 1.30E+05 | 1.81 |      |
| PGK_PSEA8   | 14 (14) | 858.35  | Phosphoglycerate kinase                                           | 1.95E+05 | 9.81E+04 | 1.99 |      |



|             |         |        |                                                                                           |          |          |      |       |
|-------------|---------|--------|-------------------------------------------------------------------------------------------|----------|----------|------|-------|
| FLID1_PSEAI | 14 (13) | 850.79 | A-type flagellar hook-associated protein 2                                                | 4.52E+04 | 2.49E+04 | 1.82 |       |
| DSBA_PSEAB  | 14 (13) | 812.31 | Thiol:disulfide interchange protein DsbA                                                  | 2.29E+05 | 4.06E+04 | 5.64 |       |
| SPUD_PSEAB  | 17 (16) | 807.21 | Putrescine-binding periplasmic protein SpuD                                               | 4.03E+05 | 1.07E+05 | 3.77 |       |
| DAPA_PSEAE  | 11 (11) | 776.34 | 4-hydroxy-tetrahydrodipicolinate synthase                                                 | 8.46E+04 | 4.10E+04 | 2.06 |       |
| HUTU_PSEAB  | 16 (15) | 761.29 | Urocanate hydratase                                                                       | 5.67E+04 | 5.69E+04 |      | 1.00  |
| GSHR_PSEAE  | 10 (9)  | 742.12 | Glutathione reductase                                                                     | 5.46E+04 | 6.58E+04 |      | 1.21  |
| DAVD_PSEAE  | 13 (10) | 739.95 | Glutarate-semialdehyde dehydrogenase DavD                                                 | 6.78E+04 | 5.64E+04 | 1.20 |       |
| CISY_PSEAE  | 17 (17) | 733.52 | Citrate synthase                                                                          | 9.88E+04 | 9.84E+04 | 1.00 |       |
| IDH_PSEAB   | 11 (11) | 725.1  | Isocitrate dehydrogenase [NADP]                                                           | 6461.41  | 7.71E+04 |      | 11.93 |
| SYI_PSEAE   | 13 (3)  | 709.6  | Isoleucine--tRNA ligase                                                                   | 3140.55  | 2067.53  | 1.52 |       |
| RPOC_PSEAB  | 16 (14) | 709.47 | DNA-directed RNA polymerase subunit beta'                                                 | 5332.75  | 1.87E+04 |      | 3.51  |
| SYI_PSEAB   | 20 (9)  | 669.64 | Isoleucine--tRNA ligase                                                                   | 6.48E+04 | 4.09E+04 | 1.58 |       |
| ARUC_PSEAE  | 12 (10) | 660.95 | Succinylornithine transaminase/acetylornithine aminotransferase                           | 1.10E+05 | 2.94E+04 | 3.74 |       |
| TOLB_PSEAE  | 10 (9)  | 643.23 | Protein TolB                                                                              | 2.13E+04 | 3.08E+04 |      | 1.45  |
| EFG2_PSEAE  | 10 (4)  | 624.24 | Elongation factor G 2                                                                     | 1.70E+04 | 1.67E+04 | 1.02 |       |
| THIO_PSEAE  | 9 (8)   | 622    | Thioredoxin                                                                               | 6.31E+04 | 8907.59  | 7.08 |       |
| SYI_PSEAB   | 11 (3)  | 619.52 | Isoleucine--tRNA ligase                                                                   | 3.49E+04 | 1.66E+04 | 2.10 |       |
| ODP2_PSEAE  | 10 (10) | 617.39 | Dihydrolipoyllysine-residue acetyltransferase component of pyruvate dehydrogenase complex | 1.83E+04 | 2.83E+04 |      | 1.55  |
| GPMI_PSEAE  | 11 (8)  | 608.47 | 2,3-bisphosphoglycerate-independent phosphoglycerate mutase                               | 7.32E+04 | 2.84E+04 | 2.58 |       |
| AAT_PSEAE   | 10 (9)  | 596.02 | Aspartate aminotransferase                                                                | 5564.44  | 2.82E+04 |      | 5.07  |
| Y1579_PSEAE | 13 (12) | 593.12 | Uncharacterized protein PA1579                                                            | 6.36E+04 | 7269.84  | 8.75 |       |
| PCKA_PSEAE  | 14 (11) | 574.99 | Phosphoenolpyruvate carboxykinase (ATP)                                                   | 3.30E+04 | 1.95E+04 | 1.69 |       |
| GPMI_PSEAB  | 8 (2)   | 540.63 | 2,3-bisphosphoglycerate-independent phosphoglycerate mutase                               | 7290.43  | 8764.32  |      | 1.20  |
| PROA_PSEAB  | 10 (1)  | 536.13 | Gamma-glutamyl phosphate reductase                                                        | 6987.28  | 4299.79  | 1.63 |       |
| GCSP1_PSEAE | 15 (11) | 533.16 | Glycine dehydrogenase (decarboxylating) 1                                                 | 3.76E+05 | 1.20E+05 | 3.13 |       |
| ILVC_PSEAB  | 10 (9)  | 526.34 | Ketol-acid reductoisomerase (NADP(+))                                                     | 4.03E+04 | 2.30E+04 | 1.75 |       |

|             |         |        |                                                            |          |          |       |      |
|-------------|---------|--------|------------------------------------------------------------|----------|----------|-------|------|
| CYSNC_PSEAE | 9 (9)   | 523.06 | Bifunctional enzyme CysN/CysC                              | 3.26E+04 | 1.49E+04 | 2.19  |      |
| FLICB_PSEAE | 7 (2)   | 513.41 | B-type flagellin                                           | 3.90E+04 | 7480.17  | 5.21  |      |
| METK_PSEAB  | 10 (9)  | 495.62 | S-adenosylmethionine synthase                              | 6.79E+04 | 1.71E+04 | 3.97  |      |
| SYV_PSEAE   | 13 (11) | 495.56 | Valine--tRNA ligase                                        | 2.63E+04 | 1.42E+04 | 1.85  |      |
| PURE_PSEAE  | 5 (5)   | 495.13 | N5-carboxyaminoimidazole ribonucleotide mutase             | 3.12E+04 | 3624.23  | 8.61  |      |
| PROA_PSEA7  | 10 (2)  | 488.5  | Gamma-glutamyl phosphate reductase                         | 3208.65  | 4325.88  |       | 1.35 |
| SYR_PSEAB   | 11 (11) | 463.78 | Arginine--tRNA ligase                                      | 9412.27  | 8.65E+04 |       | 9.19 |
| PORD_PSEAE  | 8 (8)   | 457.18 | Porin D                                                    | 6.67E+04 | 4.41E+04 | 1.51  |      |
| FABB_PSEAB  | 7 (6)   | 452.02 | 3-oxoacyl-[acyl-carrier-protein] synthase 1                | 6.89E+04 | 2.73E+04 | 2.52  |      |
| SPUE_PSEAE  | 10 (8)  | 446.16 | Spermidine-binding periplasmic protein SpuE                | 4.93E+04 | 2.55E+04 | -1.93 |      |
| HEM2_PSEAE  | 5 (5)   | 427.89 | Delta-aminolevulinic acid dehydratase                      | 1.97E+04 | 2.24E+04 |       | 1.14 |
| PQSB_PSEAE  | 7 (7)   | 427.79 | 2-heptyl-4(1H)-quinolone synthase subunit PqsB             | 3.23E+04 | 3439.98  | 9.39  |      |
| IPYR_PSEAE  | 8 (8)   | 420.41 | Inorganic pyrophosphatase                                  | 2.94E+04 | 3062.3   | 9.60  |      |
| AHPC_PSEAB  | 7 (6)   | 410.3  | Alkyl hydroperoxide reductase C                            | 1.02E+05 | 2.69E+04 | 3.79  |      |
| DNAK_PSEAB  | 8 (8)   | 408.35 | Chaperone protein DnaK                                     | 4213.8   | 1.74E+04 |       | 4.13 |
| GATA_PSEAE  | 6 (2)   | 404.01 | Glutamyl-tRNA(Gln) amidotransferase subunit A              | 5954.4   | 4121.81  | 1.44  |      |
| DCTP_PSEAE  | 7 (6)   | 399.98 | C4-dicarboxylate-binding periplasmic protein DctP          | 3.85E+04 | 1.17E+04 | 3.29  |      |
| NIRF_PSEAE  | 5 (5)   | 399.93 | Protein NirF                                               | 3061.88  | 1.69E+04 |       | 5.52 |
| PYRC_PSEAE  | 6 (6)   | 397.51 | Dihydroorotase                                             | 1.76E+04 | 6411.51  | 2.75  |      |
| LIP_PSEAE   | 6 (5)   | 396.13 | Triacylglycerol lipase                                     | 1.46E+04 | 2.07E+04 |       | 1.42 |
| SODM_PSEAE  | 8 (7)   | 395.32 | Superoxide dismutase [Mn]                                  | 1.32E+05 | 1.49E+04 | 8.86  |      |
| DHAS_PSEAE  | 7 (7)   | 387.06 | Aspartate-semialdehyde dehydrogenase                       | 3.45E+04 | 2.61E+04 | 1.32  |      |
| ACNB_PSEAE  | 7 (7)   | 386.3  | Aconitate hydratase B                                      | 8600.11  | 4.86E+04 |       | 5.65 |
| SODF_PSEAE  | 4 (4)   | 383.5  | Superoxide dismutase [Fe]                                  | 4.51E+05 | 2.93E+05 | 1.54  |      |
| FADB_PSEAB  | 8 (8)   | 381.96 | Fatty acid oxidation complex subunit alpha                 | 1177.03  | 9861.66  |       | 8.38 |
| GATB_PSEAB  | 7 (4)   | 364.53 | Aspartyl/glutamyl-tRNA(Asn/Gln) amidotransferase subunit B | 1.52E+04 | 2208.17  | 6.88  |      |
| LASA_PSEAB  | 7 (7)   | 354.17 | Protease LasAe                                             | 1.24E+05 | 9.37E+04 | 1.32  |      |
| ETFA_PSEAE  | 6 (6)   | 353.4  | Electron transfer flavoprotein subunit alpha               | 2.80E+04 | 3628.91  | 7.72  |      |
| ACKA_PSEAB  | 8 (3)   | 353.31 | Acetate kinase                                             | 2061.32  | 4400.38  |       | 2.13 |

|             |       |        |                                                       |          |          |      |      |
|-------------|-------|--------|-------------------------------------------------------|----------|----------|------|------|
| NLPD_PSEAE  | 5 (5) | 352.7  | Lipoprotein NlpD/LppB homolog                         | 3899.47  | 9122.23  |      | 2.34 |
| HEM6_PSEA8  | 7 (7) | 347.43 | Oxygen-dependent coproporphyrinogen-III oxidase       | 1.97E+04 | 2.78E+04 |      | 1.41 |
| ETFB_PSEAE  | 7 (6) | 347.05 | Electron transfer flavoprotein subunit beta           | 2.73E+04 | 5334.8   | 5.12 |      |
| SPUC_PSEAE  | 6 (6) | 335.12 | Putrescine--pyruvate aminotransferase                 | 9135.18  | 7493.05  | 1.22 |      |
| ACKA_PSEA7  | 7 (2) | 332.9  | Acetate kinase                                        | 1.23E+04 | 3.42E+04 |      | 2.78 |
| DPO3B_PSEAE | 5 (5) | 319.48 | Beta sliding clamp                                    | 1.95E+04 | 8751.74  | 2.23 |      |
| MMSA_PSEAE  | 5 (5) | 308.96 | Methylmalonate-semialdehyde dehydrogenase [acylating] | 1.40E+04 | 2.86E+04 |      | 2.04 |
| EDD_PSEAE   | 6 (6) | 290.45 | Phosphogluconate dehydratase                          | 2.11E+04 | 2.74E+04 |      | 1.30 |
| AGUA_PSEAE  | 4 (2) | 280.84 | Agmatine deiminase                                    | 3324.84  | 4340.32  |      | 1.31 |
| GLN1B_PSEAE | 7 (7) | 264.25 | Glutamine synthetase                                  | 2.27E+04 | 2.58E+04 |      | 1.14 |
| PILY1_PSEAE | 7 (7) | 257.75 | Type IV pilus biogenesis factor PilY1                 | 2.79E+04 | 3.20E+04 |      | 1.15 |
| PH4H_PSEAE  | 4 (4) | 257.36 | Phenylalanine-4-hydroxylase                           | 2.15E+04 | 2.32E+04 |      | 1.08 |
| GATA_PSEAB  | 4 (1) | 255.27 | Glutamyl-tRNA(Gln) amidotransferase subunit A         | 1197.02  | 950.76   | 1.26 |      |
| ARGC_PSEAB  | 4 (3) | 253.56 | N-acetyl-gamma-glutamyl-phosphate reductase           | 6176.89  | 5874.67  | 1.05 |      |
| ILVE_PSEAE  | 4 (4) | 243.49 | Branched-chain-amino-acid aminotransferase            | 3.52E+04 | 1.76E+04 | 2.00 |      |
| FPTA_PSEAE  | 4 (4) | 242.95 | Fe(3+)-pyochelin receptor                             | 8866.12  | 1.10E+04 |      | 1.24 |
| FUMC1_PSEAE | 5 (5) | 239.27 | Fumarate hydratase class II 1                         | 1.74E+04 | 1.54E+04 | 1.13 |      |
| LOLA_PSEAB  | 4 (3) | 238.48 | Outer-membrane lipoprotein carrier protein            | 8102.86  | 2745.99  | 2.95 |      |
| FADA_PSEAB  | 4 (4) | 237.78 | 3-ketoacyl-CoA thiolase                               | 842      | 6639.63  |      | 7.89 |
| SYE_PSEA7   | 4 (4) | 234.54 | Glutamate--tRNA ligase                                | 7665.45  | 1679.85  | 4.56 |      |
| TOP1_PSEAE  | 7 (5) | 234.21 | DNA topoisomerase 1                                   | 4.33E+04 | 1.72E+04 | 2.52 |      |
| CHMU_PSEAE  | 4 (4) | 232.63 | Monofunctional chorismate mutase                      | 8706.94  | 7995.06  | 1.09 |      |
| SSB_PSEAE   | 4 (3) | 232.17 | Single-stranded DNA-binding protein                   | 1.27E+04 | 2250.29  | 5.64 |      |
| AK_PSEAE    | 8 (8) | 232.15 | Aspartokinase                                         | 1.96E+04 | 5192.46  | 3.77 |      |
| LEU3_PSEAE  | 3 (3) | 227.62 | 3-isopropylmalate dehydrogenase                       | 2714.73  | 7035.58  |      | 2.59 |
| PAGL_PSEAE  | 3 (3) | 226.88 | Lipid A deacylase PagL                                | 6511.24  | 3596.35  | 1.81 |      |
| GSHB_PSEAE  | 4 (4) | 225.42 | Glutathione synthetase                                | 7657.24  | 6003.19  | 1.28 |      |
| SYL_PSEAB   | 5 (5) | 223.06 | Leucine--tRNA ligase                                  | 1.70E+04 | 2576.54  | 6.60 |      |
| GYRA_PSEAE  | 5 (4) | 222.85 | DNA gyrase subunit A                                  | 7084.7   | 5449.5   | 1.30 |      |

|             |       |        |                                                                    |          |          |       |      |
|-------------|-------|--------|--------------------------------------------------------------------|----------|----------|-------|------|
| DEF_PSEAE   | 3 (3) | 210.39 | Peptide deformylase                                                | 1.09E+05 | 1.16E+05 |       | 1.06 |
| FABI_PSEAE  | 3 (2) | 208.14 | Enoyl-[acyl-carrier-protein] reductase [NADH] FabI                 | 1626.69  | 311.25   | 5.23  |      |
| PAL_PSEAE   | 4 (4) | 205.71 | Peptidoglycan-associated lipoprotein                               | 1.08E+04 | 3211.83  | 3.36  |      |
| GLMU_PSEAE  | 5 (4) | 198.94 | Bifunctional protein GlmU                                          | 1.46E+04 | 1103.31  | 13.23 |      |
| SUHB_PSEAE  | 4 (4) | 197.98 | Inositol-1-monophosphatase                                         | 1.05E+04 | 3061.8   | 3.43  |      |
| ALKD_PSEAE  | 3 (3) | 195.98 | 2-dehydro-3-deoxy-phosphogluconate aldolase                        | 5541.55  | 1775.8   | 3.12  |      |
| ARGC_PSEAE  | 3 (3) | 194.73 | N-acetyl-gamma-glutamyl-phosphate reductase                        | 2313.97  | 2770.43  |       | 1.20 |
| HEM3_PSEA8  | 4 (4) | 192.9  | Porphobilinogen deaminase                                          | 1364.2   | 1874.19  |       | 1.37 |
| RNPB_PSEAB  | 2 (2) | 191.57 | Ribonuclease PH                                                    | 6358.46  | 693.89   | 9.16  |      |
| BAUA_PSEAE  | 5 (4) | 190.16 | Beta-alanine--pyruvate aminotransferase                            | 8043.6   | 1.52E+04 |       | 1.89 |
| BFR_PSEAE   | 4 (3) | 186.41 | Bacterioferritin                                                   | 6536.28  | 6499.07  | 1.01  |      |
| AZUR_PSEAE  | 4 (3) | 185.92 | Azurin                                                             | 2.96E+05 | 7.51E+04 | 3.94  |      |
| PCKA_PSEA7  | 7 (6) | 181.54 | Phosphoenolpyruvate carboxykinase (ATP)                            | 8356.54  | 9572.2   |       | 1.15 |
| ISCS_PSEAB  | 4 (3) | 173.5  | Cysteine desulfurase IscS                                          | 1.08E+04 | 7.56E+04 |       | 7.00 |
| STHA_PSEAB  | 3 (3) | 171.53 | Soluble pyridine nucleotide transhydrogenase                       | 3260.97  | 4715.82  |       | 1.45 |
| AHPF_PSEAE  | 6 (5) | 170.53 | Alkyl hydroperoxide reductase subunit F                            | 9307.1   | 856.16   | 10.87 |      |
| RRAAH_PSEA7 | 4 (3) | 160.88 | Putative 4-hydroxy-4-methyl-2-oxoglutarate aldolase                | 6.53E+04 | 7.18E+04 |       | 1.10 |
| CATE_PSEAE  | 3 (2) | 159.59 | Catalase HPII                                                      | 947.59   | 2818.09  |       | 2.97 |
| NAPA_PSEAB  | 5 (5) | 158.75 | Periplasmic nitrate reductase                                      | 3810.71  | 4172.73  |       | 1.10 |
| LDC_PSEAE   | 2 (2) | 155.3  | Murein tetrapeptide carboxypeptidase                               | 4678.6   | 1529.34  | 3.06  |      |
| PPIA_PSEAE  | 3 (3) | 154.38 | Peptidyl-prolyl cis-trans isomerase A                              | 7697.21  | 1939.43  | 3.97  |      |
| PDXJ_PSEAB  | 3 (3) | 152.79 | Pyridoxine 5'-phosphate synthase                                   | 1.56E+04 | 3644.7   | 4.28  |      |
| ESTA_PSEAE  | 2 (2) | 148.08 | Esterase EstA                                                      | 3507.64  | 2461.11  | 1.43  |      |
| FABZ_PSEAB  | 4 (4) | 146.05 | 3-hydroxyacyl-[acyl-carrier-protein] dehydratase FabZ              | 1.05E+04 | 1100.25  | 9.54  |      |
| PURK_PSEAE  | 3 (3) | 142.88 | N5-carboxyaminoimidazole ribonucleotide synthase                   | 1.36E+04 | 1.28E+04 | 1.06  |      |
| FUR_PSEAE   | 2 (2) | 141.92 | Ferric uptake regulation protein                                   | 5959.49  | 384.45   | 15.50 |      |
| PHS_PSEAB   | 3 (3) | 139.29 | Putative pterin-4-alpha-carbinolamine dehydratase                  | 5554.42  | 1113.98  | 4.99  |      |
| DAPD_PSEAE  | 2 (1) | 137.02 | 2,3,4,5-tetrahydropyridine-2,6-dicarboxylate N-succinyltransferase | 4050.49  | 2521.48  | 1.61  |      |

|             |       |        |                                                            |          |          |       |       |
|-------------|-------|--------|------------------------------------------------------------|----------|----------|-------|-------|
| LGUL_PSEAE  | 4 (3) | 135.46 | Lactoylglutathione lyase                                   | 2625.19  | 377.86   | 6.95  |       |
| LEU1_PSEA7  | 3 (3) | 130.19 | 2-isopropylmalate synthase                                 | 2734.51  | 9217.13  |       | 3.37  |
| BCCP_PSEAE  | 2 (2) | 128.68 | Biotin carboxyl carrier protein of acetyl-CoA carboxylase  | 1.48E+04 | 1382.25  | 10.71 |       |
| PYRB_PSEAB  | 2 (2) | 127.56 | Aspartate carbamoyltransferase                             | 1776.2   | 1790.56  |       | 1.01  |
| BAMB_PSEAE  | 3 (2) | 126.01 | Outer membrane protein assembly factor BamB                | 372.5    | 1907.89  |       | 5.12  |
| GMHA_PSEAB  | 3 (3) | 124.92 | Phosphoheptose isomerase                                   | 9712.96  | 1077.8   | 9.01  |       |
| SYT_PSEA7   | 4 (4) | 124.46 | Threonine--tRNA ligase                                     | 4836.97  | 1860.35  | 2.60  |       |
| GATB_PSEA7  | 4 (2) | 123.06 | Aspartyl/glutamyl-tRNA(Asn/Gln) amidotransferase subunit B | 5170.5   | 838.27   | 6.17  |       |
| HFQ_PSEAB   | 3 (3) | 122.28 | RNA-binding protein Hfq                                    | 6416.85  | 3111.37  | 2.06  |       |
| ILVD_PSEAB  | 3 (3) | 119.3  | Dihydroxy-acid dehydratase                                 | 804.5    | 722.81   | 1.11  |       |
| NQRF_PSEAE  | 2 (2) | 116.24 | Na(+)-translocating NADH-quinone reductase subunit F       | 3248     | 714.97   | 4.54  |       |
| GCH12_PSEAE | 4 (4) | 115.66 | GTP cyclohydrolase 1 2                                     | 4425.36  | 1249.16  | 3.54  |       |
| RLPA_PSEAB  | 3 (3) | 115.15 | Endolytic peptidoglycan transglycosylase RlpA              | 1446.96  | 2795.51  |       | 1.93  |
| SECB_PSEAB  | 2 (2) | 115.06 | Protein-export protein SecB                                | 3199.21  | 418.59   | 7.64  |       |
| Y3753_PSEAE | 2 (2) | 114.84 | Uncharacterized protein PA3753                             | 7499.59  | 3650.27  | 2.05  |       |
| TAL_PSEA7   | 3 (1) | 114.66 | Transaldolase                                              | 1647.57  | 3519.79  |       | 2.14  |
| MURD_PSEAE  | 2 (2) | 112.38 | UDP-N-acetylmuramoylalanine--D-glutamate ligase            | 4434.5   | 2332.82  | 1.90  |       |
| PYRX_PSEAE  | 5 (4) | 110.76 | Dihydroorotase-like protein                                | 7024.61  | 6361.23  | 1.10  |       |
| RISB_PSEAB  | 3 (2) | 110.74 | 6,7-dimethyl-8-ribityllumazine synthase                    | 3579.49  | 2701.37  | 1.33  |       |
| FMNRE_PSEAE | 3 (3) | 110.19 | NAD(P)H-dependent FMN reductase PA1204                     | 8469.06  | 3805.84  | 2.23  |       |
| NDK_PSEAB   | 5 (5) | 108.38 | Nucleoside diphosphate kinase                              | 1.02E+04 | 1885.3   | 5.41  |       |
| CLPB_PSEAE  | 3 (3) | 107.07 | Chaperone protein ClpB                                     | 4561.05  | 1524.99  | 2.99  |       |
| TAL_PSEAB   | 2 (1) | 106.51 | Transaldolase O                                            | 227.24   | 227.36   |       | 1.00  |
| TOLQ_PSEAE  | 1 (1) | 101.97 | Protein TolQ                                               | 297.22   | 390.52   |       | 1.31  |
| MTIP_PSEAE  | 2 (2) | 100.73 | S-methyl-5'-thioinosine phosphorylase                      | 1778.69  | 1051.62  | 1.69  |       |
| AROE_PSEAE  | 2 (2) | 98.97  | Shikimate dehydrogenase (NADP(+))                          | 796.08   | 2001.48  |       | 2.51  |
| NUOCD_PSEAB | 3 (2) | 97.78  | NADH-quinone oxidoreductase subunit C/D                    | 1.83E+04 | 1.98E+04 |       | 1.08  |
| METZ_PSEAE  | 2 (1) | 97.36  | O-succinylhomoserine sulfhydrylase                         | 90.49    | 794.09   |       | 8.78  |
| COBN_PSEAE  | 3 (3) | 96.92  | Aerobic cobaltochelataase subunit CobN                     | 317.72   | 6266.77  |       | 19.72 |
| PSTS_PSEAB  | 3 (2) | 94.55  | Phosphate-binding protein PstS                             | 5695.89  | 802.38   | 7.10  |       |

|             |       |       |                                                   |          |          |        |       |
|-------------|-------|-------|---------------------------------------------------|----------|----------|--------|-------|
| ARCA_PSEAE  | 2 (2) | 94.3  | Arginine deiminase                                | 494.85   | 2781.39  |        | 5.62  |
| GCH1L_PSEAE | 2 (2) | 94.23 | GTP cyclohydrolase 1 type 2 homolog               | 1555.48  | 329.59   | 4.72   |       |
| HISX_PSEAE  | 3 (2) | 93.61 | Histidinol dehydrogenase                          | 788.82   | 2889.26  |        | 3.66  |
| HTPX_PSEAB  | 1 (1) | 93.37 | Protease HtpX                                     | 89.02    | 181.45   |        | 2.04  |
| BEKAS_PSEAE | 3 (2) | 91.38 | Beta-ketodecanoyl-[acyl-carrier-protein] synthase | 1217.02  | 4891.8   |        | 4.02  |
| QOR_PSEAE   | 2 (2) | 87.85 | Quinone oxidoreductase O                          | 578.68   | 507.47   | 1.14   |       |
| CYSM_PSEAE  | 3 (2) | 86.17 | Cysteine synthase B                               | 1.28E+04 | 7889.75  | 1.62   |       |
| NORB_PSEAE  | 3 (1) | 84.66 | Nitric oxide reductase subunit B                  | 172.97   | 2598.4   |        | 15.02 |
| RPIA_PSEAB  | 2 (2) | 84.01 | Ribose-5-phosphate isomerase A                    | 157.67   | 85.06    | 1.85   |       |
| AMIE_PSEA8  | 2 (2) | 83.17 | Aliphatic amidase                                 | 857.02   | 1871.26  |        | 2.18  |
| ASTB_PSEAB  | 3 (3) | 81.61 | N-succinylarginine dihydrolase                    | 1.03E+04 | 5476.26  | 1.88   |       |
| GLO2_PSEA7  | 2 (1) | 79.54 | Hydroxyacylglutathione hydrolase                  | 571.74   | 284.15   | 2.01   |       |
| ACP1_PSEAE  | 2 (2) | 76.32 | Acyl carrier protein 1                            | 7527.94  | 1435.74  | 5.24   |       |
| HISZ_PSEAB  | 1 (1) | 75.84 | ATP phosphoribosyltransferase regulatory subunit  | 1069.59  | 710.69   | 1.51   |       |
| FMK1_PSEAI  | 1 (1) | 75.54 | Fimbrial protein                                  | 3524.2   | 1141.47  | 3.09   |       |
| TYSY_PSEAB  | 2 (2) | 74.88 | Thymidylate synthase                              | 7102.59  | 7641.33  |        | 1.08  |
| Y2116_PSEAE | 2 (2) | 74.72 | Putative hydro-lyase PA2116                       | 4248.96  | 4127.6   | 1.03   |       |
| OPRM_PSEAE  | 1 (1) | 70.94 | Outer membrane protein OprM                       | 296.31   | 1737.28  |        | 5.86  |
| PQSC_PSEAE  | 3 (3) | 69.54 | 2-heptyl-4(1H)-quinolone synthase subunit PqsC    | 3988.88  | 1.81E+04 |        | 4.54  |
| Y2770_PSEAE | 2 (1) | 68.95 | Uncharacterized isomerase PA2770                  | 1453.01  | 447.82   | 3.24   |       |
| PDXA_PSEAE  | 1 (1) | 68.71 | 4-hydroxythreonine-4-phosphate dehydrogenase      | 586.3    | 696.92   |        | 1.19  |
| RPOB_PSEAB  | 4 (3) | 66.99 | DNA-directed RNA polymerase subunit beta          | 417.42   | 6529.77  |        | 15.64 |
| CYNS_PSEAB  | 2 (2) | 66.47 | Cyanate hydratase                                 | 7814.67  | 7726.41  | 1.01   |       |
| MTNC_PSEAB  | 1 (1) | 65.56 | Enolase-phosphatase E1                            | 361.13   | 0.61     | 592.02 |       |
| PDXY_PSEAB  | 1 (1) | 64.89 | Pyridoxal kinase PdxY                             | 520.75   | 274.28   | 1.90   |       |
| HIS7_PSEA7  | 1 (1) | 63.69 | Imidazoleglycerol-phosphate dehydratase           | 792.19   | 496.45   | 1.60   |       |
| GCSH1_PSEAE | 2 (2) | 63.28 | Glycine cleavage system H protein 1               | 7136.94  | 1373.74  | 5.20   |       |
| G6PI_PSEA7  | 2 (2) | 56.35 | Glucose-6-phosphate isomerase                     | 1652.8   | 1305.12  | 1.27   |       |
| Y049_PSEAE  | 1 (1) | 55.94 | Uncharacterized protein PA0049                    | 18.08    | 172.96   |        | 9.57  |

|             |       |       |                                                             |          |          |       |      |
|-------------|-------|-------|-------------------------------------------------------------|----------|----------|-------|------|
| RMLC_PSEAE  | 1 (1) | 54.26 | dTDP-4-dehydrorhamnose 3,5-epimerase                        | 779.69   | 329.53   | 2.37  |      |
| CPDA_PSEAI  | 1 (1) | 54.04 | 3',5'-cyclic adenosine monophosphate phosphodiesterase CpdA | 358.29   | 156.76   | 2.29  |      |
| ASTE_PSEAB  | 1 (1) | 52.48 | Succinylglutamate desuccinylase                             | 581.57   | 346.64   | 1.68  |      |
| PIUC_PSEAE  | 1 (1) | 51.47 | PKHD-type hydroxylase PiuC                                  | 1697.81  | 88.07    | 19.28 |      |
| GCSH2_PSEAE | 1 (1) | 49.67 | Glycine cleavage system H protein 2                         | 1582.76  | 200.03   | 7.91  |      |
| AROB_PSEA7  | 2 (1) | 48.44 | 3-dehydroquinate synthase                                   | 1982.18  | 1886.25  | 1.05  |      |
| TOXA_PSEAE  | 1 (1) | 47.72 | Exotoxin A                                                  | 375.19   | 1283.95  |       | 3.42 |
| OTCA_PSEAE  | 3 (3) | 45.64 | Ornithine carbamoyltransferase, anabolic                    | 6.72E+04 | 3.37E+04 | 1.99  |      |
| LPTD_PSEA8  | 1 (1) | 45.08 | LPS-assembly protein LptD                                   | 481.84   | 1030.82  |       | 2.14 |
| DAPB_PSEAB  | 1 (1) | 43.16 | 4-hydroxy-tetrahydrodipicolinate reductase                  | 2019.79  | 636.26   | 3.17  |      |
| APEB_PSEAB  | 2 (2) | 37.64 | Probable M18 family aminopeptidase 2                        | 569.57   | 1212.15  |       | 2.13 |
| HUTH_PSEAB  | 1 (1) | 35.44 | Histidine ammonia-lyase                                     | 599.18   | 981.35   |       | 1.64 |
| NUOF_PSEAE  | 2 (2) | 35.33 | NADH-quinone oxidoreductase subunit F                       | 2934.76  | 5397.42  |       | 1.84 |
| KYNB_PSEAB  | 1 (1) | 34.07 | Kynurenine formamidase                                      | 2045.23  | 39.14    | 52.25 |      |
| THRH_PSEAE  | 2 (2) | 32.42 | Phosphoserine phosphatase ThrH                              | 2.64E+04 | 5648.48  | 4.67  |      |
